# Supplementary material for: Oxidation of organic diselenides and ditellurides by H2O2for bioinspired catalyst design
Source: Royal Society of Chemistry journal article supplement (doi:10.1039/c8cp02748j), 2018-01-01
Supplement: c8cp02748j1.pdf [file c8cp02748j1.pdf]

## - SUPPLEMENTARY INFORMATION -

# Oxidation of organic diselenides and ditellurides by H<sub>2</sub>O<sub>2</sub> for bioinspired catalyst design

Marco Bortoli <sup>a</sup>, Francesco Zaccaria <sup>b</sup>, Marco Dalla Tiezza <sup>a</sup>, Matteo Bruschi <sup>a</sup>,  
Célia Fonseca Guerra <sup>b, c</sup>, F. Matthias Bickelhaupt <sup>b, d</sup> and Laura Orian <sup>a</sup>.

<sup>a</sup> Dipartimento di Scienze Chimiche Università degli Studi di Padova, Via Marzolo 1, 35131 Padova, Italy

<sup>b</sup> Department of Theoretical Chemistry and Amsterdam Center for Multiscale Modeling (ACMM), Vrije  
Universiteit Amsterdam, De Boelelaan 1083, 1081 HV Amsterdam, The Netherlands

<sup>c</sup> Leiden Institute of Chemistry, Leiden University, PO Box 9502, 2300 RA Leiden, The Netherlands

<sup>d</sup> Institute for Molecules and Materials (IMM), Radboud University, Heyendaalseweg 135, 6525 AJ Nijmegen,  
The Netherlands

## Table of Contents

|                                                                                                                                                                                                                                                                                                 |    |
|-------------------------------------------------------------------------------------------------------------------------------------------------------------------------------------------------------------------------------------------------------------------------------------------------|----|
| <b>Scheme S1</b> Organic hydroperoxides reduction mechanism catalyzed by GPx; .....                                                                                                                                                                                                             | 3  |
| <b>Table S1</b> Energies (in kcal mol <sup>-1</sup> ) and $\psi$ dihedral amplitude ( $^{\circ}$ ) of stationary points and transition states for the oxidation of <b>(PhSe)<sub>2</sub></b> and <b>(PhTe)<sub>2</sub></b> in two proposed mechanisms one. Level of theory ZORA-OLYP/TZ2P. .... | 3  |
| <b>Table S2</b> Energy decomposition analysis (in gas phase, in kcal mol <sup>-1</sup> ) for the first oxidation of model diphenyldisulphides, diphenyldiselenides and diphenylditellurides; level of theory ZORA-OLYP/TZ2P .....                                                               | 3  |
| <b>Table S3</b> Geometries of the stationary points and transition states for the oxidation of RXXR (X=S,Se,Te; R=H, CH <sub>3</sub> ,Ph): level of theory ZORA-OLYP/TZ2P .....                                                                                                                 | 4  |
| <b>Table S4</b> Geometries of the stationary points and transition states for the oxidation of HXXH (X=S,Se,Te): level of theory ZORA-BLYP-D3(BJ)/TZ2P .....                                                                                                                                    | 10 |
| <b>Table S5</b> Geometries of the stationary points and transition states for the oxidation of substituted diselenides and ditellurides; level of theory ZORA-OLYP/TZ2P .....                                                                                                                   | 11 |
| <b>Table S6</b> Geometries of the stationary points and transition states for the isomerization of the selenoxides and telluroxides. Level of theory ZORA-OLYP/TZ2P .....                                                                                                                       | 25 |

**Scheme S1** Organic hydroperoxides reduction mechanism catalyzed by GPx;

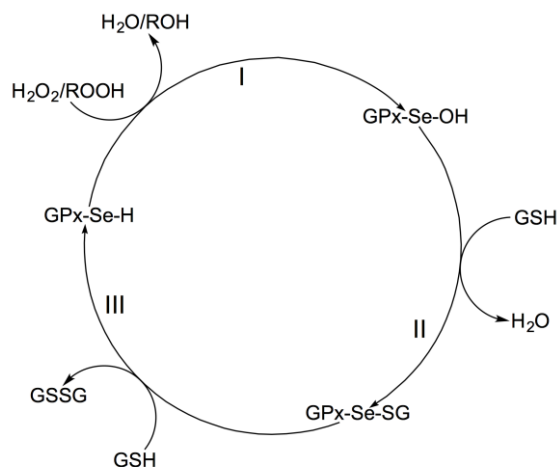

GSH is glutathione: the selenol form of the enzyme (GPx-Se-H) is oxidized to selenenic acid (GPx-Se-OH) and the hydroperoxide is reduced (oxidative step, I); GPx-Se-OH reacts with one equivalent of GSH and the selenenylsulfide intermediate (GPx-Se-SG) forms (first reductive step, II); GPx-Se-SG reacts with a second equivalent of GSH, GSSG forms and GPx-Se-H is regenerated (second reductive step, III).

**Table S1** Energies (in kcal mol<sup>-1</sup>) and  $\psi$  dihedral amplitude ( $^{\circ}$ ) of stationary points and transition states for the oxidation of **(PhSe)<sub>2</sub>** and **(PhTe)<sub>2</sub>** in two proposed mechanisms one. Level of theory ZORA-OLYP/TZ2P.

|             | <b>(PhSe)<sub>2</sub></b> |            |        |            | <b>(PhTe)<sub>2</sub></b> |            |        |            |
|-------------|---------------------------|------------|--------|------------|---------------------------|------------|--------|------------|
|             | cis                       |            | trans  |            | cis                       |            | trans  |            |
|             | $\psi$                    | $\Delta E$ | $\psi$ | $\Delta E$ | $\psi$                    | $\Delta E$ | $\psi$ | $\Delta E$ |
|             | 82                        | -2.0       | 82     | -2.0       | 83                        | -1.9       | 83     | -1.9       |
| <b>TSox</b> | 70                        | 21.0       | -169   | 19.1       | 72                        | 12.4       | -162   | 13.2       |
| <b>PCox</b> | 51                        | -41.1      | -163   | -42.3      | 41                        | -43.6      | -167   | -44.7      |

**Table S2** Energy decomposition analysis (in gas phase, in kcal mol<sup>-1</sup>) for the first oxidation of model diphenyldisulphides, diphenyldiselenides and diphenylditellurides; level of theory ZORA-OLYP/TZ2P

| R               |             | S                         |                          |                        | Se                        |                          |                        | Te                        |                          |                        |
|-----------------|-------------|---------------------------|--------------------------|------------------------|---------------------------|--------------------------|------------------------|---------------------------|--------------------------|------------------------|
|                 |             | $\Delta E_{\text{Pauli}}$ | $\Delta V_{\text{elst}}$ | $\Delta E_{\text{oi}}$ | $\Delta E_{\text{Pauli}}$ | $\Delta V_{\text{elst}}$ | $\Delta E_{\text{oi}}$ | $\Delta E_{\text{Pauli}}$ | $\Delta V_{\text{elst}}$ | $\Delta E_{\text{oi}}$ |
| H               | <b>RCox</b> | 2.4                       | -2.4                     | -1.7                   | 2.5                       | -2.3                     | -1.7                   | 2.4                       | -2.1                     | -1.9                   |
|                 | <b>TSox</b> | 186.5                     | -81.4                    | -125.2                 | 159.1                     | -73.1                    | -112.7                 | 147.6                     | -72.0                    | -105.3                 |
| CH <sub>3</sub> | <b>RCox</b> | 4.0                       | -3.9                     | -2.7                   | 4.5                       | -4.0                     | -2.9                   | 4.2                       | -3.7                     | -2.9                   |
|                 | <b>TSox</b> | 169.5                     | -75.4                    | -112.6                 | 151.2                     | -70.1                    | -106.7                 | 128.1                     | -62.7                    | -89.9                  |
| Ph              | <b>RCox</b> | 3.3                       | -3.3                     | -2.4                   | 2.9                       | -2.8                     | -2.2                   | 2.9                       | -2.6                     | -2.3                   |

|                    |             |       |       |        |       |       |        |       |       |       |
|--------------------|-------------|-------|-------|--------|-------|-------|--------|-------|-------|-------|
|                    | <b>TSox</b> | 165.1 | -72.2 | -110.0 | 146.6 | -67.0 | -103.9 | 117.8 | -57.2 | -80.8 |
|                    | <b>RCox</b> | -     | -     | -      | 3.8   | -3.8  | -2.8   | 3.3   | -3.3  | -2.6  |
| NH <sub>2</sub>    | <b>TSox</b> | -     | -     | -      | 136.0 | -61.9 | -97.9  | 110.4 | -53.2 | -77.6 |
|                    | <b>RCox</b> | -     | -     | -      | 3.5   | -3.2  | -2.5   | 4.1   | -4.1  | -2.9  |
| CH <sub>3</sub> O  | <b>TSox</b> | -     | -     | -      | 138.8 | -63.1 | -99.4  | 106.4 | -51.5 | -72.9 |
|                    | <b>RCox</b> | -     | -     | -      | 3.1   | -3.0  | -2.3   | 2.9   | -2.7  | -2.4  |
| CH <sub>3</sub> Ph | <b>TSox</b> | -     | -     | -      | 143.5 | -65.5 | -102.2 | 110.3 | -53.6 | -75.3 |
|                    | <b>RCox</b> | -     | -     | -      | 2.9   | -2.6  | -2.1   | 2.8   | -2.4  | -2.2  |
| Cl                 | <b>TSox</b> | -     | -     | -      | 149.4 | -68.2 | -105.3 | 127.5 | -62.0 | -88.1 |
|                    | <b>RCox</b> | -     | -     | -      | 2.3   | -2.0  | -1.7   | 2.5   | -2.1  | -2.0  |
| CN                 | <b>TSox</b> | -     | -     | -      | 156.7 | -71.9 | -109.0 | 139.8 | -68.2 | -96.8 |
|                    | <b>RCox</b> | -     | -     | -      | 0.5   | -1.9  | -0.5   | 2.5   | -1.9  | -1.9  |
| NO <sub>2</sub>    | <b>TSox</b> | -     | -     | -      | 158.2 | -72.6 | -109.8 | 142.2 | -69.3 | -98.5 |

**Table S3** Geometries of the stationary points and transition states for the oxidation of RXXR (X=S,Se,Te; R=H, CH<sub>3</sub>,Ph): level of theory ZORA-OLYP/TZ2P

### H<sub>2</sub>O<sub>2</sub>

E = -0.65283 Ha

|   |             |              |             |
|---|-------------|--------------|-------------|
| O | 4.983820880 | -1.237526390 | 1.275512280 |
| O | 3.761505110 | -2.017929120 | 1.458569200 |
| H | 5.511638000 | -1.572976630 | 2.018507700 |
| H | 3.822632280 | -2.610335940 | 0.691437620 |

|   |              |             |              |
|---|--------------|-------------|--------------|
| O | -1.127961000 | 3.666023000 | -0.348506000 |
| H | 0.617450000  | 4.372822000 | -0.171427000 |
| H | -1.125435000 | 2.759547000 | 0.006713000  |
| H | -2.765988000 | 0.034177000 | 0.309668000  |
| H | -0.589613000 | 0.296896000 | -1.907176000 |

### TSox

E = -1.14051 Ha  
nimag = -374.08 cm<sup>-1</sup>

### (HS)<sub>2</sub>

1

E = -0.52791 Ha

|   |              |              |              |
|---|--------------|--------------|--------------|
| S | -1.445336000 | 0.006929000  | 0.586124000  |
| S | -0.757894000 | -0.841888000 | -1.161505000 |
| H | -2.758403000 | 0.090011000  | 0.272027000  |
| H | -0.474996000 | 0.291385000  | -1.843738000 |

|   |             |              |              |
|---|-------------|--------------|--------------|
| O | 6.790000000 | -1.839200000 | 1.521900000  |
| O | 7.952400000 | -3.460700000 | 1.490800000  |
| H | 7.670900000 | -1.659700000 | 1.144800000  |
| H | 7.349100000 | -3.990200000 | 0.946100000  |
| S | 5.602000000 | -0.728100000 | 0.642400000  |
| S | 4.491100000 | 1.132200000  | 0.886400000  |
| H | 4.642700000 | -1.364800000 | 1.334300000  |
| H | 5.212400000 | 1.749100000  | -0.073600000 |

### PCox

E = -1.25787 Ha

### RCox

E = -1.18147 Ha

|   |              |              |              |
|---|--------------|--------------|--------------|
| S | -1.438652000 | 0.063887000  | 0.570996000  |
| S | -0.746222000 | -0.818948000 | -1.159572000 |
| O | 0.249084000  | 3.760093000  | -0.828503000 |

|   |             |              |             |
|---|-------------|--------------|-------------|
| O | 5.326263000 | -2.051807000 | 0.937902000 |
| O | 8.217089000 | -2.007926000 | 2.248688000 |
| H | 7.326540000 | -2.270089000 | 1.974857000 |
| H | 8.436329000 | -2.619121000 | 2.961636000 |
| S | 5.292924000 | -0.810374000 | 0.123587000 |

|   |             |              |              |
|---|-------------|--------------|--------------|
| S | 4.979389000 | 0.970908000  | 1.276656000  |
| H | 3.983252000 | -0.635797000 | -0.296567000 |
| H | 6.301569000 | 1.140591000  | 1.481657000  |

### (CH<sub>3</sub>S)<sub>2</sub>

**1**

E = -1.70070 Ha

|   |              |              |              |
|---|--------------|--------------|--------------|
| S | -1.452841000 | 0.095999000  | 0.479812000  |
| S | -0.785347000 | -0.911777000 | -1.161677000 |
| C | -3.271867000 | 0.080319000  | 0.345925000  |
| H | -3.618045000 | 0.677038000  | -0.500594000 |
| H | -3.645057000 | -0.942870000 | 0.271552000  |
| H | -3.634248000 | 0.532554000  | 1.275113000  |
| C | -0.640461000 | 0.348453000  | -2.472305000 |
| H | -0.192450000 | -0.171601000 | -3.325566000 |
| H | -1.617542000 | 0.738737000  | -2.764671000 |
| H | 0.017596000  | 1.160265000  | -2.156665000 |

### RCox

E = -2.35627 Ha

|   |              |              |              |
|---|--------------|--------------|--------------|
| S | -1.475976000 | 0.168458000  | 0.449816000  |
| S | -0.735240000 | -0.888682000 | -1.131034000 |
| O | 0.118538000  | 3.886560000  | -0.852276000 |
| O | -1.033323000 | 3.727617000  | 0.032107000  |
| H | 0.763296000  | 4.256681000  | -0.227781000 |
| H | -1.047082000 | 2.756774000  | 0.130796000  |
| C | -3.290819000 | 0.050215000  | 0.313118000  |
| H | -3.662583000 | 0.579104000  | -0.566475000 |
| H | -3.602571000 | -0.995528000 | 0.294828000  |
| H | -3.682183000 | 0.531876000  | 1.215202000  |
| C | -0.699899000 | 0.275059000  | -2.533947000 |
| H | -0.222516000 | -0.281689000 | -3.347170000 |
| H | -1.706772000 | 0.562953000  | -2.842597000 |
| H | -0.102675000 | 1.156832000  | -2.298050000 |

### TSox

E = -2.31563 Ha

nimag = -335.63 cm<sup>-1</sup>

|   |              |              |              |
|---|--------------|--------------|--------------|
| S | -1.387336000 | -0.497519000 | 0.754067000  |
| S | -1.155748000 | -1.085000000 | -1.296662000 |
| O | -0.981181000 | -1.166873000 | 2.482156000  |
| O | -0.415389000 | -1.039510000 | 4.371721000  |
| H | -0.039119000 | -1.398855000 | 2.523933000  |
| H | -1.142738000 | -1.599540000 | 4.681833000  |
| C | -0.090299000 | 0.769928000  | 0.711052000  |
| H | -0.355412000 | 1.527425000  | -0.028093000 |
| H | -0.073551000 | 1.200779000  | 1.712796000  |
| H | 0.879949000  | 0.327413000  | 0.472650000  |
| C | -2.673955000 | -2.069095000 | -1.462042000 |
| H | -3.561659000 | -1.458905000 | -1.283204000 |
| H | -2.678317000 | -2.423766000 | -2.496233000 |
| H | -2.656940000 | -2.932058000 | -0.792864000 |

### PCox

E = -2.43869 Ha

|   |              |              |              |
|---|--------------|--------------|--------------|
| S | -1.555974000 | -0.718697000 | 0.554958000  |
| S | -0.128952000 | -0.242916000 | -0.972406000 |
| H | -0.198483000 | -1.056162000 | -3.183109000 |

|   |              |              |              |
|---|--------------|--------------|--------------|
| C | -0.823123000 | -1.258324000 | -2.309135000 |
| H | -0.762373000 | -2.320843000 | -2.066516000 |
| H | -1.852541000 | -0.970141000 | -2.533824000 |
| C | -0.949961000 | 0.590244000  | 1.677664000  |
| H | -1.145091000 | 1.563520000  | 1.223951000  |
| H | -1.530350000 | 0.470174000  | 2.595203000  |
| H | 0.111597000  | 0.447503000  | 1.886750000  |
| O | -1.261125000 | -2.027985000 | 1.206125000  |
| O | 0.912910000  | -2.268826000 | 3.387473000  |
| H | 0.247869000  | -2.351493000 | 2.686182000  |
| H | 1.365326000  | -3.120303000 | 3.385656000  |

### (PhS)<sub>2</sub>

**1**

E = -5.37216 Ha

|   |              |              |              |
|---|--------------|--------------|--------------|
| S | -1.518368000 | 0.229911000  | 0.409457000  |
| S | -0.816831000 | -0.917037000 | -1.158743000 |
| C | -3.280250000 | -0.063879000 | 0.495049000  |
| C | -3.805233000 | -1.330303000 | 0.784761000  |
| C | -4.146293000 | 1.025539000  | 0.339574000  |
| C | -5.181428000 | -1.501933000 | 0.905528000  |
| C | -5.523338000 | 0.849757000  | 0.480870000  |
| C | -6.043838000 | -0.412930000 | 0.758282000  |
| H | -3.135704000 | -2.175485000 | 0.912786000  |
| H | -3.740098000 | 2.005739000  | 0.107600000  |
| H | -5.582210000 | -2.488083000 | 1.127758000  |
| H | -6.188524000 | 1.701556000  | 0.361453000  |
| H | -7.117315000 | -0.550404000 | 0.860653000  |
| C | -1.119204000 | 0.034643000  | -2.642543000 |
| C | -0.430729000 | 1.227478000  | -2.900880000 |
| C | -2.013911000 | -0.468722000 | -3.595113000 |
| C | -0.646471000 | 1.911275000  | -4.094302000 |
| C | -2.213179000 | 0.213272000  | -4.795949000 |
| C | -1.534984000 | 1.405070000  | -5.045783000 |
| H | 0.269689000  | 1.615114000  | -2.167212000 |
| H | -2.550769000 | -1.390888000 | -3.393066000 |
| H | -0.110310000 | 2.837348000  | -4.287586000 |
| H | -2.907687000 | -0.185353000 | -5.531513000 |
| H | -1.695401000 | 1.938698000  | -5.979215000 |

### RCox

E = -6.02775 Ha

|   |              |              |              |
|---|--------------|--------------|--------------|
| S | -1.542611000 | 0.307859000  | 0.400690000  |
| S | -0.785513000 | -0.831814000 | -1.155745000 |
| O | 0.452764000  | 4.098255000  | -0.343897000 |
| O | -0.878506000 | 3.979244000  | 0.245588000  |
| H | 0.967233000  | 4.337356000  | 0.444136000  |
| H | -0.993953000 | 3.012190000  | 0.225097000  |
| C | -3.295288000 | -0.036117000 | 0.474670000  |
| C | -3.764971000 | -1.245466000 | 1.004573000  |
| C | -4.208083000 | 0.940034000  | 0.055901000  |
| C | -5.134578000 | -1.475724000 | 1.104108000  |
| C | -5.578687000 | 0.707099000  | 0.170065000  |
| C | -6.043670000 | -0.500101000 | 0.689537000  |
| H | -3.056974000 | -1.999016000 | 1.336317000  |
| H | -3.846455000 | 1.876779000  | -0.357203000 |
| H | -5.493424000 | -2.416114000 | 1.515354000  |
| H | -6.281957000 | 1.470216000  | -0.154055000 |
| H | -7.112245000 | -0.681005000 | 0.774440000  |
| C | -1.132993000 | 0.066884000  | -2.660551000 |

|   |              |              |              |
|---|--------------|--------------|--------------|
| C | -0.436349000 | 1.237670000  | -2.989044000 |
| C | -2.072701000 | -0.457695000 | -3.557605000 |
| C | -0.690747000 | 1.880852000  | -4.197500000 |
| C | -2.309501000 | 0.183104000  | -4.773683000 |
| C | -1.623832000 | 1.354281000  | -5.093032000 |
| H | 0.296843000  | 1.645308000  | -2.300459000 |
| H | -2.612889000 | -1.364058000 | -3.300699000 |
| H | -0.152321000 | 2.792954000  | -4.442434000 |
| H | -3.037722000 | -0.230912000 | -5.466866000 |
| H | -1.814460000 | 1.856724000  | -6.038069000 |

**TSox**

E = -5.98657 Ha  
nimag = -309.00 cm<sup>-1</sup>

|   |             |              |              |
|---|-------------|--------------|--------------|
| S | 3.667491000 | 0.983851000  | 14.275032000 |
| S | 5.023148000 | 0.759873000  | 15.993809000 |
| C | 4.074007000 | -0.590116000 | 13.540476000 |
| C | 3.174433000 | -1.648498000 | 13.694240000 |
| C | 3.460155000 | -2.882517000 | 13.112685000 |
| C | 4.636222000 | -3.058278000 | 12.384694000 |
| C | 5.528451000 | -1.996374000 | 12.232503000 |
| C | 5.252265000 | -0.757658000 | 12.806444000 |
| C | 4.381271000 | 2.009755000  | 17.074160000 |
| C | 5.128473000 | 3.176760000  | 17.297691000 |
| C | 4.669526000 | 4.139182000  | 18.194806000 |
| C | 3.459540000 | 3.954918000  | 18.863812000 |
| C | 2.709236000 | 2.799091000  | 18.638926000 |
| C | 3.166052000 | 1.826905000  | 17.753593000 |
| H | 2.257253000 | -1.505171000 | 14.256879000 |
| H | 2.758033000 | -3.704245000 | 13.226445000 |
| H | 4.855855000 | -4.021427000 | 11.931360000 |
| H | 6.443355000 | -2.129194000 | 11.660925000 |
| H | 5.937652000 | 0.073146000  | 12.678413000 |
| H | 6.066110000 | 3.320485000  | 16.769440000 |
| H | 5.257018000 | 5.037787000  | 18.365561000 |
| H | 3.101527000 | 4.709207000  | 19.559758000 |
| H | 1.767226000 | 2.650241000  | 19.160767000 |
| H | 2.589711000 | 0.921628000  | 17.589978000 |
| O | 3.622722000 | 1.864623000  | 12.586732000 |
| O | 2.657233000 | 2.510172000  | 10.994676000 |
| H | 3.292886000 | 2.750958000  | 12.809330000 |
| H | 3.390288000 | 2.275085000  | 10.405984000 |

**PCox**

E = -6.10923 Ha

|   |              |              |              |
|---|--------------|--------------|--------------|
| S | -2.725169000 | -1.103579000 | 0.606740000  |
| S | -1.521077000 | -2.772714000 | -0.119809000 |
| O | -2.212331000 | -4.073628000 | 0.095463000  |
| C | -1.763778000 | -2.308499000 | -1.861638000 |
| C | -2.737524000 | -2.955774000 | -2.619722000 |
| C | -0.900820000 | -1.374734000 | -2.439467000 |
| C | -2.863343000 | -2.642392000 | -3.972653000 |
| C | -1.033790000 | -1.071524000 | -3.792632000 |
| C | -2.016030000 | -1.701992000 | -4.558758000 |
| H | -3.377537000 | -3.698128000 | -2.153529000 |
| H | -0.135642000 | -0.885961000 | -1.841970000 |
| H | -3.624744000 | -3.137903000 | -4.569828000 |
| H | -0.366971000 | -0.344625000 | -4.249268000 |
| H | -2.115761000 | -1.464065000 | -5.614654000 |
| C | -2.290333000 | -1.114012000 | 2.329472000  |
| C | -2.981446000 | -1.938488000 | 3.229502000  |

|   |              |              |             |
|---|--------------|--------------|-------------|
| C | -1.288879000 | -0.253146000 | 2.803603000 |
| C | -2.662614000 | -1.905003000 | 4.585623000 |
| C | -0.982694000 | -0.221205000 | 4.162164000 |
| C | -1.666717000 | -1.048051000 | 5.054342000 |
| H | -3.758802000 | -2.603721000 | 2.869707000 |
| H | -0.759421000 | 0.389832000  | 2.106913000 |
| H | -3.197005000 | -2.553487000 | 5.275081000 |
| H | -0.207631000 | 0.450260000  | 4.523389000 |
| H | -1.424355000 | -1.023050000 | 6.113845000 |
| O | -4.124097000 | -5.451983000 | 2.208314000 |
| H | -3.518976000 | -5.102937000 | 1.537728000 |
| H | -4.426675000 | -6.288846000 | 1.836944000 |

**(HSe)<sub>2</sub>**

**1**

E = -5.37216 Ha

|    |              |              |              |
|----|--------------|--------------|--------------|
| Se | -2.742193000 | -0.752281000 | -0.012941000 |
| Se | -0.584202000 | 0.170296000  | -0.013865000 |
| H  | -0.016231000 | -0.717263000 | 1.024854000  |
| H  | -3.310999000 | 0.139063000  | 1.022063000  |

**RCox**

E = -1.12640 Ha

|    |              |              |              |
|----|--------------|--------------|--------------|
| Se | -1.491906000 | 0.064854000  | 0.710367000  |
| Se | -0.707937000 | -0.903809000 | -1.282901000 |
| O  | 0.265090000  | 3.840697000  | -0.834213000 |
| O  | -1.115975000 | 3.733855000  | -0.368630000 |
| H  | 0.624969000  | 4.442764000  | -0.162833000 |
| H  | -1.117089000 | 2.818160000  | -0.036271000 |
| H  | -2.917449000 | 0.141222000  | 0.320807000  |
| H  | -0.423393000 | 0.366940000  | -1.982843000 |

**TSox**

E = -1.09168 Ha  
nimag = -395.27 cm<sup>-1</sup>

|    |             |              |             |
|----|-------------|--------------|-------------|
| O  | 6.798176000 | -2.002336000 | 1.570202000 |
| O  | 8.062610000 | -3.587579000 | 1.467724000 |
| H  | 7.738382000 | -1.815531000 | 1.378491000 |
| H  | 7.837907000 | -3.877845000 | 2.365794000 |
| Se | 5.665014000 | -0.752192000 | 0.546651000 |
| Se | 4.351687000 | 1.297315000  | 0.919046000 |
| H  | 4.535484000 | -1.513180000 | 1.098343000 |
| H  | 5.308601000 | 2.071269000  | 0.108516000 |

**PCox**

E = -1.18139 Ha

|    |             |              |              |
|----|-------------|--------------|--------------|
| O  | 5.457713000 | -2.101569000 | 1.173534000  |
| O  | 8.370205000 | -2.412259000 | 2.156370000  |
| H  | 7.421377000 | -2.453988000 | 1.959451000  |
| H  | 8.485112000 | -3.017887000 | 2.897781000  |
| Se | 5.443608000 | -0.829610000 | 0.122101000  |
| Se | 4.686674000 | 1.229626000  | 1.213062000  |
| H  | 4.047801000 | -0.879233000 | -0.480248000 |
| H  | 6.082908000 | 1.576210000  | 1.534704000  |

**(CH<sub>3</sub>Se)<sub>2</sub>**

**1**

E = -1.64519 Ha

|    |              |             |              |
|----|--------------|-------------|--------------|
| Se | -5.224537500 | 2.602743320 | -0.901066440 |
| Se | -6.839496350 | 2.559567210 | 0.795626350  |
| C  | -7.956081120 | 4.114665070 | 0.272172670  |
| C  | -4.061575390 | 4.076464340 | -0.256184650 |
| H  | -8.231619390 | 4.029417130 | -0.779361390 |
| H  | -7.418294250 | 5.046241870 | 0.455916290  |
| H  | -8.852873240 | 4.079808980 | 0.897433720  |
| H  | -3.796404840 | 3.902468660 | 0.787036860  |
| H  | -4.567806900 | 5.036339230 | -0.370871050 |
| H  | -3.161981460 | 4.059726220 | -0.878103710 |

**RCox**

E = -2.30236 Ha

|    |              |              |              |
|----|--------------|--------------|--------------|
| Se | -1.470052000 | 0.148807000  | 0.625721000  |
| Se | -0.712542000 | -1.004939000 | -1.255431000 |
| O  | 0.163707000  | 3.931209000  | -0.816876000 |
| O  | -1.095184000 | 3.758968000  | -0.096148000 |
| H  | 0.693621000  | 4.370869000  | -0.132401000 |
| H  | -1.079821000 | 2.794895000  | 0.061591000  |
| C  | -3.433317000 | 0.113073000  | 0.398719000  |
| H  | -3.726634000 | 0.686414000  | -0.480097000 |
| H  | -3.772483000 | -0.919843000 | 0.327950000  |
| H  | -3.838051000 | 0.580525000  | 1.301032000  |
| C  | -0.597983000 | 0.403032000  | -2.635310000 |
| H  | -0.183823000 | -0.102738000 | -3.512572000 |
| H  | -1.588431000 | 0.792864000  | -2.868316000 |
| H  | 0.072617000  | 1.197199000  | -2.311110000 |

**TSox**

E = -2.26895 Ha

nimag = -314.22 cm<sup>-1</sup>

|    |              |              |              |
|----|--------------|--------------|--------------|
| Se | -1.443185000 | -0.455340000 | 0.828376000  |
| Se | -1.136743000 | -1.119787000 | -1.494452000 |
| O  | -0.977082000 | -1.179168000 | 2.637623000  |
| O  | -0.342336000 | -1.029079000 | 4.539339000  |
| H  | -0.022792000 | -1.350111000 | 2.704001000  |
| H  | -1.001082000 | -1.665818000 | 4.855394000  |
| C  | 0.018865000  | 0.850198000  | 0.783355000  |
| H  | -0.215260000 | 1.611913000  | 0.039849000  |
| H  | 0.044914000  | 1.277194000  | 1.786222000  |
| H  | 0.960875000  | 0.351980000  | 0.550899000  |
| C  | -2.798979000 | -2.160216000 | -1.641260000 |
| H  | -3.665251000 | -1.525528000 | -1.454197000 |
| H  | -2.821214000 | -2.523624000 | -2.671040000 |
| H  | -2.774756000 | -3.009200000 | -0.957625000 |

**PCox**

E = -2.36543 Ha

|    |              |              |              |
|----|--------------|--------------|--------------|
| Se | -1.642869000 | -0.728916000 | 0.626401000  |
| Se | -0.035694000 | -0.169406000 | -1.129855000 |
| H  | -0.243415000 | -1.151560000 | -3.408413000 |
| C  | -0.853416000 | -1.304282000 | -2.515462000 |
| H  | -0.808987000 | -2.351412000 | -2.216516000 |
| H  | -1.878131000 | -0.990483000 | -2.716440000 |
| C  | -0.892169000 | 0.620848000  | 1.874664000  |
| H  | -1.035704000 | 1.612534000  | 1.443265000  |
| H  | -1.464781000 | 0.503850000  | 2.796304000  |

|   |              |              |             |
|---|--------------|--------------|-------------|
| H | 0.158803000  | 0.392664000  | 2.048368000 |
| O | -1.251416000 | -2.184389000 | 1.313913000 |
| O | 0.867084000  | -2.224450000 | 3.448604000 |
| H | 0.201763000  | -2.341745000 | 2.748728000 |
| H | 1.350306000  | -3.058613000 | 3.457616000 |

**(PhSe)<sub>2</sub>****1**

E = -5.31496 Ha

|    |              |              |              |
|----|--------------|--------------|--------------|
| Se | -1.479625000 | 0.268789000  | 0.564922000  |
| Se | -0.723366000 | -1.051316000 | -1.237876000 |
| C  | -3.385211000 | -0.090490000 | 0.621032000  |
| C  | -3.873618000 | -1.250809000 | 1.232266000  |
| C  | -4.279173000 | 0.852394000  | 0.101671000  |
| C  | -5.248278000 | -1.467545000 | 1.314512000  |
| C  | -5.654193000 | 0.632338000  | 0.193159000  |
| C  | -6.140396000 | -0.527152000 | 0.796494000  |
| H  | -3.181301000 | -1.980319000 | 1.641773000  |
| H  | -3.901699000 | 1.753168000  | -0.373012000 |
| H  | -5.622728000 | -2.371097000 | 1.789873000  |
| H  | -6.344602000 | 1.368710000  | -0.211383000 |
| H  | -7.211922000 | -0.697572000 | 0.865157000  |
| C  | -1.050389000 | 0.065854000  | -2.789577000 |
| C  | -0.197413000 | 1.131520000  | -3.098167000 |
| C  | -2.114944000 | -0.243932000 | -3.643023000 |
| C  | -0.416020000 | 1.885856000  | -4.249758000 |
| C  | -2.322511000 | 0.509499000  | -4.799336000 |
| C  | -1.476822000 | 1.575829000  | -5.102733000 |
| H  | 0.633583000  | 1.368971000  | -2.440713000 |
| H  | -2.779025000 | -1.069154000 | -3.403638000 |
| H  | 0.248916000  | 2.713740000  | -4.484459000 |
| H  | -3.150422000 | 0.263293000  | -5.460018000 |
| H  | -1.641759000 | 2.163524000  | -6.002355000 |

**RCox**

E = -5.97097 Ha

|    |              |              |              |
|----|--------------|--------------|--------------|
| Se | -1.473578000 | 0.245765000  | 0.586995000  |
| Se | -0.700390000 | -1.041522000 | -1.239219000 |
| O  | 0.356382000  | 4.197394000  | -0.432735000 |
| O  | -1.034650000 | 3.993412000  | -0.035505000 |
| H  | 0.717358000  | 4.558435000  | 0.393138000  |
| H  | -1.062813000 | 3.020364000  | 0.017212000  |
| C  | -3.384898000 | -0.083852000 | 0.613206000  |
| C  | -3.888852000 | -1.236907000 | 1.225461000  |
| C  | -4.263106000 | 0.861899000  | 0.073138000  |
| C  | -5.265961000 | -1.443080000 | 1.289833000  |
| C  | -5.640539000 | 0.651140000  | 0.146628000  |
| C  | -6.143353000 | -0.500139000 | 0.751954000  |
| H  | -3.207786000 | -1.968800000 | 1.649307000  |
| H  | -3.876284000 | 1.757057000  | -0.404057000 |
| H  | -5.653503000 | -2.340452000 | 1.766216000  |
| H  | -6.319506000 | 1.389404000  | -0.273142000 |
| H  | -7.216926000 | -0.662216000 | 0.806554000  |
| C  | -1.056543000 | 0.069429000  | -2.786033000 |
| C  | -0.218803000 | 1.143609000  | -3.106028000 |
| C  | -2.128196000 | -0.256620000 | -3.625064000 |
| C  | -0.461075000 | 1.892290000  | -4.256327000 |
| C  | -2.356861000 | 0.490346000  | -4.781163000 |
| C  | -1.527139000 | 1.566101000  | -5.096098000 |
| H  | 0.614454000  | 1.397812000  | -2.458474000 |

|   |              |              |              |
|---|--------------|--------------|--------------|
| H | -2.779949000 | -1.088377000 | -3.374992000 |
| H | 0.187110000  | 2.731538000  | -4.495827000 |
| H | -3.189340000 | 0.232905000  | -5.431638000 |
| H | -1.710765000 | 2.150845000  | -5.993982000 |

### TSox

E = -5.93734 Ha  
nimag = -286.94 cm<sup>-1</sup>

|    |             |              |              |
|----|-------------|--------------|--------------|
| O  | 6.780690000 | -2.046856000 | 1.516744000  |
| O  | 8.181213000 | -3.481094000 | 1.648677000  |
| H  | 7.670354000 | -1.655432000 | 1.485582000  |
| H  | 7.769603000 | -3.858370000 | 2.440842000  |
| Se | 5.602097000 | -0.786833000 | 0.472550000  |
| H  | 1.543266000 | -3.350010000 | -1.005268000 |
| H  | 0.979903000 | -4.198135000 | 1.262819000  |
| H  | 4.377897000 | -2.121042000 | 2.886532000  |
| H  | 2.400143000 | -3.578248000 | 3.205475000  |
| C  | 4.054784000 | -1.907662000 | 0.763022000  |
| C  | 3.750439000 | -2.380547000 | 2.041096000  |
| C  | 2.639706000 | -3.205207000 | 2.212970000  |
| C  | 1.842974000 | -3.552682000 | 1.121714000  |
| C  | 2.156566000 | -3.076317000 | -0.150697000 |
| C  | 3.265126000 | -2.250715000 | -0.336479000 |
| H  | 3.512397000 | -1.885254000 | -1.328486000 |
| Se | 4.392770000 | 1.318130000  | 0.960223000  |
| C  | 5.751441000 | 2.536015000  | 0.346782000  |
| C  | 5.900725000 | 2.808934000  | -1.019723000 |
| C  | 6.857997000 | 3.728801000  | -1.444061000 |
| C  | 7.665813000 | 4.383363000  | -0.513114000 |
| C  | 7.515985000 | 4.114789000  | 0.847513000  |
| C  | 6.564528000 | 3.191979000  | 1.280652000  |
| H  | 5.267265000 | 2.308005000  | -1.745313000 |
| H  | 6.969428000 | 3.936454000  | -2.505425000 |
| H  | 8.409942000 | 5.101562000  | -0.847706000 |
| H  | 8.142943000 | 4.621539000  | 1.576994000  |
| H  | 6.451390000 | 2.980914000  | 2.339660000  |

### PCox

E = -6.03528 Ha

|    |              |              |              |
|----|--------------|--------------|--------------|
| Se | -2.852955000 | -0.928661000 | 0.673063000  |
| Se | -1.580224000 | -2.884668000 | -0.156751000 |
| O  | -2.522615000 | -4.242101000 | -0.064295000 |
| C  | -1.745909000 | -2.345178000 | -2.049843000 |
| C  | -2.645894000 | -3.030697000 | -2.859446000 |
| C  | -0.905598000 | -1.358105000 | -2.564931000 |
| C  | -2.716901000 | -2.706045000 | -4.214768000 |
| C  | -0.982052000 | -1.045927000 | -3.921995000 |
| C  | -1.888293000 | -1.716819000 | -4.745140000 |
| H  | -3.270802000 | -3.808642000 | -2.430522000 |
| H  | -0.202205000 | -0.830837000 | -1.925291000 |
| H  | -3.419922000 | -3.231266000 | -4.856689000 |
| H  | -0.332826000 | -0.277903000 | -4.334860000 |
| H  | -1.945072000 | -1.469949000 | -5.802208000 |
| C  | -2.307171000 | -1.028160000 | 2.520347000  |
| C  | -2.911730000 | -1.942913000 | 3.391957000  |
| C  | -1.334273000 | -0.140469000 | 2.998827000  |
| C  | -2.532169000 | -1.970100000 | 4.733554000  |
| C  | -0.973239000 | -0.166545000 | 4.345305000  |
| C  | -1.568574000 | -1.082589000 | 5.213147000  |
| H  | -3.664060000 | -2.635225000 | 3.029982000  |
| H  | -0.865817000 | 0.567847000  | 2.322127000  |

|   |              |              |             |
|---|--------------|--------------|-------------|
| H | -2.996328000 | -2.690198000 | 5.402606000 |
| H | -0.221614000 | 0.527587000  | 4.713437000 |
| H | -1.281042000 | -1.105155000 | 6.261323000 |
| O | -3.985406000 | -5.419099000 | 2.356322000 |
| H | -3.511368000 | -5.096677000 | 1.572577000 |
| H | -4.599910000 | -6.072927000 | 2.003364000 |

### (HTe)<sub>2</sub>

#### 1

E = -0.41752 Ha

|    |              |              |              |
|----|--------------|--------------|--------------|
| Te | -1.485655000 | 0.191297000  | 0.759160000  |
| Te | -0.852858000 | -1.372514000 | -1.389985000 |
| H  | -1.021370000 | -0.164315000 | -2.536404000 |
| H  | -3.131553000 | -0.110912000 | 0.713071000  |

### RCox

E = -1.07279 Ha

|    |              |              |              |
|----|--------------|--------------|--------------|
| Te | -1.565313000 | 0.111298000  | 0.882303000  |
| Te | -0.644204000 | -0.997447000 | -1.442701000 |
| O  | 0.301504000  | 3.998564000  | -0.894072000 |
| O  | -1.069568000 | 3.928781000  | -0.393378000 |
| H  | 0.695856000  | 4.585101000  | -0.228397000 |
| H  | -1.089577000 | 3.011189000  | -0.066104000 |
| H  | -3.170634000 | 0.197270000  | 0.414858000  |
| H  | -0.336000000 | 0.459627000  | -2.203032000 |

### TSox

E = -1.04811 Ha  
nimag = -254.07

|    |             |              |              |
|----|-------------|--------------|--------------|
| O  | 7.050292000 | -2.156429000 | 1.601103000  |
| O  | 8.170676000 | -3.841023000 | 1.562627000  |
| H  | 7.974642000 | -1.938388000 | 1.392302000  |
| H  | 7.895885000 | -4.081574000 | 2.461288000  |
| Te | 5.750037000 | -0.882755000 | 0.500456000  |
| Te | 4.220724000 | 1.480260000  | 0.948892000  |
| H  | 4.574067000 | -1.682875000 | 1.360994000  |
| H  | 5.180958000 | 2.283617000  | -0.152702000 |

### PCox

E = -1.13173 Ha

|    |             |              |              |
|----|-------------|--------------|--------------|
| O  | 5.582668000 | -2.280831000 | 1.325999000  |
| O  | 8.464252000 | -2.776644000 | 2.013025000  |
| H  | 7.498664000 | -2.724956000 | 1.906906000  |
| H  | 8.586222000 | -3.234569000 | 2.852548000  |
| Te | 5.526004000 | -0.957043000 | 0.066557000  |
| Te | 4.576258000 | 1.427130000  | 1.268965000  |
| H  | 3.930162000 | -1.126883000 | -0.525735000 |
| H  | 6.158120000 | 1.907682000  | 1.486966000  |

### (CH<sub>3</sub>Te)<sub>2</sub>

#### 1

E = -1.59683 Ha

|    |              |              |              |
|----|--------------|--------------|--------------|
| Te | -1.517742000 | 0.244415000  | 0.780837000  |
| Te | -0.649309000 | -1.113039000 | -1.399234000 |
| C  | -3.675922000 | 0.126504000  | 0.498822000  |



|   |              |              |              |
|---|--------------|--------------|--------------|
| H | -3.964484000 | 0.691693000  | -0.386099000 |
| H | -3.969673000 | -0.918563000 | 0.413828000  |
| H | -4.120160000 | 0.571873000  | 1.392649000  |
| C | -0.503805000 | 0.504063000  | -2.853474000 |
| H | -0.070385000 | 0.060161000  | -3.753324000 |
| H | -1.495970000 | 0.897755000  | -3.068842000 |
| H | 0.153227000  | 1.279513000  | -2.462765000 |

**RCox**

E = -2.25327 Ha

|    |              |              |              |
|----|--------------|--------------|--------------|
| Te | -1.522762000 | 0.186186000  | 0.817110000  |
| Te | -0.653916000 | -1.107283000 | -1.408251000 |
| O  | 0.211634000  | 4.059993000  | -0.881054000 |
| O  | -1.097068000 | 3.927263000  | -0.245678000 |
| H  | 0.680199000  | 4.571002000  | -0.201446000 |
| H  | -1.081573000 | 2.981573000  | 0.000341000  |
| C  | -3.675538000 | 0.188284000  | 0.479083000  |
| H  | -3.909581000 | 0.788555000  | -0.398548000 |
| H  | -4.016438000 | -0.838899000 | 0.359508000  |
| H  | -4.120186000 | 0.634233000  | 1.372234000  |
| C  | -0.457876000 | 0.542924000  | -2.814104000 |
| H  | -0.022458000 | 0.103825000  | -3.715358000 |
| H  | -1.439017000 | 0.959330000  | -3.036035000 |
| H  | 0.208509000  | 1.298337000  | -2.402394000 |

**TSox**

E = -2.22996 Ha

|    |             |              |              |
|----|-------------|--------------|--------------|
| O  | 7.051774000 | -2.213677000 | 1.617695000  |
| O  | 8.122782000 | -3.843157000 | 1.801351000  |
| H  | 7.947255000 | -1.851130000 | 1.532017000  |
| H  | 7.769344000 | -4.015927000 | 2.687569000  |
| Te | 5.734189000 | -0.874509000 | 0.491073000  |
| Te | 4.296308000 | 1.499547000  | 0.999247000  |
| C  | 4.181375000 | -2.162455000 | 1.234873000  |
| H  | 3.275822000 | -1.988355000 | 0.656547000  |
| H  | 4.558330000 | -3.175511000 | 1.092926000  |
| H  | 4.024893000 | -1.958510000 | 2.293481000  |
| C  | 5.063094000 | 2.579827000  | -0.724214000 |
| H  | 6.143082000 | 2.693164000  | -0.639852000 |
| H  | 4.787117000 | 2.059931000  | -1.640165000 |
| H  | 4.587258000 | 3.561845000  | -0.689427000 |

**PCox**

E = -2.31840 Ha

|    |              |              |              |
|----|--------------|--------------|--------------|
| Te | -1.796357000 | -0.750853000 | 0.740342000  |
| Te | 0.115449000  | -0.137964000 | -1.255297000 |
| H  | -0.256029000 | -1.203080000 | -3.686520000 |
| C  | -0.853932000 | -1.341535000 | -2.783978000 |
| H  | -0.840327000 | -2.389305000 | -2.487615000 |
| H  | -1.869078000 | -0.986426000 | -2.956560000 |
| C  | -0.945086000 | 0.699973000  | 2.116408000  |
| H  | -0.971201000 | 1.691108000  | 1.661771000  |
| H  | -1.569393000 | 0.664152000  | 3.010980000  |
| H  | 0.069714000  | 0.379543000  | 2.351194000  |
| O  | -1.312575000 | -2.335433000 | 1.526817000  |
| O  | 0.982471000  | -2.195602000 | 3.364993000  |
| H  | 0.236793000  | -2.364142000 | 2.758389000  |
| H  | 1.557181000  | -2.960998000 | 3.250578000  |

**(PhTe)<sub>2</sub>**

**1**

E = -5.26294 Ha

|    |              |              |              |
|----|--------------|--------------|--------------|
| Te | -1.020058000 | 0.910542000  | -1.710152000 |
| Te | 1.020058000  | -0.910542000 | -1.710152000 |
| C  | -2.313987000 | 0.132907000  | -0.182432000 |
| C  | -2.253667000 | 0.655953000  | 1.114445000  |
| C  | -3.256999000 | -0.855773000 | -0.486159000 |
| C  | -3.126933000 | 0.188894000  | 2.098139000  |
| C  | -4.125284000 | -1.320943000 | 0.501931000  |
| C  | -4.062195000 | -0.800011000 | 1.794560000  |
| H  | -1.526620000 | 1.424086000  | 1.360955000  |
| H  | -3.315540000 | -1.265182000 | -1.490293000 |
| H  | -3.073163000 | 0.600170000  | 3.103566000  |
| H  | -4.854037000 | -2.090550000 | 0.257960000  |
| H  | -4.741062000 | -1.162891000 | 2.562322000  |
| C  | 2.313987000  | -0.132907000 | -0.182432000 |
| C  | 2.253667000  | -0.655953000 | 1.114445000  |
| C  | 3.256999000  | 0.855773000  | -0.486159000 |
| C  | 3.126933000  | -0.188894000 | 2.098139000  |
| C  | 4.125284000  | 1.320943000  | 0.501931000  |
| C  | 4.062195000  | 0.800011000  | 1.794560000  |
| H  | 1.526620000  | -1.424086000 | 1.360955000  |
| H  | 3.315540000  | 1.265182000  | -1.490293000 |
| H  | 3.073163000  | -0.600170000 | 3.103566000  |
| H  | 4.854037000  | 2.090550000  | 0.257960000  |
| H  | 4.741062000  | 1.162891000  | 2.562322000  |

**RCox**

E = -5.91889 Ha

|    |              |              |              |
|----|--------------|--------------|--------------|
| Te | -1.461634000 | 0.279813000  | 0.784829000  |
| Te | -0.619375000 | -1.211748000 | -1.354041000 |
| O  | 0.222084000  | 4.362474000  | -0.738937000 |
| O  | -1.166568000 | 4.129323000  | -0.349112000 |
| H  | 0.538575000  | 4.843603000  | 0.042712000  |
| H  | -1.144419000 | 3.169106000  | -0.179280000 |
| C  | -3.579281000 | -0.074163000 | 0.780838000  |
| C  | -4.106350000 | -1.174120000 | 1.467176000  |
| C  | -4.441286000 | 0.818375000  | 0.133625000  |
| C  | -5.485656000 | -1.381264000 | 1.498796000  |
| C  | -5.820268000 | 0.606138000  | 0.170685000  |
| C  | -6.344078000 | -0.492697000 | 0.851106000  |
| H  | -3.446036000 | -1.870793000 | 1.975109000  |
| H  | -4.045075000 | 1.675651000  | -0.402068000 |
| H  | -5.887962000 | -2.238835000 | 2.033065000  |
| H  | -6.483992000 | 1.303440000  | -0.335138000 |
| C  | -0.988582000 | 0.109061000  | -3.002662000 |
| C  | -0.097617000 | 1.145193000  | -3.303884000 |
| C  | -2.108077000 | -0.103494000 | -3.815801000 |
| C  | -0.332743000 | 1.967655000  | -4.405322000 |
| C  | -2.331950000 | 0.717558000  | -4.922033000 |
| C  | -1.447322000 | 1.754463000  | -5.216501000 |
| H  | 0.773656000  | 1.319773000  | -2.680292000 |
| H  | -2.807110000 | -0.902673000 | -3.587684000 |
| H  | 0.357767000  | 2.777961000  | -4.625857000 |
| H  | -3.203740000 | 0.547308000  | -5.549541000 |
| H  | -1.627107000 | 2.397054000  | -6.074773000 |
| H  | -7.418614000 | -0.655623000 | 0.877996000  |

**TSox**

E = -5.89608 Ha

nimag = -142.59 cm<sup>-1</sup>

|    |             |              |              |
|----|-------------|--------------|--------------|
| Te | 3.477109000 | 1.025531000  | 14.124950000 |
| Te | 5.241878000 | 0.659328000  | 16.331312000 |
| C  | 3.985990000 | -0.859641000 | 13.261437000 |
| C  | 3.313710000 | -2.007931000 | 13.690181000 |
| C  | 3.627378000 | -3.243688000 | 13.124052000 |
| C  | 4.606015000 | -3.333745000 | 12.134840000 |
| C  | 5.271599000 | -2.184593000 | 11.709114000 |
| C  | 4.965963000 | -0.943639000 | 12.268728000 |
| C  | 4.351200000 | 2.175174000  | 17.545307000 |
| C  | 4.961696000 | 3.431624000  | 17.649487000 |
| C  | 4.407835000 | 4.411196000  | 18.474797000 |
| C  | 3.244225000 | 4.146585000  | 19.196282000 |
| C  | 2.634598000 | 2.895985000  | 19.093821000 |
| C  | 3.184542000 | 1.910318000  | 18.274265000 |
| H  | 2.547348000 | -1.947188000 | 14.457050000 |
| H  | 3.099748000 | -4.134462000 | 13.455765000 |
| H  | 4.847257000 | -4.297601000 | 11.693963000 |
| H  | 6.033802000 | -2.248839000 | 10.936391000 |
| H  | 5.479459000 | -0.052396000 | 11.925166000 |
| H  | 5.866437000 | 3.647577000  | 17.089414000 |
| H  | 4.888870000 | 5.383503000  | 18.550033000 |
| H  | 2.814044000 | 4.911927000  | 19.837240000 |
| H  | 1.728268000 | 2.682176000  | 19.655345000 |
| H  | 2.706313000 | 0.938003000  | 18.206688000 |
| O  | 3.543470000 | 1.892424000  | 12.081151000 |
| O  | 2.756826000 | 2.421522000  | 10.414331000 |
| H  | 3.567859000 | 2.850406000  | 12.227162000 |
| H  | 3.341086000 | 1.836531000  | 9.908434000  |

**PCox**

E = -5.98702 Ha

|    |              |              |              |
|----|--------------|--------------|--------------|
| Te | -2.936008000 | -0.742057000 | 0.736334000  |
| Te | -1.458348000 | -2.982121000 | -0.208181000 |
| C  | -1.697141000 | -2.425919000 | -2.285612000 |
| C  | -2.609702000 | -3.150834000 | -3.049769000 |
| C  | -0.912927000 | -1.423414000 | -2.860031000 |
| C  | -2.747351000 | -2.856340000 | -4.407272000 |
| C  | -1.055888000 | -1.138755000 | -4.218412000 |
| C  | -1.973387000 | -1.852927000 | -4.990562000 |
| H  | -3.198912000 | -3.937190000 | -2.585279000 |
| H  | -0.197602000 | -0.859050000 | -2.266359000 |
| H  | -3.460309000 | -3.415308000 | -5.008731000 |
| H  | -0.449321000 | -0.358569000 | -4.671824000 |
| H  | -2.082027000 | -1.628371000 | -6.048627000 |
| C  | -2.331511000 | -0.962504000 | 2.775795000  |
| C  | -2.890280000 | -1.966327000 | 3.576714000  |
| C  | -1.403835000 | -0.066276000 | 3.322045000  |
| C  | -2.510049000 | -2.072338000 | 4.915339000  |
| C  | -1.041774000 | -0.173030000 | 4.665276000  |
| C  | -1.591679000 | -1.176778000 | 5.462520000  |
| H  | -3.607224000 | -2.670988000 | 3.169103000  |
| H  | -0.963878000 | 0.712002000  | 2.705754000  |
| H  | -2.939532000 | -2.861427000 | 5.527601000  |
| H  | -0.324154000 | 0.528177000  | 5.084739000  |
| H  | -1.303958000 | -1.261305000 | 6.507524000  |
| O  | -2.568729000 | -4.438775000 | -0.139456000 |
| O  | -4.031615000 | -5.355073000 | 2.295601000  |
| H  | -3.562264000 | -5.108753000 | 1.478170000  |
| H  | -4.739652000 | -5.934241000 | 1.991279000  |

**Table S4** Geometries of the stationary points and transition states for the oxidation of HXXH (X=S,Se,Te): level of theory ZORA-BLYP-D3(BJ)/TZ2P

## H<sub>2</sub>O<sub>2</sub>

E = -0.64253 Ha

|   |              |              |              |
|---|--------------|--------------|--------------|
| O | -1.354356000 | -0.038163000 | 0.326995000  |
| O | -0.859342000 | -0.665554000 | -0.937125000 |
| H | -2.312378000 | -0.209750000 | 0.226691000  |
| H | -0.556422000 | 0.137567000  | -1.406752000 |

## (HS)<sub>2</sub>

**1**

E = -0.51802 Ha

|   |              |              |              |
|---|--------------|--------------|--------------|
| S | -1.443752000 | 0.074374000  | 0.594321000  |
| S | -0.738883000 | -0.805274000 | -1.178787000 |
| H | -2.773932000 | 0.028911000  | 0.320549000  |
| H | -0.586419000 | 0.328129000  | -1.912635000 |

**RCox**

E = -1.16758 Ha

|   |              |              |              |
|---|--------------|--------------|--------------|
| S | -1.606302000 | 0.142926000  | 0.583068000  |
| S | -0.516875000 | -0.390759000 | -1.151891000 |
| O | -0.080791000 | 3.064008000  | -1.187656000 |
| O | -0.949812000 | 3.379620000  | -0.010539000 |
| H | 0.784433000  | 3.354506000  | -0.835175000 |
| H | -1.156725000 | 2.460981000  | 0.291850000  |

|   |              |             |              |
|---|--------------|-------------|--------------|
| H | -2.840032000 | 0.267730000 | 0.019585000  |
| H | -0.200547000 | 0.881825000 | -1.528884000 |

**TSox**

E = -1.13422 Ha

nimag = -401.09 cm<sup>-1</sup>

|   |             |              |              |
|---|-------------|--------------|--------------|
| O | 6.788400000 | -1.865600000 | 1.547800000  |
| O | 7.998300000 | -3.485200000 | 1.484200000  |
| H | 7.686100000 | -1.718600000 | 1.171100000  |
| H | 7.389300000 | -4.019400000 | 0.937000000  |
| S | 5.593800000 | -0.740100000 | 0.637200000  |
| S | 4.475300000 | 1.171400000  | 0.880900000  |
| H | 4.624400000 | -1.367800000 | 1.335700000  |
| H | 5.235000000 | 1.786500000  | -0.060100000 |

**PCox**

E = -1.23969 Ha

|   |             |              |              |
|---|-------------|--------------|--------------|
| O | 5.213022000 | -2.191307000 | 0.835268000  |
| O | 7.762842000 | -1.513166000 | 2.071731000  |
| H | 6.967960000 | -2.049229000 | 1.865128000  |
| H | 8.004658000 | -1.755446000 | 2.981051000  |
| S | 5.317447000 | -0.885539000 | 0.094824000  |
| S | 5.254506000 | 0.846659000  | 1.438289000  |
| H | 4.019176000 | -0.523731000 | -0.274404000 |
| H | 6.556625000 | 0.631914000  | 1.771982000  |

**(HSe)<sub>2</sub>****1**

E = -0.46413 Ha

|    |              |              |              |
|----|--------------|--------------|--------------|
| Se | -2.762077000 | -0.760680000 | -0.013049000 |
| Se | -0.564318000 | 0.178694000  | -0.013990000 |
| H  | -0.001421000 | -0.715891000 | 1.034082000  |
| H  | -3.325798000 | 0.137741000  | 1.031293000  |

**RCox**

E = -1.11611 Ha

|    |              |              |              |
|----|--------------|--------------|--------------|
| Se | -1.594313000 | 0.036286000  | 0.777578000  |
| Se | -0.590512000 | -0.607850000 | -1.301649000 |
| O  | -0.051357000 | 2.987381000  | -1.306212000 |
| O  | -0.896856000 | 3.319618000  | -0.117683000 |
| H  | 0.825077000  | 3.259969000  | -0.967099000 |
| H  | -1.093786000 | 2.407172000  | 0.210613000  |
| H  | -2.973994000 | 0.229404000  | 0.252346000  |
| H  | -0.236486000 | 0.786451000  | -1.691622000 |

**TSox**

E = -1.09020 Ha

nimag = -401.876 cm<sup>-1</sup>

|    |             |              |             |
|----|-------------|--------------|-------------|
| O  | 6.808011000 | -2.036985000 | 1.589231000 |
| O  | 8.101765000 | -3.620498000 | 1.451065000 |
| H  | 7.762615000 | -1.870359000 | 1.401034000 |
| H  | 7.871119000 | -3.934111000 | 2.347955000 |
| Se | 5.668486000 | -0.767005000 | 0.549242000 |
| Se | 4.337528000 | 1.326801000  | 0.915524000 |
| H  | 4.527656000 | -1.523919000 | 1.107599000 |
| H  | 5.328957000 | 2.101990000  | 0.130786000 |

**PCox**

E = -1.17068 Ha

|    |             |              |              |
|----|-------------|--------------|--------------|
| O  | 5.363590000 | -2.284247000 | 0.937615000  |
| O  | 7.648183000 | -1.220640000 | 2.290789000  |
| H  | 6.907966000 | -1.810516000 | 2.017053000  |
| H  | 7.740930000 | -1.355552000 | 3.248408000  |
| Se | 5.328420000 | -0.917197000 | -0.035513000 |
| Se | 4.979828000 | 1.093598000  | 1.381171000  |
| H  | 3.854244000 | -0.788302000 | -0.432041000 |
| H  | 6.374856000 | 0.898676000  | 1.856927000  |

**(HTe)<sub>2</sub>****1**

E = -0.41580 Ha

|    |              |              |              |
|----|--------------|--------------|--------------|
| Te | -1.490217000 | 0.202649000  | 0.774851000  |
| Te | -0.848188000 | -1.383920000 | -1.405605000 |
| H  | -1.021581000 | -0.162073000 | -2.552261000 |
| H  | -3.145343000 | -0.106162000 | 0.719752000  |

**RCox**

E = -1.06692 Ha

|    |              |              |              |
|----|--------------|--------------|--------------|
| Te | -1.638138000 | 0.073264000  | 0.953289000  |
| Te | -0.569796000 | -0.781529000 | -1.464294000 |
| O  | 0.014572000  | 3.102994000  | -1.423771000 |
| O  | -0.820449000 | 3.458379000  | -0.234977000 |
| H  | 0.894369000  | 3.376604000  | -1.094749000 |
| H  | -1.019028000 | 2.553806000  | 0.112199000  |
| H  | -3.206830000 | 0.294354000  | 0.380132000  |
| H  | -0.172845000 | 0.778479000  | -1.954151000 |

**TSox**

E = -1.05195 Ha

nimag = -267.81 cm<sup>-1</sup>

|    |             |              |              |
|----|-------------|--------------|--------------|
| O  | 7.064060000 | -2.184447000 | 1.620086000  |
| O  | 8.199349000 | -3.878452000 | 1.536492000  |
| H  | 8.003415000 | -1.994563000 | 1.409990000  |
| H  | 7.919534000 | -4.140021000 | 2.435794000  |
| Te | 5.760063000 | -0.895155000 | 0.504639000  |
| Te | 4.204889000 | 1.501471000  | 0.945397000  |
| H  | 4.575322000 | -1.691561000 | 1.376710000  |
| H  | 5.202540000 | 2.309894000  | -0.135772000 |

**PCox**

E = -1.12834 Ha

|    |             |              |              |
|----|-------------|--------------|--------------|
| O  | 5.306218000 | -2.479624000 | 1.136671000  |
| O  | 7.709727000 | -1.452230000 | 2.089754000  |
| H  | 6.931939000 | -2.062449000 | 2.038163000  |
| H  | 7.624929000 | -1.011266000 | 2.952092000  |
| Te | 5.501376000 | -1.039483000 | -0.020091000 |
| Te | 4.738198000 | 1.349944000  | 1.367234000  |
| H  | 3.919970000 | -0.990678000 | -0.703138000 |
| H  | 6.359381000 | 1.596578000  | 1.722628000  |

**Table S5** Geometries of the stationary points and transition states for the oxidation of substituted diselenides and ditellurides; level of theory ZORA-OLYP/TZ2P**(CH<sub>3</sub>PhSe)<sub>2</sub>****1**

E = -6.48976 Ha

|    |              |              |              |
|----|--------------|--------------|--------------|
| Se | -1.472895000 | 0.235764000  | 0.588523000  |
| Se | -0.703236000 | -1.053174000 | -1.244465000 |
| C  | -3.381979000 | -0.085278000 | 0.624627000  |
| C  | -3.894498000 | -1.227015000 | 1.250617000  |

|   |              |              |              |
|---|--------------|--------------|--------------|
| C | -4.265601000 | 0.848686000  | 0.076266000  |
| C | -5.270024000 | -1.426897000 | 1.320320000  |
| C | -5.641848000 | 0.639283000  | 0.157600000  |
| C | -6.170729000 | -0.498219000 | 0.778805000  |
| H | -3.218865000 | -1.960461000 | 1.680846000  |
| H | -3.885473000 | 1.737494000  | -0.418093000 |
| H | -5.649186000 | -2.322255000 | 1.808753000  |
| H | -6.313449000 | 1.377119000  | -0.275932000 |
| C | -1.038525000 | 0.065076000  | -2.785846000 |

|   |              |              |              |
|---|--------------|--------------|--------------|
| C | -0.170689000 | 1.111200000  | -3.120483000 |
| C | -2.126386000 | -0.214156000 | -3.617728000 |
| C | -0.400031000 | 1.867506000  | -4.264725000 |
| C | -2.339252000 | 0.545479000  | -4.768160000 |
| C | -1.486586000 | 1.600624000  | -5.111202000 |
| H | 0.679878000  | 1.338693000  | -2.485296000 |
| H | -2.807569000 | -1.022678000 | -3.369301000 |
| H | 0.281120000  | 2.681719000  | -4.502822000 |
| H | -3.189799000 | 0.312129000  | -5.404960000 |
| C | -7.658847000 | -0.709496000 | 0.888207000  |
| H | -8.205900000 | -0.108657000 | 0.156916000  |
| H | -7.926903000 | -1.759813000 | 0.736863000  |
| H | -8.020570000 | -0.424572000 | 1.884546000  |
| C | -1.725564000 | 2.436867000  | -6.341779000 |
| H | -0.831090000 | 2.478786000  | -6.973262000 |
| H | -2.546972000 | 2.042184000  | -6.944928000 |
| H | -1.974563000 | 3.470062000  | -6.071052000 |

**RCox**

E = -7.14725 Ha

|    |              |              |              |
|----|--------------|--------------|--------------|
| Se | -1.472895000 | 0.235764000  | 0.588523000  |
| Se | -0.703236000 | -1.053174000 | -1.244465000 |
| O  | 0.269841000  | 4.215667000  | -0.498867000 |
| O  | -1.112868000 | 3.965013000  | -0.099579000 |
| H  | 0.618991000  | 4.591161000  | 0.325627000  |
| H  | -1.106461000 | 2.991828000  | -0.036087000 |
| C  | -3.381979000 | -0.085278000 | 0.624627000  |
| C  | -3.894498000 | -1.227015000 | 1.250617000  |
| C  | -4.265601000 | 0.848686000  | 0.076266000  |
| C  | -5.270024000 | -1.426897000 | 1.320320000  |
| C  | -5.641848000 | 0.639283000  | 0.157600000  |
| C  | -6.170729000 | -0.498219000 | 0.778805000  |
| H  | -3.218865000 | -1.960461000 | 1.680846000  |
| H  | -3.885473000 | 1.737494000  | -0.418093000 |
| H  | -5.649186000 | -2.322255000 | 1.808753000  |
| H  | -6.313449000 | 1.377119000  | -0.275932000 |
| C  | -1.038525000 | 0.065076000  | -2.785846000 |
| C  | -0.170689000 | 1.111200000  | -3.120483000 |
| C  | -2.126386000 | -0.214156000 | -3.617728000 |
| C  | -0.400031000 | 1.867506000  | -4.264725000 |
| C  | -2.339252000 | 0.545479000  | -4.768160000 |
| C  | -1.486586000 | 1.600624000  | -5.111202000 |
| H  | 0.679878000  | 1.338693000  | -2.485296000 |
| H  | -2.807569000 | -1.022678000 | -3.369301000 |
| H  | 0.281120000  | 2.681719000  | -4.502822000 |
| H  | -3.189799000 | 0.312129000  | -5.404960000 |
| C  | -7.658847000 | -0.709496000 | 0.888207000  |
| H  | -8.205900000 | -0.108657000 | 0.156916000  |
| H  | -7.926903000 | -1.759813000 | 0.736863000  |
| H  | -8.020570000 | -0.424572000 | 1.884546000  |
| C  | -1.725564000 | 2.436867000  | -6.341779000 |
| H  | -0.831090000 | 2.478786000  | -6.973262000 |
| H  | -2.546972000 | 2.042184000  | -6.944928000 |
| H  | -1.974563000 | 3.470062000  | -6.071052000 |

**TSox**

E = -7.11416 Ha

nimag = -277.37 cm<sup>-1</sup>

|   |             |              |             |
|---|-------------|--------------|-------------|
| O | 6.779663000 | -2.038046000 | 1.522573000 |
| O | 8.183325000 | -3.456689000 | 1.722421000 |
| H | 7.661190000 | -1.629479000 | 1.496637000 |

|    |              |              |              |
|----|--------------|--------------|--------------|
| H  | 7.754249000  | -3.814476000 | 2.514184000  |
| Se | 5.590597000  | -0.792348000 | 0.456025000  |
| H  | 1.526693000  | -3.352245000 | -0.990682000 |
| H  | 4.372309000  | -2.125555000 | 2.879976000  |
| H  | 2.409487000  | -3.573211000 | 3.210503000  |
| C  | 4.049193000  | -1.911731000 | 0.756505000  |
| C  | 3.745444000  | -2.385716000 | 2.034123000  |
| C  | 2.637334000  | -3.208900000 | 2.211215000  |
| C  | 1.816875000  | -3.576076000 | 1.135379000  |
| C  | 2.142081000  | -3.085026000 | -0.134809000 |
| C  | 3.247611000  | -2.259792000 | -0.331353000 |
| H  | 3.480585000  | -1.896128000 | -1.327700000 |
| Se | 4.397889000  | 1.320774000  | 0.948767000  |
| C  | 5.757579000  | 2.537027000  | 0.344159000  |
| C  | 5.890309000  | 2.849772000  | -1.014924000 |
| C  | 6.849886000  | 3.768730000  | -1.429901000 |
| C  | 7.698483000  | 4.403878000  | -0.512213000 |
| C  | 7.554765000  | 4.080129000  | 0.843201000  |
| C  | 6.601323000  | 3.159701000  | 1.272171000  |
| H  | 5.242459000  | 2.376696000  | -1.746798000 |
| H  | 6.938144000  | 3.995825000  | -2.490179000 |
| H  | 8.201472000  | 4.550909000  | 1.580415000  |
| H  | 6.513519000  | 2.923491000  | 2.328462000  |
| C  | 0.641610000  | -4.496402000 | 1.338513000  |
| H  | -0.098531000 | -4.387562000 | 0.541345000  |
| H  | 0.967768000  | -5.544375000 | 1.343496000  |
| H  | 0.145533000  | -4.308092000 | 2.295363000  |
| C  | 8.711766000  | 5.421500000  | -0.967151000 |
| H  | 9.555825000  | 5.486087000  | -0.275013000 |
| H  | 9.101126000  | 5.184253000  | -1.961492000 |
| H  | 8.259540000  | 6.420154000  | -1.025186000 |

**PCox**

E = -7.21173 Ha

|    |              |              |              |
|----|--------------|--------------|--------------|
| Se | -2.836852000 | -0.892312000 | 0.667340000  |
| Se | -1.592575000 | -2.873335000 | -0.157422000 |
| O  | -2.554551000 | -4.216919000 | -0.050097000 |
| C  | -1.752364000 | -2.350448000 | -2.050599000 |
| C  | -2.656251000 | -3.028644000 | -2.860558000 |
| C  | -0.903237000 | -1.380550000 | -2.582665000 |
| C  | -2.719700000 | -2.715618000 | -4.217592000 |
| C  | -0.977008000 | -1.083240000 | -3.941248000 |
| C  | -1.887616000 | -1.740000000 | -4.781877000 |
| H  | -3.292130000 | -3.797756000 | -2.431687000 |
| H  | -0.189160000 | -0.854067000 | -1.954084000 |
| H  | -3.428759000 | -3.247237000 | -4.848437000 |
| H  | -0.311823000 | -0.327628000 | -4.353330000 |
| C  | -2.312112000 | -1.009725000 | 2.515889000  |
| C  | -2.970774000 | -1.883223000 | 3.390878000  |
| C  | -1.295812000 | -0.182997000 | 3.008127000  |
| C  | -2.604225000 | -1.927899000 | 4.732492000  |
| C  | -0.948832000 | -0.230709000 | 4.357087000  |
| C  | -1.590559000 | -1.104735000 | 5.243154000  |
| H  | -3.759586000 | -2.533419000 | 3.028024000  |
| H  | -0.779762000 | 0.500776000  | 2.340608000  |
| H  | -3.121236000 | -2.621015000 | 5.392393000  |
| H  | -0.160782000 | 0.424110000  | 4.722492000  |
| O  | -3.861565000 | -5.504802000 | 2.399386000  |
| H  | -3.428989000 | -5.125875000 | 1.616629000  |
| H  | -4.384622000 | -6.232656000 | 2.043939000  |
| C  | -1.981126000 | -1.388131000 | -6.244124000 |
| H  | -1.002226000 | -1.130278000 | -6.659115000 |

|   |              |              |              |
|---|--------------|--------------|--------------|
| H | -2.394683000 | -2.212893000 | -6.830640000 |
| H | -2.635577000 | -0.519669000 | -6.393277000 |
| C | -1.194792000 | -1.179377000 | 6.695038000  |
| H | -2.073849000 | -1.201873000 | 7.347367000  |
| H | -0.622859000 | -2.093977000 | 6.896172000  |
| H | -0.573800000 | -0.329233000 | 6.988832000  |

**(CH<sub>3</sub>OPhSe)<sub>2</sub>**

**1**

E = -6.92812 Ha

|    |              |              |              |
|----|--------------|--------------|--------------|
| Se | -1.490742030 | 0.247572350  | 0.552866090  |
| Se | -0.758485840 | -1.079806960 | -1.271693620 |
| C  | -3.391763500 | -0.076240990 | 0.640359600  |
| C  | -3.901869350 | -1.211130050 | 1.289014670  |
| C  | -4.287350640 | 0.855780910  | 0.111872070  |
| C  | -5.269718140 | -1.406862980 | 1.399710940  |
| C  | -5.667053510 | 0.672553140  | 0.222531930  |
| C  | -6.166450750 | -0.465422240 | 0.867795220  |
| H  | -3.221538230 | -1.945157350 | 1.710498290  |
| H  | -3.911167520 | 1.740367970  | -0.393663020 |
| H  | -5.668566510 | -2.283653480 | 1.902054530  |
| H  | -6.331034620 | 1.419318200  | -0.197061020 |
| C  | -1.034982300 | 0.043326270  | -2.817070910 |
| C  | -0.103033680 | 1.031291400  | -3.169593270 |
| C  | -2.140643340 | -0.164112730 | -3.644304900 |
| C  | -0.278093630 | 1.790891270  | -4.315814570 |
| C  | -2.323884090 | 0.589742850  | -4.805145280 |
| C  | -1.390342680 | 1.575887850  | -5.146508320 |
| H  | 0.765612580  | 1.204921180  | -2.541417900 |
| H  | -2.872903610 | -0.923850010 | -3.387012350 |
| H  | 0.441591670  | 2.556066780  | -4.592884590 |
| H  | -3.192154410 | 0.397149180  | -5.424477420 |
| O  | -7.488854100 | -0.755439460 | 1.036710150  |
| C  | -8.460682820 | 0.153644500  | 0.532010350  |
| H  | -8.374762620 | 1.140871930  | 1.003304080  |
| H  | -8.387034040 | 0.261290900  | -0.557602680 |
| H  | -9.429092160 | -0.281739320 | 0.784848730  |
| O  | -1.460340650 | 2.374765440  | -6.250267180 |
| C  | -2.552220250 | 2.209694620  | -7.148109880 |
| H  | -2.569600380 | 1.202443700  | -7.583172500 |
| H  | -3.513212870 | 2.412894710  | -6.658748360 |
| H  | -2.392381410 | 2.941051170  | -7.942385580 |

**RCox**

E = -7.58452 Ha

|    |              |              |              |
|----|--------------|--------------|--------------|
| Se | -1.485016000 | 0.226586000  | 0.575726000  |
| Se | -0.730420000 | -1.071100000 | -1.270778000 |
| O  | 0.057933000  | 4.259339000  | -0.625255000 |
| O  | -1.272691000 | 3.921280000  | -0.126051000 |
| H  | 0.441817000  | 4.657832000  | 0.172569000  |
| H  | -1.199546000 | 2.950263000  | -0.063542000 |
| C  | -3.390335000 | -0.073525000 | 0.636406000  |
| C  | -3.911125000 | -1.206249000 | 1.280527000  |
| C  | -4.274884000 | 0.862143000  | 0.095764000  |
| C  | -5.280619000 | -1.395384000 | 1.377415000  |
| C  | -5.655923000 | 0.684411000  | 0.192957000  |
| C  | -6.167445000 | -0.449969000 | 0.835420000  |
| H  | -3.238800000 | -1.943327000 | 1.709468000  |
| H  | -3.894115000 | 1.744862000  | -0.408893000 |
| H  | -5.688536000 | -2.269736000 | 1.876580000  |

|   |              |              |              |
|---|--------------|--------------|--------------|
| H | -6.311618000 | 1.434004000  | -0.234299000 |
| C | -1.029875000 | 0.045495000  | -2.812146000 |
| C | -0.105929000 | 1.036339000  | -3.178406000 |
| C | -2.145930000 | -0.170602000 | -3.623976000 |
| C | -0.298854000 | 1.790365000  | -4.324409000 |
| C | -2.346199000 | 0.578190000  | -4.784429000 |
| C | -1.420461000 | 1.567400000  | -5.140181000 |
| H | 0.766592000  | 1.221581000  | -2.559540000 |
| H | -2.871454000 | -0.932473000 | -3.354522000 |
| H | 0.409685000  | 2.563203000  | -4.607691000 |
| H | -3.221498000 | 0.380746000  | -5.392111000 |
| O | -7.491814000 | -0.732637000 | 0.991982000  |
| C | -8.455100000 | 0.182556000  | 0.479944000  |
| H | -8.366582000 | 1.168787000  | 0.952445000  |
| H | -8.372330000 | 0.289615000  | -0.608920000 |
| H | -9.427566000 | -0.247665000 | 0.725569000  |
| O | -1.507983000 | 2.362139000  | -6.244032000 |
| C | -2.621283000 | 2.205964000  | -7.117115000 |
| H | -2.653067000 | 1.201000000  | -7.556613000 |
| H | -3.569157000 | 2.411304000  | -6.603940000 |
| H | -2.476445000 | 2.940610000  | -7.911149000 |

**TSox**

E = -7.55205 Ha

nimag = -270.11

|    |              |              |              |
|----|--------------|--------------|--------------|
| O  | 6.774821000  | -2.019216000 | 1.562831000  |
| O  | 8.197444000  | -3.402317000 | 1.829734000  |
| H  | 7.642946000  | -1.583445000 | 1.553425000  |
| H  | 7.752340000  | -3.754071000 | 2.615104000  |
| Se | 5.568774000  | -0.776410000 | 0.485610000  |
| H  | 1.458810000  | -3.278130000 | -0.976185000 |
| H  | 4.392883000  | -2.197854000 | 2.873201000  |
| H  | 2.448764000  | -3.648086000 | 3.201477000  |
| C  | 4.033323000  | -1.895751000 | 0.770185000  |
| C  | 3.748199000  | -2.420087000 | 2.030000000  |
| C  | 2.643665000  | -3.250156000 | 2.212801000  |
| C  | 1.813208000  | -3.559268000 | 1.126717000  |
| C  | 2.104418000  | -3.026845000 | -0.140018000 |
| C  | 3.204903000  | -2.203051000 | -0.316595000 |
| H  | 3.421054000  | -1.805125000 | -1.303466000 |
| Se | 4.405303000  | 1.351466000  | 1.008266000  |
| C  | 5.746864000  | 2.563789000  | 0.375495000  |
| C  | 5.833904000  | 2.901569000  | -0.985879000 |
| C  | 6.775751000  | 3.816730000  | -1.426733000 |
| C  | 7.659191000  | 4.422262000  | -0.516610000 |
| C  | 7.579880000  | 4.091856000  | 0.842990000  |
| C  | 6.629951000  | 3.167815000  | 1.276540000  |
| H  | 5.155243000  | 2.446992000  | -1.701138000 |
| H  | 6.844936000  | 4.081822000  | -2.477778000 |
| H  | 8.245981000  | 4.539471000  | 1.571072000  |
| H  | 6.578645000  | 2.918202000  | 2.332134000  |
| O  | 8.541085000  | 5.305882000  | -1.057706000 |
| C  | 9.475187000  | 5.960090000  | -0.202727000 |
| H  | 8.968954000  | 6.573989000  | 0.552384000  |
| H  | 10.139757000 | 5.241603000  | 0.292523000  |
| H  | 10.065443000 | 6.605869000  | -0.854801000 |
| O  | 0.713334000  | -4.357723000 | 1.186116000  |
| C  | 0.358922000  | -4.953183000 | 2.431821000  |
| H  | 1.152236000  | -5.613741000 | 2.802386000  |
| H  | 0.127238000  | -4.194796000 | 3.189765000  |
| H  | -0.535844000 | -5.543812000 | 2.228827000\ |

**PCox**

E = -7.64957 Ha

|    |             |              |              |
|----|-------------|--------------|--------------|
| Se | 2.783951000 | 0.892943000  | 14.560830000 |
| Se | 5.070628000 | 1.764029000  | 15.010744000 |
| C  | 3.445388000 | -0.725229000 | 13.667151000 |
| C  | 3.387094000 | -0.801963000 | 12.281641000 |
| C  | 3.792325000 | -1.966081000 | 11.628067000 |
| C  | 4.251780000 | -3.059871000 | 12.374270000 |
| C  | 4.297209000 | -2.975077000 | 13.776956000 |
| C  | 3.895542000 | -1.814456000 | 14.420119000 |
| C  | 4.615369000 | 3.176333000  | 16.226711000 |
| C  | 4.267912000 | 4.442759000  | 15.745162000 |
| C  | 3.983730000 | 5.487028000  | 16.624140000 |
| C  | 4.050427000 | 5.274227000  | 18.007309000 |
| C  | 4.401115000 | 4.004175000  | 18.494839000 |
| C  | 4.676643000 | 2.969342000  | 17.614818000 |
| H  | 3.018664000 | 0.046623000  | 11.712196000 |
| H  | 3.742017000 | -2.004314000 | 10.546300000 |
| O  | 4.670777000 | -4.244576000 | 11.849528000 |
| H  | 4.651898000 | -3.831878000 | 14.342247000 |
| H  | 3.941337000 | -1.764945000 | 15.505266000 |
| H  | 4.207302000 | 4.624031000  | 14.677261000 |
| H  | 3.712761000 | 6.452546000  | 16.213684000 |
| O  | 3.799048000 | 6.217040000  | 18.958178000 |
| H  | 4.947469000 | 1.993177000  | 18.005931000 |
| O  | 2.091622000 | 1.765196000  | 13.333723000 |
| O  | 2.493510000 | 4.592012000  | 12.236716000 |
| H  | 2.366559000 | 3.689267000  | 12.572383000 |
| H  | 1.640643000 | 4.812912000  | 11.844871000 |
| C  | 3.433929000 | 7.530505000  | 18.543908000 |
| C  | 4.661821000 | -4.412913000 | 10.434533000 |
| H  | 4.228839000 | 8.003018000  | 17.953764000 |
| H  | 3.284501000 | 8.096680000  | 19.464860000 |
| H  | 2.501637000 | 7.526825000  | 17.965896000 |
| H  | 5.037870000 | -5.422005000 | 10.258035000 |
| H  | 5.320334000 | -3.689539000 | 9.938156000  |
| H  | 3.647827000 | -4.328053000 | 10.024588000 |
| H  | 4.451291000 | 3.850517000  | 19.568975000 |

**(CIPhSe)<sub>2</sub>****1**

E = -5.19614 Ha

|    |              |              |              |
|----|--------------|--------------|--------------|
| Se | -1.494166000 | 0.265835000  | 0.608015000  |
| Se | -0.692374000 | -1.002864000 | -1.222576000 |
| C  | -3.398987000 | -0.079534000 | 0.613540000  |
| C  | -3.904650000 | -1.240476000 | 1.208791000  |
| C  | -4.284157000 | 0.858036000  | 0.071156000  |
| C  | -5.277198000 | -1.469044000 | 1.256416000  |
| C  | -5.660011000 | 0.640522000  | 0.119310000  |
| C  | -6.148224000 | -0.524900000 | 0.709755000  |
| H  | -3.227809000 | -1.972938000 | 1.638207000  |
| H  | -3.906925000 | 1.763578000  | -0.394022000 |
| H  | -5.669266000 | -2.369633000 | 1.717920000  |
| H  | -6.346223000 | 1.368721000  | -0.300796000 |
| C  | -1.073779000 | 0.094946000  | -2.768384000 |
| C  | -0.276603000 | 1.199478000  | -3.088577000 |
| C  | -2.124754000 | -0.266692000 | -3.618590000 |
| C  | -0.528597000 | 1.939784000  | -4.240321000 |
| C  | -2.376111000 | 0.460892000  | -4.780283000 |
| C  | -1.576197000 | 1.562723000  | -5.082509000 |

|    |              |              |              |
|----|--------------|--------------|--------------|
| H  | 0.541662000  | 1.493505000  | -2.439085000 |
| H  | -2.752030000 | -1.119797000 | -3.378244000 |
| H  | 0.085127000  | 2.801120000  | -4.482958000 |
| H  | -3.188818000 | 0.178210000  | -5.441530000 |
| Cl | -7.866116000 | -0.806047000 | 0.767860000  |
| Cl | -1.888732000 | 2.479371000  | -6.530475000 |

**RCox**

E = -5.85186 Ha

|    |              |              |              |
|----|--------------|--------------|--------------|
| Se | -1.494166000 | 0.265835000  | 0.608015000  |
| Se | -0.692374000 | -1.002864000 | -1.222576000 |
| O  | 0.534732000  | 4.061054000  | -0.482386000 |
| O  | -0.853780000 | 4.001573000  | -0.031741000 |
| H  | 0.954448000  | 4.433438000  | 0.310029000  |
| H  | -0.966070000 | 3.038322000  | 0.063805000  |
| C  | -3.398987000 | -0.079534000 | 0.613540000  |
| C  | -3.904650000 | -1.240476000 | 1.208791000  |
| C  | -4.284157000 | 0.858036000  | 0.071156000  |
| C  | -5.277198000 | -1.469044000 | 1.256416000  |
| C  | -5.660011000 | 0.640522000  | 0.119310000  |
| C  | -6.148224000 | -0.524900000 | 0.709755000  |
| H  | -3.227809000 | -1.972938000 | 1.638207000  |
| H  | -3.906925000 | 1.763578000  | -0.394022000 |
| H  | -5.669266000 | -2.369633000 | 1.717920000  |
| H  | -6.346223000 | 1.368721000  | -0.300796000 |
| C  | -1.073779000 | 0.094946000  | -2.768384000 |
| C  | -0.276603000 | 1.199478000  | -3.088577000 |
| C  | -2.124754000 | -0.266692000 | -3.618590000 |
| C  | -0.528597000 | 1.939784000  | -4.240321000 |
| C  | -2.376111000 | 0.460892000  | -4.780283000 |
| C  | -1.576197000 | 1.562723000  | -5.082509000 |
| H  | 0.541662000  | 1.493505000  | -2.439085000 |
| H  | -2.752030000 | -1.119797000 | -3.378244000 |
| H  | 0.085127000  | 2.801120000  | -4.482958000 |
| H  | -3.188818000 | 0.178210000  | -5.441530000 |
| Cl | -7.866116000 | -0.806047000 | 0.767860000  |
| Cl | -1.888732000 | 2.479371000  | -6.530475000 |

**TSox**

E = -5.81726 Ha

nimag = -307.15 cm<sup>-1</sup>

|    |             |              |              |
|----|-------------|--------------|--------------|
| O  | 6.766439000 | -2.073356000 | 1.549761000  |
| O  | 8.160903000 | -3.521239000 | 1.642290000  |
| H  | 7.667340000 | -1.706103000 | 1.522154000  |
| H  | 7.767811000 | -3.904297000 | 2.441320000  |
| Se | 5.614867000 | -0.791105000 | 0.516319000  |
| H  | 1.535586000 | -3.287795000 | -1.037246000 |
| H  | 4.369118000 | -2.185434000 | 2.891863000  |
| H  | 2.384732000 | -3.639087000 | 3.166158000  |
| C  | 4.060079000 | -1.903556000 | 0.772770000  |
| C  | 3.745923000 | -2.413236000 | 2.034203000  |
| C  | 2.633806000 | -3.236185000 | 2.189967000  |
| C  | 1.842878000 | -3.543117000 | 1.081626000  |
| C  | 2.152737000 | -3.036986000 | -0.180966000 |
| C  | 3.266339000 | -2.214539000 | -0.333090000 |
| H  | 3.511207000 | -1.827013000 | -1.317213000 |
| Se | 4.409660000 | 1.327945000  | 0.999839000  |
| C  | 5.754032000 | 2.539142000  | 0.355529000  |
| C  | 5.884472000 | 2.804246000  | -1.014499000 |
| C  | 6.827674000 | 3.720295000  | -1.470986000 |
| C  | 7.645098000 | 4.380140000  | -0.551365000 |

|    |             |              |              |
|----|-------------|--------------|--------------|
| C  | 7.527436000 | 4.129638000  | 0.816420000  |
| C  | 6.584405000 | 3.208122000  | 1.264705000  |
| H  | 5.243462000 | 2.299350000  | -1.730516000 |
| H  | 6.925922000 | 3.924847000  | -2.532159000 |
| H  | 8.168110000 | 4.647333000  | 1.522930000  |
| H  | 6.495196000 | 3.011653000  | 2.328745000  |
| Cl | 8.822377000 | 5.528665000  | -1.118225000 |
| Cl | 0.455888000 | -4.574697000 | 1.275349000  |

**PCox**

E = -5.91569 Ha

|    |              |              |              |
|----|--------------|--------------|--------------|
| Se | -2.852002000 | -0.930168000 | 0.678142000  |
| Se | -1.569567000 | -2.882726000 | -0.163373000 |
| O  | -2.508052000 | -4.242210000 | -0.075258000 |
| C  | -1.741133000 | -2.341246000 | -2.052021000 |
| C  | -2.628037000 | -3.038372000 | -2.866108000 |
| C  | -0.919745000 | -1.341759000 | -2.573114000 |
| C  | -2.710435000 | -2.723135000 | -4.221030000 |
| C  | -0.995064000 | -1.026039000 | -3.927528000 |
| C  | -1.893631000 | -1.718616000 | -4.742329000 |
| H  | -3.243399000 | -3.827008000 | -2.442630000 |
| H  | -0.222619000 | -0.798762000 | -1.939963000 |
| H  | -3.400299000 | -3.255082000 | -4.868265000 |
| H  | -0.363598000 | -0.250381000 | -4.348162000 |
| C  | -2.308732000 | -1.032048000 | 2.521948000  |
| C  | -2.919543000 | -1.937876000 | 3.398635000  |
| C  | -1.328252000 | -0.156066000 | 3.005858000  |
| C  | -2.547865000 | -1.974211000 | 4.740412000  |
| C  | -0.962893000 | -0.178105000 | 4.349352000  |
| C  | -1.574307000 | -1.091583000 | 5.209240000  |
| H  | -3.678415000 | -2.626550000 | 3.043552000  |
| H  | -0.848964000 | 0.550478000  | 2.335089000  |
| H  | -3.014107000 | -2.685083000 | 5.414677000  |
| H  | -0.207250000 | 0.504163000  | 4.724973000  |
| O  | -3.997800000 | -5.356599000 | 2.373591000  |
| H  | -3.525259000 | -5.077229000 | 1.573131000  |
| H  | -4.554073000 | -6.085442000 | 2.075254000  |
| Cl | -1.989766000 | -1.325695000 | -6.435096000 |
| Cl | -1.113596000 | -1.129168000 | 6.888279000  |

**(NH<sub>2</sub>PhSe)<sub>2</sub>**

**1**

E = -6.17859 Ha

|    |              |              |              |
|----|--------------|--------------|--------------|
| Se | -1.507432000 | 0.256749000  | 0.573542000  |
| Se | -0.727918000 | -1.037871000 | -1.265222000 |
| C  | -3.398960000 | -0.102046000 | 0.651198000  |
| C  | -3.894480000 | -1.236096000 | 1.307938000  |
| C  | -4.314304000 | 0.805256000  | 0.102299000  |
| C  | -5.261149000 | -1.459848000 | 1.411137000  |
| C  | -5.683220000 | 0.589220000  | 0.207024000  |
| C  | -6.183317000 | -0.549515000 | 0.862889000  |
| H  | -3.203814000 | -1.951578000 | 1.744764000  |
| H  | -3.953177000 | 1.692017000  | -0.410470000 |
| H  | -5.621968000 | -2.349902000 | 1.922933000  |
| H  | -6.374799000 | 1.307908000  | -0.228386000 |
| C  | -1.029116000 | 0.076319000  | -2.807410000 |
| C  | -0.092715000 | 1.044105000  | -3.193977000 |
| C  | -2.166293000 | -0.109218000 | -3.604216000 |
| C  | -0.285691000 | 1.805114000  | -4.339405000 |
| C  | -2.362909000 | 0.646948000  | -4.753478000 |
| C  | -1.426003000 | 1.620576000  | -5.142733000 |

|   |              |              |              |
|---|--------------|--------------|--------------|
| H | 0.796959000  | 1.204958000  | -2.592015000 |
| H | -2.906542000 | -0.852679000 | -3.323290000 |
| H | 0.458795000  | 2.546536000  | -4.622795000 |
| H | -3.250548000 | 0.479548000  | -5.360423000 |
| N | -7.549722000 | -0.800257000 | 0.916252000  |
| H | -8.148856000 | 0.006609000  | 0.821507000  |
| H | -7.854250000 | -1.420351000 | 1.652288000  |
| N | -1.588571000 | 2.336282000  | -6.323093000 |
| H | -1.092419000 | 3.213576000  | -6.378232000 |
| H | -2.534057000 | 2.405842000  | -6.669588000 |

**RCox**

E = -6.83567 Ha

|    |              |              |              |
|----|--------------|--------------|--------------|
| Se | -1.481807000 | 0.223794000  | 0.593954000  |
| Se | -0.703537000 | -1.048615000 | -1.272171000 |
| O  | 0.147416000  | 4.197244000  | -0.526713000 |
| O  | -1.230872000 | 3.883297000  | -0.159098000 |
| H  | 0.465487000  | 4.572810000  | 0.310226000  |
| H  | -1.181329000 | 2.910967000  | -0.802260000 |
| C  | -3.381738000 | -0.085791000 | 0.650474000  |
| C  | -3.900453000 | -1.207831000 | 1.310241000  |
| C  | -4.276075000 | 0.832070000  | 0.084513000  |
| C  | -5.271005000 | -1.408828000 | 1.402502000  |
| C  | -5.648516000 | 0.637596000  | 0.178073000  |
| C  | -6.173242000 | -0.487705000 | 0.838584000  |
| H  | -3.225675000 | -1.931541000 | 1.758209000  |
| H  | -3.900740000 | 1.709508000  | -0.433350000 |
| H  | -5.650516000 | -2.289140000 | 1.917402000  |
| H  | -6.323873000 | 1.364125000  | -0.269226000 |
| C  | -1.019254000 | 0.070679000  | -2.802374000 |
| C  | -0.099697000 | 1.059600000  | -3.177407000 |
| C  | -2.154756000 | -0.127165000 | -3.599516000 |
| C  | -0.309050000 | 1.830766000  | -4.311495000 |
| C  | -2.365739000 | 0.638673000  | -4.739034000 |
| C  | -1.447930000 | 1.636244000  | -5.114691000 |
| H  | 0.784834000  | 1.234659000  | -2.572485000 |
| H  | -2.881482000 | -0.886387000 | -3.325714000 |
| H  | 0.416603000  | 2.595339000  | -4.580420000 |
| H  | -3.251484000 | 0.463956000  | -5.346517000 |
| N  | -7.542485000 | -0.714748000 | 0.881902000  |
| H  | -8.130033000 | 0.097870000  | 0.767684000  |
| H  | -7.866904000 | -1.327434000 | 1.615369000  |
| N  | -1.628606000 | 2.369936000  | -6.279506000 |
| H  | -1.148986000 | 3.257211000  | -6.320039000 |
| H  | -2.575648000 | 2.426349000  | -6.623968000 |

**TSox**

E = -6.80345 Ha

nimag = -259.86 cm<sup>-1</sup>

|    |             |              |              |
|----|-------------|--------------|--------------|
| O  | 6.790360000 | -2.030932000 | 1.512443000  |
| O  | 8.229982000 | -3.384982000 | 1.815030000  |
| H  | 7.643255000 | -1.567240000 | 1.514947000  |
| H  | 7.760014000 | -3.755742000 | 2.576597000  |
| Se | 5.557940000 | -0.804054000 | 0.431218000  |
| H  | 1.467607000 | -3.335631000 | -0.983052000 |
| H  | 4.397798000 | -2.187837000 | 2.852257000  |
| H  | 2.449455000 | -3.642089000 | 3.204775000  |
| C  | 4.034423000 | -1.924132000 | 0.741168000  |
| C  | 3.751522000 | -2.427848000 | 2.015087000  |
| C  | 2.651953000 | -3.250528000 | 2.210370000  |
| C  | 1.803417000 | -3.592310000 | 1.139915000  |

|    |             |              |              |
|----|-------------|--------------|--------------|
| C  | 2.099627000 | -3.078265000 | -0.136218000 |
| C  | 3.200467000 | -2.255585000 | -0.331632000 |
| H  | 3.409915000 | -1.875481000 | -1.327140000 |
| Se | 4.410755000 | 1.340587000  | 0.957585000  |
| C  | 5.764769000 | 2.545404000  | 0.350148000  |
| C  | 5.869451000 | 2.898378000  | -1.004148000 |
| C  | 6.829778000 | 3.803764000  | -1.431650000 |
| C  | 7.724920000 | 4.391337000  | -0.517075000 |
| C  | 7.616697000 | 4.036772000  | 0.840856000  |
| C  | 6.655879000 | 3.129093000  | 1.263661000  |
| H  | 5.190112000 | 2.461247000  | -1.729846000 |
| H  | 6.887414000 | 4.065824000  | -2.485948000 |
| H  | 8.292993000 | 4.479018000  | 1.569225000  |
| H  | 6.595900000 | 2.868628000  | 2.316207000  |
| N  | 8.647435000 | 5.336143000  | -0.933463000 |
| H  | 8.893795000 | 5.326149000  | -1.911666000 |
| H  | 9.439031000 | 5.491282000  | -0.327624000 |
| N  | 0.741783000 | -4.460429000 | 1.326734000  |
| H  | 0.007781000 | -4.435679000 | 0.635523000  |
| H  | 0.398054000 | -4.559794000 | 2.269703000  |

**PCox**

E = -6.90052 Ha

|    |              |              |              |
|----|--------------|--------------|--------------|
| Se | -2.832084000 | -0.883585000 | 0.687890000  |
| Se | -1.581828000 | -2.866505000 | -0.178154000 |
| O  | -2.541587000 | -4.213970000 | -0.055075000 |
| C  | -1.752790000 | -2.359844000 | -2.060842000 |
| C  | -2.653690000 | -3.046440000 | -2.872256000 |
| C  | -0.927543000 | -1.374044000 | -2.605991000 |
| C  | -2.739420000 | -2.740782000 | -4.224236000 |
| C  | -1.010801000 | -1.069562000 | -3.958262000 |
| C  | -1.921588000 | -1.746086000 | -4.792647000 |
| H  | -3.279760000 | -3.821600000 | -2.439633000 |
| H  | -0.219801000 | -0.831156000 | -1.984034000 |
| H  | -3.443612000 | -3.282534000 | -4.852312000 |
| H  | -0.362504000 | -0.302642000 | -4.376456000 |
| C  | -2.314674000 | -1.000949000 | 2.527226000  |
| C  | -2.992725000 | -1.853256000 | 3.411882000  |
| C  | -1.270046000 | -0.208122000 | 3.025224000  |
| C  | -2.634319000 | -1.912661000 | 4.750764000  |
| C  | -0.916315000 | -0.258482000 | 4.366821000  |
| C  | -1.590458000 | -1.115945000 | 5.256099000  |
| H  | -3.796079000 | -2.487167000 | 3.051419000  |
| H  | -0.730547000 | 0.456978000  | 2.357181000  |
| H  | -3.169306000 | -2.588386000 | 5.414407000  |
| H  | -0.108680000 | 0.372354000  | 4.732490000  |
| O  | -3.814109000 | -5.504445000 | 2.387392000  |
| H  | -3.383532000 | -5.101651000 | 1.614370000  |
| H  | -4.358919000 | -6.202997000 | 2.006751000  |
| N  | -1.965645000 | -1.482656000 | -6.153574000 |
| H  | -1.616263000 | -0.582594000 | -6.446687000 |
| H  | -2.813679000 | -1.747649000 | -6.631965000 |
| N  | -1.273467000 | -1.133562000 | 6.606384000  |
| H  | -0.349092000 | -0.811820000 | 6.851945000  |
| H  | -1.547248000 | -1.960808000 | 7.115566000  |

**(CNPhSe)<sub>2</sub>**

**1**

E = -6.22880 Ha

|    |              |             |             |
|----|--------------|-------------|-------------|
| Se | -1.608790000 | 0.321484000 | 0.447391000 |
|----|--------------|-------------|-------------|

|    |              |              |              |
|----|--------------|--------------|--------------|
| Se | -0.886781000 | -1.024527000 | -1.297106000 |
| C  | -3.502220000 | -0.056621000 | 0.652304000  |
| C  | -4.255289000 | -0.846753000 | -0.216439000 |
| C  | -4.111210000 | 0.535213000  | 1.766831000  |
| C  | -5.609579000 | -1.046642000 | 0.024234000  |
| C  | -5.464573000 | 0.339467000  | 2.007762000  |
| C  | -6.229651000 | -0.455705000 | 1.137381000  |
| H  | -3.790274000 | -1.313876000 | -1.078209000 |
| H  | -3.536192000 | 1.149221000  | 2.455718000  |
| H  | -6.194225000 | -1.662640000 | -0.652383000 |
| H  | -5.933812000 | 0.798169000  | 2.872685000  |
| C  | -1.077884000 | 0.052352000  | -2.901130000 |
| C  | -1.758628000 | 1.268370000  | -2.966725000 |
| C  | -0.482516000 | -0.480373000 | -4.052195000 |
| C  | -1.844581000 | 1.951593000  | -4.174109000 |
| C  | -0.571061000 | 0.197941000  | -5.260569000 |
| C  | -1.253622000 | 1.424227000  | -5.334105000 |
| H  | -2.216547000 | 1.691562000  | -2.078968000 |
| H  | 0.057492000  | -1.423307000 | -4.014697000 |
| H  | -2.373388000 | 2.898679000  | -4.223516000 |
| H  | -0.107429000 | -0.215986000 | -6.150730000 |
| C  | -1.342243000 | 2.126908000  | -6.573896000 |
| N  | -1.414812000 | 2.699701000  | -7.584788000 |
| C  | -7.620922000 | -0.661391000 | 1.383670000  |
| N  | -8.755311000 | -0.829140000 | 1.584458000  |

**RCox**

E = -6.88321 Ha

|    |              |              |              |
|----|--------------|--------------|--------------|
| Se | -1.488882000 | 0.253343000  | 0.593329000  |
| Se | -0.722363000 | -1.028601000 | -1.230728000 |
| O  | 0.492676000  | 4.153557000  | -0.517977000 |
| O  | -0.851753000 | 4.117765000  | 0.053209000  |
| H  | 0.973408000  | 4.585082000  | 0.207000000  |
| H  | -0.952020000 | 3.160561000  | 0.196710000  |
| C  | -3.399872000 | -0.080767000 | 0.599047000  |
| C  | -3.903933000 | -1.304541000 | 1.054697000  |
| C  | -4.279464000 | 0.932611000  | 0.202446000  |
| C  | -5.275301000 | -1.518715000 | 1.107417000  |
| C  | -5.654326000 | 0.727689000  | 0.261554000  |
| C  | -6.161770000 | -0.501483000 | 0.711956000  |
| H  | -3.225483000 | -2.090770000 | 1.370768000  |
| H  | -3.896292000 | 1.882685000  | -0.156691000 |
| H  | -5.667958000 | -2.467084000 | 1.461318000  |
| H  | -6.337654000 | 1.513528000  | -0.045376000 |
| C  | -1.094934000 | 0.079402000  | -2.776299000 |
| C  | -0.425600000 | 1.290154000  | -2.987664000 |
| C  | -2.002261000 | -0.394182000 | -3.731362000 |
| C  | -0.668573000 | 2.028582000  | -4.138678000 |
| C  | -2.235285000 | 0.331700000  | -4.894864000 |
| C  | -1.572583000 | 1.551736000  | -5.104408000 |
| H  | 0.284609000  | 1.662830000  | -2.257463000 |
| H  | -2.529877000 | -1.328936000 | -3.567765000 |
| H  | -0.155165000 | 2.971677000  | -4.298466000 |
| H  | -2.936292000 | -0.036236000 | -5.637808000 |
| C  | -1.815789000 | 2.304601000  | -6.294508000 |
| N  | -2.013815000 | 2.916220000  | -7.264663000 |
| C  | -7.573141000 | -0.718686000 | 0.770268000  |
| N  | -8.722072000 | -0.897607000 | 0.818248000  |

**TSox**



E = -6.84709 Ha

|    |              |              |              |
|----|--------------|--------------|--------------|
| O  | 6.758008000  | -2.130639000 | 1.570007000  |
| O  | 8.110226000  | -3.625282000 | 1.523944000  |
| H  | 7.681768000  | -1.820758000 | 1.532053000  |
| H  | 7.758379000  | -4.035118000 | 2.329520000  |
| Se | 5.660668000  | -0.806577000 | 0.568967000  |
| H  | 1.544073000  | -3.184532000 | -1.069288000 |
| H  | 4.373560000  | -2.225521000 | 2.903645000  |
| H  | 2.355933000  | -3.638384000 | 3.137934000  |
| C  | 4.079004000  | -1.898004000 | 0.788841000  |
| C  | 3.749806000  | -2.424843000 | 2.039667000  |
| C  | 2.619911000  | -3.223782000 | 2.170136000  |
| C  | 1.816598000  | -3.498398000 | 1.050954000  |
| C  | 2.159537000  | -2.965988000 | -0.202460000 |
| C  | 3.289704000  | -2.166828000 | -0.331653000 |
| H  | 3.553061000  | -1.763690000 | -1.304296000 |
| Se | 4.432189000  | 1.311202000  | 1.030754000  |
| C  | 5.753912000  | 2.531704000  | 0.356318000  |
| C  | 5.971528000  | 2.672036000  | -1.022104000 |
| C  | 6.893974000  | 3.596139000  | -1.495449000 |
| C  | 7.608757000  | 4.403480000  | -0.593448000 |
| C  | 7.387965000  | 4.266533000  | 0.787240000  |
| C  | 6.470969000  | 3.333435000  | 1.256061000  |
| H  | 5.412664000  | 2.064448000  | -1.726581000 |
| H  | 7.060805000  | 3.704041000  | -2.562732000 |
| H  | 7.939900000  | 4.888265000  | 1.485363000  |
| H  | 6.310758000  | 3.227320000  | 2.324351000  |
| C  | 0.654000000  | -4.319101000 | 1.186870000  |
| N  | -0.293925000 | -4.984625000 | 1.297748000  |
| C  | 8.553061000  | 5.359382000  | -1.078879000 |
| N  | 9.321862000  | 6.138534000  | -1.474312000 |

#### PCox

E = -6.94630 Ha

|    |              |              |              |
|----|--------------|--------------|--------------|
| Se | -2.831507000 | -0.953265000 | 0.666072000  |
| Se | -1.558350000 | -2.915861000 | -0.161615000 |
| O  | -2.503189000 | -4.268398000 | -0.088759000 |
| C  | -1.735124000 | -2.348110000 | -2.049728000 |
| C  | -2.633479000 | -3.034560000 | -2.860905000 |
| C  | -0.908492000 | -1.347396000 | -2.561396000 |
| C  | -2.723866000 | -2.702796000 | -4.208787000 |
| C  | -0.992791000 | -1.017757000 | -3.909277000 |
| C  | -1.904622000 | -1.692436000 | -4.740086000 |
| H  | -3.248207000 | -3.823739000 | -2.437773000 |
| H  | -0.204337000 | -0.818478000 | -1.924612000 |
| H  | -3.423724000 | -3.223780000 | -4.854998000 |
| H  | -0.358123000 | -0.241025000 | -4.324374000 |
| C  | -2.296044000 | -1.047851000 | 2.515243000  |
| C  | -2.871751000 | -1.988574000 | 3.379543000  |
| C  | -1.364725000 | -0.122281000 | 3.006233000  |
| C  | -2.509104000 | -2.009769000 | 4.721585000  |
| C  | -1.012881000 | -0.130882000 | 4.350485000  |
| C  | -1.581059000 | -1.079126000 | 5.218017000  |
| H  | -3.595538000 | -2.708775000 | 3.014728000  |
| H  | -0.917597000 | 0.607659000  | 2.338698000  |
| H  | -2.947619000 | -2.745720000 | 5.388352000  |
| H  | -0.296029000 | 0.589153000  | 4.733016000  |
| O  | -4.074211000 | -5.275831000 | 2.379946000  |
| H  | -3.600797000 | -5.082786000 | 1.556055000  |
| H  | -4.666246000 | -6.001528000 | 2.150625000  |
| C  | -1.214671000 | -1.093772000 | 6.599362000  |

|   |              |              |              |
|---|--------------|--------------|--------------|
| N | -0.914063000 | -1.102467000 | 7.723638000  |
| C | -1.993380000 | -1.352401000 | -6.125814000 |
| N | -2.065253000 | -1.074692000 | -7.253495000 |

#### (NO<sub>2</sub>PhSe)<sub>2</sub>

1

E = -6.41724 Ha

|    |              |              |              |
|----|--------------|--------------|--------------|
| Se | -0.773905000 | -0.823805000 | -2.104415000 |
| Se | 0.775463000  | 0.854157000  | -2.139254000 |
| C  | -0.124262000 | -2.079308000 | -0.809648000 |
| C  | -0.845526000 | -3.276315000 | -0.729218000 |
| C  | -0.468034000 | -4.253594000 | 0.178844000  |
| C  | 0.631807000  | -4.028440000 | 1.000637000  |
| C  | 1.356213000  | -2.843864000 | 0.927080000  |
| C  | 0.975096000  | -1.865947000 | 0.019224000  |
| C  | 0.163396000  | 2.130261000  | -0.846506000 |
| C  | -0.918602000 | 1.935205000  | 0.009301000  |
| C  | -1.273731000 | 2.927991000  | 0.911518000  |
| C  | -0.540978000 | 4.109008000  | 0.952378000  |
| C  | 0.542014000  | 4.315786000  | 0.103799000  |
| C  | 0.893584000  | 3.323646000  | -0.798522000 |
| H  | -1.703551000 | -3.455548000 | -1.375764000 |
| H  | -1.014142000 | -5.189076000 | 0.254923000  |
| N  | 1.036557000  | -5.065560000 | 1.965958000  |
| H  | 2.210223000  | -2.696557000 | 1.581753000  |
| H  | 1.539469000  | -0.938815000 | -0.046077000 |
| H  | -1.489608000 | 1.010689000  | -0.030426000 |
| H  | -2.113912000 | 2.795239000  | 1.586847000  |
| N  | -0.918566000 | 5.162137000  | 1.911187000  |
| H  | 1.095366000  | 5.248703000  | 0.155125000  |
| H  | 1.738524000  | 3.488336000  | -1.465848000 |
| O  | 0.373293000  | -6.092747000 | 1.999581000  |
| O  | 2.008639000  | -4.830862000 | 2.669990000  |
| O  | -0.248278000 | 6.185321000  | 1.916035000  |
| O  | -1.877013000 | 4.943815000  | 2.638784000  |

#### RCox

E = -7.07285 Ha

|    |              |              |              |
|----|--------------|--------------|--------------|
| O  | 9.890848000  | -3.645362000 | 0.526185000  |
| O  | 10.975130000 | -2.943683000 | -0.156332000 |
| H  | 10.374807000 | -4.016737000 | 1.282161000  |
| H  | 11.108568000 | -3.530180000 | -0.919349000 |
| Se | 5.881636000  | -0.615852000 | 1.841933000  |
| H  | 6.873309000  | 3.150447000  | -1.487984000 |
| H  | 8.355969000  | -1.179101000 | 0.437337000  |
| H  | 9.697180000  | -0.077889000 | -1.311360000 |
| C  | 6.833017000  | 0.371363000  | 0.470206000  |
| C  | 8.016409000  | -0.233539000 | 0.024616000  |
| C  | 8.779429000  | 0.379002000  | -0.961853000 |
| C  | 8.354418000  | 1.594976000  | -1.495048000 |
| C  | 7.180690000  | 2.204878000  | -1.056814000 |
| C  | 6.417007000  | 1.588795000  | -0.071256000 |
| H  | 5.504748000  | 2.063793000  | 0.273338000  |
| Se | 4.156720000  | 0.772116000  | 2.537791000  |
| C  | 2.636037000  | 0.319201000  | 1.424082000  |
| C  | 1.427405000  | 0.928554000  | 1.790389000  |
| C  | 0.272278000  | 0.682001000  | 1.059486000  |
| C  | 0.331373000  | -0.178489000 | -0.035910000 |
| C  | 1.526242000  | -0.790613000 | -0.408282000 |

|   |              |              |              |
|---|--------------|--------------|--------------|
| C | 2.681505000  | -0.538670000 | 0.323755000  |
| H | 1.376895000  | 1.595063000  | 2.647818000  |
| H | -0.669038000 | 1.144697000  | 1.331478000  |
| H | 1.544892000  | -1.454922000 | -1.264391000 |
| H | 3.611657000  | -1.017492000 | 0.037060000  |
| N | 9.165417000  | 2.251346000  | -2.546330000 |
| N | -0.898886000 | -0.447330000 | -0.815592000 |
| O | -1.933433000 | 0.116844000  | -0.459371000 |
| O | -0.811007000 | -1.218049000 | -1.771221000 |
| O | 8.767151000  | 3.331417000  | -2.982929000 |
| O | 10.188032000 | 1.676513000  | -2.919707000 |

**TSox**

E = -7.03425 Ha

|    |              |              |              |
|----|--------------|--------------|--------------|
| O  | 6.764250000  | -2.202027000 | 1.578075000  |
| O  | 8.088647000  | -3.719352000 | 1.469323000  |
| H  | 7.696604000  | -1.916616000 | 1.544652000  |
| H  | 7.743463000  | -4.146611000 | 2.268885000  |
| Se | 5.697239000  | -0.831132000 | 0.617056000  |
| H  | 1.513407000  | -3.051753000 | -1.100492000 |
| H  | 4.391929000  | -2.336852000 | 2.889392000  |
| H  | 2.329630000  | -3.721616000 | 3.057907000  |
| C  | 4.093918000  | -1.901436000 | 0.793882000  |
| C  | 3.760514000  | -2.480829000 | 2.020172000  |
| C  | 2.612434000  | -3.261133000 | 2.118727000  |
| C  | 1.820459000  | -3.447684000 | 0.989042000  |
| C  | 2.146847000  | -2.878746000 | -0.238735000 |
| C  | 3.294903000  | -2.098344000 | -0.335005000 |
| H  | 3.562533000  | -1.654706000 | -1.288531000 |
| Se | 4.500828000  | 1.290811000  | 1.133551000  |
| C  | 5.778150000  | 2.521760000  | 0.398203000  |
| C  | 6.039398000  | 2.566456000  | -0.979614000 |
| C  | 6.925066000  | 3.505586000  | -1.494677000 |
| C  | 7.536906000  | 4.408008000  | -0.626328000 |
| C  | 7.287109000  | 4.385933000  | 0.743663000  |
| C  | 6.411279000  | 3.434246000  | 1.255398000  |
| H  | 5.543108000  | 1.875351000  | -1.652959000 |
| H  | 7.136331000  | 3.553241000  | -2.556447000 |
| H  | 7.780657000  | 5.099418000  | 1.392976000  |
| H  | 6.220220000  | 3.400111000  | 2.323278000  |
| N  | 0.588605000  | -4.282300000 | 1.096153000  |
| O  | 0.329254000  | -4.767362000 | 2.194289000  |
| O  | -0.084900000 | -4.427174000 | 0.079155000  |
| N  | 8.477613000  | 5.420676000  | -1.176925000 |
| O  | 8.673374000  | 5.410540000  | -2.390613000 |
| O  | 8.997377000  | 6.201799000  | -0.382628000 |

**PCox**

E = -7.13327 Ha

|    |              |              |              |
|----|--------------|--------------|--------------|
| Se | -2.818142000 | -0.966222000 | 0.690374000  |
| Se | -1.577118000 | -2.924616000 | -0.189674000 |
| O  | -2.527625000 | -4.272459000 | -0.121349000 |
| C  | -1.789516000 | -2.320619000 | -2.064221000 |
| C  | -2.716767000 | -2.979862000 | -2.865612000 |
| C  | -0.957802000 | -1.324193000 | -2.576740000 |
| C  | -2.832514000 | -2.623316000 | -4.206957000 |
| C  | -1.066746000 | -0.969114000 | -3.917904000 |
| C  | -2.006242000 | -1.622955000 | -4.713080000 |
| H  | -3.334339000 | -3.766887000 | -2.443134000 |
| H  | -0.230973000 | -0.817831000 | -1.947367000 |
| H  | -3.548665000 | -3.111416000 | -4.857569000 |

|   |              |              |              |
|---|--------------|--------------|--------------|
| H | -0.438173000 | -0.198857000 | -4.348678000 |
| C | -2.251527000 | -1.096707000 | 2.529030000  |
| C | -2.806697000 | -2.059157000 | 3.382973000  |
| C | -1.319159000 | -0.172703000 | 3.021773000  |
| C | -2.421888000 | -2.104014000 | 4.719945000  |
| C | -0.943498000 | -0.205262000 | 4.360536000  |
| C | -1.498667000 | -1.174680000 | 5.192716000  |
| H | -3.532140000 | -2.776755000 | 3.016959000  |
| H | -0.888449000 | 0.573339000  | 2.361556000  |
| H | -2.835631000 | -2.847804000 | 5.390556000  |
| H | -0.227198000 | 0.502856000  | 4.759888000  |
| O | -4.046243000 | -5.313589000 | 2.373472000  |
| H | -3.596028000 | -5.123577000 | 1.536305000  |
| H | -4.628007000 | -6.055058000 | 2.169821000  |
| N | -2.125883000 | -1.242028000 | -6.150077000 |
| N | -1.092709000 | -1.215468000 | 6.625422000  |
| O | -1.617210000 | -2.066711000 | 7.339324000  |
| O | -0.258388000 | -0.393746000 | 7.000884000  |
| O | -2.958826000 | -1.840552000 | -6.825843000 |
| O | -1.383806000 | -0.353929000 | -6.562910000 |

**(CH<sub>3</sub>PhTe)<sub>2</sub>**

**1**

E = -6.43895 Ha

|    |              |              |              |
|----|--------------|--------------|--------------|
| Te | -2.521413000 | 5.175214000  | 2.865531000  |
| Te | -3.906930000 | 2.852015000  | 2.436188000  |
| C  | -0.764786000 | 4.844796000  | 1.684405000  |
| C  | -0.763852000 | 5.036069000  | 0.297543000  |
| C  | 0.401688000  | 4.830469000  | -0.438846000 |
| C  | 1.598191000  | 4.438069000  | 0.179733000  |
| C  | 2.861666000  | 4.242987000  | -0.622642000 |
| C  | 1.583833000  | 4.256428000  | 1.567818000  |
| C  | 0.421348000  | 4.453137000  | 2.314574000  |
| C  | -2.770098000 | 1.459381000  | 3.601613000  |
| C  | -1.869197000 | 0.603161000  | 2.959540000  |
| C  | -1.137334000 | -0.329766000 | 3.695913000  |
| C  | -1.276572000 | -0.433346000 | 5.084918000  |
| C  | -0.496950000 | -1.454448000 | 5.877286000  |
| C  | -2.183310000 | 0.431980000  | 5.715655000  |
| C  | -2.924205000 | 1.363051000  | 4.989905000  |
| H  | -1.672635000 | 5.338686000  | -0.214354000 |
| H  | 0.377710000  | 4.978847000  | -1.517257000 |
| H  | 3.584021000  | 3.618185000  | -0.090572000 |
| H  | 3.348688000  | 5.204735000  | -0.826595000 |
| H  | 2.655935000  | 3.774728000  | -1.589990000 |
| H  | 2.493014000  | 3.946320000  | 2.079837000  |
| H  | 0.443459000  | 4.289283000  | 3.387662000  |
| H  | -1.725265000 | 0.664885000  | 1.885136000  |
| H  | -0.438673000 | -0.981690000 | 3.174616000  |
| H  | 0.364418000  | -1.827026000 | 5.316693000  |
| H  | -1.124237000 | -2.318950000 | 6.127642000  |
| H  | -0.132255000 | -1.037736000 | 6.821302000  |
| H  | -2.314959000 | 0.378669000  | 6.795225000  |
| H  | -3.616865000 | 2.017509000  | 5.510870000  |

**RCox**

E = -7.09514 Ha

|    |              |              |              |
|----|--------------|--------------|--------------|
| Te | -1.441226000 | 0.258485000  | 0.777337000  |
| Te | -0.628667000 | -1.245427000 | -1.369787000 |
| O  | -0.064831000 | 4.500335000  | -0.764896000 |

|   |              |              |              |
|---|--------------|--------------|--------------|
| O | -1.420031000 | 4.093977000  | -0.400535000 |
| H | 0.178275000  | 5.007337000  | 0.026622000  |
| H | -1.282080000 | 3.143334000  | -0.229993000 |
| C | -3.557746000 | -0.077726000 | 0.810274000  |
| C | -4.088635000 | -1.151086000 | 1.533725000  |
| C | -4.430149000 | 0.794772000  | 0.151657000  |
| C | -5.467237000 | -1.345573000 | 1.591157000  |
| C | -5.807845000 | 0.590275000  | 0.217101000  |
| C | -6.353454000 | -0.479740000 | 0.937067000  |
| H | -3.430192000 | -1.842670000 | 2.051312000  |
| H | -4.044103000 | 1.633528000  | -0.419775000 |
| H | -5.857709000 | -2.189355000 | 2.156602000  |
| H | -6.467738000 | 1.279516000  | -0.305805000 |
| C | -0.935288000 | 0.097260000  | -3.007981000 |
| C | 0.019623000  | 1.069242000  | -3.327658000 |
| C | -2.075235000 | -0.024343000 | -3.808583000 |
| C | -0.173625000 | 1.908064000  | -4.421624000 |
| C | -2.254324000 | 0.817698000  | -4.906356000 |
| C | -1.312809000 | 1.800841000  | -5.231328000 |
| H | 0.914505000  | 1.179622000  | -2.722634000 |
| H | -2.828703000 | -0.772612000 | -3.580504000 |
| H | 0.577953000  | 2.661993000  | -4.646263000 |
| H | -3.147978000 | 0.705441000  | -5.516777000 |
| C | -7.844548000 | -0.677546000 | 1.030670000  |
| H | -8.361497000 | -0.257506000 | 0.163353000  |
| H | -8.105527000 | -1.737366000 | 1.104541000  |
| H | -8.247606000 | -0.181000000 | 1.922897000  |
| C | -1.522201000 | 2.733438000  | -6.396248000 |
| H | -0.601057000 | 2.866163000  | -6.972913000 |
| H | -2.298069000 | 2.366088000  | -7.072988000 |
| H | -1.829403000 | 3.727491000  | -6.047563000 |

#### TSox

E = -7.07130 Ha  
 nimag = -147.26 cm<sup>-1</sup>

|    |             |              |              |
|----|-------------|--------------|--------------|
| O  | 6.900247000 | -2.464363000 | 1.599524000  |
| O  | 7.976498000 | -4.018508000 | 1.740734000  |
| H  | 7.710068000 | -2.001931000 | 1.863702000  |
| H  | 7.306093000 | -4.483184000 | 2.264168000  |
| Te | 5.734444000 | -0.895986000 | 0.495566000  |
| H  | 1.349065000 | -3.241127000 | -1.060171000 |
| H  | 4.396675000 | -2.615157000 | 2.797106000  |
| H  | 2.398210000 | -4.023078000 | 3.033540000  |
| C  | 4.003570000 | -2.116530000 | 0.732197000  |
| C  | 3.730217000 | -2.742558000 | 1.950904000  |
| C  | 2.598114000 | -3.544875000 | 2.076977000  |
| C  | 1.718632000 | -3.744695000 | 1.004896000  |
| C  | 2.010479000 | -3.107012000 | -0.207090000 |
| C  | 3.138723000 | -2.301286000 | -0.349306000 |
| H  | 3.335379000 | -1.823027000 | -1.304288000 |
| Te | 4.325753000 | 1.503898000  | 1.101878000  |
| C  | 5.790152000 | 2.822007000  | 0.284404000  |
| C  | 5.837128000 | 3.080267000  | -1.091367000 |
| C  | 6.772523000 | 3.974665000  | -1.605992000 |
| C  | 7.681984000 | 4.640880000  | -0.773099000 |
| C  | 7.623913000 | 4.373803000  | 0.599898000  |
| C  | 6.694549000 | 3.477875000  | 1.127300000  |
| H  | 5.144672000 | 2.584738000  | -1.765150000 |
| H  | 6.792216000 | 4.156551000  | -2.678623000 |
| H  | 8.318314000 | 4.869836000  | 1.274704000  |
| H  | 6.679533000 | 3.291307000  | 2.196967000  |
| C  | 0.516019000 | -4.641649000 | 1.143994000  |

|   |              |              |              |
|---|--------------|--------------|--------------|
| H | -0.275372000 | -4.366292000 | 0.441482000  |
| H | 0.785920000  | -5.685835000 | 0.940030000  |
| H | 0.103349000  | -4.605935000 | 2.156431000  |
| C | 8.669238000  | 5.629799000  | -1.336702000 |
| H | 9.519878000  | 5.776548000  | -0.665853000 |
| H | 9.052258000  | 5.304559000  | -2.308766000 |
| H | 8.196491000  | 6.609009000  | -1.486612000 |

#### PCox

E = -7.16341 Ha

|    |              |              |              |
|----|--------------|--------------|--------------|
| Te | -2.916048000 | -0.716433000 | 0.735466000  |
| Te | -1.444169000 | -2.961972000 | -0.212681000 |
| O  | -2.555357000 | -4.418047000 | -0.128129000 |
| C  | -1.691033000 | -2.418733000 | -2.287315000 |
| C  | -2.605948000 | -3.139924000 | -3.049052000 |
| C  | -0.909646000 | -1.423534000 | -2.879146000 |
| C  | -2.746239000 | -2.851492000 | -4.407170000 |
| C  | -1.059229000 | -1.149249000 | -4.236007000 |
| C  | -1.980708000 | -1.855230000 | -5.024275000 |
| H  | -3.198828000 | -3.923470000 | -2.584358000 |
| H  | -0.187369000 | -0.854973000 | -2.297750000 |
| H  | -3.465382000 | -3.417879000 | -4.994920000 |
| H  | -0.446801000 | -0.372121000 | -4.688749000 |
| C  | -2.333003000 | -0.944031000 | 2.776515000  |
| C  | -2.910642000 | -1.936148000 | 3.578096000  |
| C  | -1.394332000 | -0.070593000 | 3.337626000  |
| C  | -2.542549000 | -2.047606000 | 4.917358000  |
| C  | -1.047159000 | -0.187139000 | 4.682901000  |
| C  | -1.612478000 | -1.175517000 | 5.498099000  |
| H  | -3.633293000 | -2.633904000 | 3.168334000  |
| H  | -0.928947000 | 0.700266000  | 2.730470000  |
| H  | -2.993152000 | -2.835411000 | 5.517144000  |
| H  | -0.316146000 | 0.502569000  | 5.099802000  |
| O  | -4.018618000 | -5.346864000 | 2.294844000  |
| H  | -3.542828000 | -5.087196000 | 1.484882000  |
| H  | -4.731090000 | -5.911147000 | 1.973392000  |
| C  | -2.136956000 | -1.540276000 | -6.489715000 |
| H  | -1.174992000 | -1.592431000 | -7.011694000 |
| H  | -2.824766000 | -2.233865000 | -6.979305000 |
| H  | -2.525611000 | -0.525106000 | -6.634305000 |
| C  | -1.253248000 | -1.284584000 | 6.957551000  |
| H  | -1.987879000 | -0.756573000 | 7.579269000  |
| H  | -1.239561000 | -2.326925000 | 7.289731000  |
| H  | -0.273628000 | -0.845624000 | 7.165856000  |

#### (CH<sub>3</sub>OPhTe)<sub>2</sub>

##### 1

E = -6.87601 Ha

|    |              |              |              |
|----|--------------|--------------|--------------|
| Te | -1.497855000 | 0.363388000  | 0.709787000  |
| Te | -0.664214000 | -1.220769000 | -1.371725000 |
| C  | -3.592290000 | -0.052510000 | 0.809307000  |
| C  | -4.074406000 | -1.159106000 | 1.525016000  |
| C  | -4.514557000 | 0.809108000  | 0.211307000  |
| C  | -5.437005000 | -1.396210000 | 1.633115000  |
| C  | -5.889107000 | 0.583768000  | 0.316190000  |
| C  | -6.358446000 | -0.525355000 | 1.030157000  |
| H  | -3.380750000 | -1.844304000 | 2.003289000  |
| H  | -4.169763000 | 1.673426000  | -0.348986000 |
| H  | -5.811009000 | -2.252920000 | 2.186839000  |
| H  | -6.572090000 | 1.277187000  | -0.160802000 |

|   |              |              |              |
|---|--------------|--------------|--------------|
| C | -0.941444000 | 0.050445000  | -3.067520000 |
| C | 0.066556000  | 0.939580000  | -3.470567000 |
| C | -2.108658000 | -0.026203000 | -3.830670000 |
| C | -0.093044000 | 1.729676000  | -4.599723000 |
| C | -2.280922000 | 0.762606000  | -4.970371000 |
| C | -1.269585000 | 1.648553000  | -5.361211000 |
| H | 0.985918000  | 1.018323000  | -2.897868000 |
| H | -2.904981000 | -0.706473000 | -3.542699000 |
| H | 0.686875000  | 2.418443000  | -4.912322000 |
| H | -3.201200000 | 0.673029000  | -5.535961000 |
| O | -7.672573000 | -0.850046000 | 1.202703000  |
| C | -8.667658000 | -0.009482000 | 0.629507000  |
| H | -8.620815000 | 1.008692000  | 1.036124000  |
| H | -8.583981000 | 0.029712000  | -0.464003000 |
| H | -9.624182000 | -0.460263000 | 0.900064000  |
| O | -1.320924000 | 2.467643000  | -6.451378000 |
| C | -2.480034000 | 2.438965000  | -7.276469000 |
| H | -2.636451000 | 1.447802000  | -7.720696000 |
| H | -3.379138000 | 2.736774000  | -6.722184000 |
| H | -2.292547000 | 3.162934000  | -8.071484000 |

**RCox**

E = -7.53330 Ha

|    |              |              |              |
|----|--------------|--------------|--------------|
| Te | -1.396636000 | 0.184586000  | 0.803424000  |
| Te | -0.655290000 | -1.301104000 | -1.393019000 |
| O  | -2.153217000 | 4.019978000  | -1.487840000 |
| O  | -1.079294000 | 3.935442000  | -0.503545000 |
| H  | -1.655083000 | 3.854623000  | -2.305176000 |
| H  | -1.189633000 | 3.015828000  | -0.193756000 |
| C  | -3.519838000 | -0.041504000 | 0.844891000  |
| C  | -4.104667000 | -1.139969000 | 1.493432000  |
| C  | -4.352243000 | 0.928399000  | 0.281042000  |
| C  | -5.483829000 | -1.264102000 | 1.571109000  |
| C  | -5.741971000 | 0.814589000  | 0.356559000  |
| C  | -6.316660000 | -0.286199000 | 1.003641000  |
| H  | -3.480591000 | -1.906644000 | 1.943103000  |
| H  | -3.930332000 | 1.790044000  | -0.226805000 |
| H  | -5.939119000 | -2.113048000 | 2.073369000  |
| H  | -6.354307000 | 1.589477000  | -0.089846000 |
| C  | -0.870770000 | 0.081357000  | -3.007436000 |
| C  | 0.164013000  | 0.967558000  | -3.343823000 |
| C  | -2.028448000 | 0.078078000  | -3.789329000 |
| C  | 0.038070000  | 1.827997000  | -4.425330000 |
| C  | -2.165275000 | 0.934718000  | -4.883583000 |
| C  | -1.128540000 | 1.818667000  | -5.207802000 |
| H  | 1.077723000  | 0.989387000  | -2.757377000 |
| H  | -2.845411000 | -0.596834000 | -3.551382000 |
| H  | 0.840065000  | 2.512280000  | -4.688333000 |
| H  | -3.078719000 | 0.899850000  | -5.465831000 |
| O  | -7.655387000 | -0.504755000 | 1.141550000  |
| C  | -8.565902000 | 0.448561000  | 0.603256000  |
| H  | -8.438163000 | 1.435323000  | 1.065521000  |
| H  | -8.460888000 | 0.538216000  | -0.485280000 |
| H  | -9.561476000 | 0.067848000  | 0.837854000  |
| O  | -1.144489000 | 2.700823000  | -6.247136000 |
| C  | -2.286570000 | 2.741890000  | -7.097325000 |
| H  | -2.450623000 | 1.780327000  | -7.599458000 |
| H  | -3.191477000 | 3.026317000  | -6.545867000 |
| H  | -2.067197000 | 3.505483000  | -7.845471000 |

**TSox**

E = -7.50885 Ha

nimag = -155.89 cm<sup>-1</sup>

|    |              |              |              |
|----|--------------|--------------|--------------|
| O  | 6.860850000  | -2.492647000 | 1.678372000  |
| O  | 7.927960000  | -4.040508000 | 1.875016000  |
| H  | 7.651526000  | -2.024562000 | 1.986305000  |
| H  | 7.229805000  | -4.510263000 | 2.355537000  |
| Te | 5.716300000  | -0.884376000 | 0.576281000  |
| H  | 1.262801000  | -3.070795000 | -1.060239000 |
| H  | 4.358973000  | -2.687227000 | 2.791239000  |
| H  | 2.350668000  | -4.063449000 | 2.988571000  |
| C  | 3.965914000  | -2.073687000 | 0.761424000  |
| C  | 3.683651000  | -2.755330000 | 1.945192000  |
| C  | 2.539003000  | -3.545707000 | 2.055429000  |
| C  | 1.660813000  | -3.658499000 | 0.969928000  |
| C  | 1.946017000  | -2.972451000 | -0.221696000 |
| C  | 3.086021000  | -2.189812000 | -0.323691000 |
| H  | 3.287090000  | -1.671627000 | -1.256572000 |
| Te | 4.386887000  | 1.548093000  | 1.238770000  |
| C  | 5.797236000  | 2.848942000  | 0.321567000  |
| C  | 5.756612000  | 3.105927000  | -1.058742000 |
| C  | 6.651311000  | 3.990569000  | -1.641301000 |
| C  | 7.613372000  | 4.648352000  | -0.857235000 |
| C  | 7.661289000  | 4.401120000  | 0.520431000  |
| C  | 6.757801000  | 3.506152000  | 1.095943000  |
| H  | 5.018633000  | 2.613515000  | -1.684597000 |
| H  | 6.620357000  | 4.190255000  | -2.708663000 |
| H  | 8.389884000  | 4.890694000  | 1.155966000  |
| H  | 6.811666000  | 3.326342000  | 2.165548000  |
| O  | 8.439054000  | 5.496188000  | -1.531349000 |
| C  | 9.442145000  | 6.201429000  | -0.806112000 |
| H  | 9.003001000  | 6.860785000  | -0.047128000 |
| H  | 10.152952000 | 5.515251000  | -0.329208000 |
| H  | 9.968118000  | 6.806121000  | -1.546747000 |
| O  | 0.517487000  | -4.397945000 | 0.960477000  |
| C  | 0.162632000  | -5.132299000 | 2.128802000  |
| H  | 0.924578000  | -5.879605000 | 2.382376000  |
| H  | -0.002075000 | -4.469661000 | 2.987499000  |
| H  | -0.771328000 | -5.640116000 | 1.882466000  |

**PCox**

E = -7.60134 Ha

|    |             |              |              |
|----|-------------|--------------|--------------|
| Te | 2.727166000 | 0.896479000  | 14.464978000 |
| Te | 5.360861000 | 1.804878000  | 15.081746000 |
| C  | 3.383090000 | -0.933642000 | 13.545569000 |
| C  | 3.334614000 | -1.027808000 | 12.158381000 |
| C  | 3.690901000 | -2.215963000 | 11.518421000 |
| C  | 4.093978000 | -3.321957000 | 12.278549000 |
| C  | 4.134986000 | -3.223378000 | 13.680120000 |
| C  | 3.780806000 | -2.038491000 | 14.307989000 |
| C  | 4.720509000 | 3.362364000  | 16.383334000 |
| C  | 4.215094000 | 4.559810000  | 15.868398000 |
| C  | 3.816808000 | 5.591824000  | 16.718912000 |
| C  | 3.934748000 | 5.440080000  | 18.105976000 |
| C  | 4.448197000 | 4.241244000  | 18.626623000 |
| C  | 4.830261000 | 3.214526000  | 17.775352000 |
| H  | 3.012126000 | -0.171406000 | 11.571690000 |
| H  | 3.646182000 | -2.262694000 | 10.436595000 |
| O  | 4.460526000 | -4.530761000 | 11.769164000 |
| H  | 4.447122000 | -4.089074000 | 14.257116000 |
| H  | 3.822844000 | -1.986728000 | 15.393506000 |
| H  | 4.107722000 | 4.702930000  | 14.798329000 |
| H  | 3.416487000 | 6.498112000  | 16.280130000 |

|   |             |              |              |
|---|-------------|--------------|--------------|
| O | 3.584059000 | 6.378373000  | 19.030214000 |
| H | 5.216496000 | 2.292818000  | 18.200221000 |
| O | 2.173174000 | 1.820631000  | 12.979474000 |
| O | 2.058442000 | 4.779927000  | 12.747543000 |
| H | 2.066421000 | 3.806030000  | 12.799171000 |
| H | 1.973505000 | 4.959453000  | 11.804192000 |
| C | 3.045309000 | 7.617792000  | 18.578618000 |
| C | 4.443555000 | -4.716743000 | 10.356519000 |
| H | 3.762320000 | 8.166296000  | 17.955266000 |
| H | 2.839761000 | 8.194038000  | 19.482388000 |
| H | 2.111778000 | 7.473229000  | 18.021099000 |
| H | 4.769198000 | -5.745414000 | 10.193328000 |
| H | 5.137136000 | -4.033374000 | 9.851213000  |
| H | 3.435135000 | -4.586978000 | 9.944590000  |
| H | 4.534522000 | 4.131393000  | 19.703955000 |

**(CIPhTe)<sub>2</sub>**

**1**

E = -5.14431 Ha

|    |             |              |             |
|----|-------------|--------------|-------------|
| Te | 4.251082000 | 0.532369000  | 2.324575000 |
| Te | 5.741092000 | 2.818709000  | 2.126422000 |
| C  | 4.032611000 | 0.322079000  | 4.447674000 |
| C  | 5.000834000 | -0.352168000 | 5.200038000 |
| C  | 4.837417000 | -0.532365000 | 6.572518000 |
| C  | 3.692597000 | -0.036077000 | 7.196027000 |
| C  | 2.714698000 | 0.634945000  | 6.462472000 |
| C  | 2.889517000 | 0.810520000  | 5.090325000 |
| C  | 4.224495000 | 4.335138000  | 2.140820000 |
| C  | 3.953439000 | 5.043437000  | 3.316770000 |
| C  | 3.000324000 | 6.061391000  | 3.331109000 |
| C  | 2.311627000 | 6.369332000  | 2.158484000 |
| C  | 2.570814000 | 5.676442000  | 0.975714000 |
| C  | 3.529314000 | 4.664766000  | 0.972018000 |
| H  | 5.893798000 | -0.743309000 | 4.721689000 |
| H  | 5.591264000 | -1.055703000 | 7.152110000 |
| Cl | 3.480054000 | -0.260628000 | 8.911528000 |
| H  | 1.826691000 | 1.015713000  | 6.956985000 |
| H  | 2.123706000 | 1.334596000  | 4.526297000 |
| H  | 4.481705000 | 4.805873000  | 4.235406000 |
| H  | 2.793320000 | 6.608018000  | 4.245673000 |
| Cl | 1.113821000 | 7.635804000  | 2.169282000 |
| H  | 2.032191000 | 5.927155000  | 0.067354000 |
| H  | 3.727830000 | 4.133027000  | 0.046289000 |

**RCox**

E = -5.79992 Ha

|    |              |              |              |
|----|--------------|--------------|--------------|
| Te | -1.467010000 | 0.277211000  | 0.787509000  |
| Te | -0.642199000 | -1.211340000 | -1.363334000 |
| O  | 0.194926000  | 4.348267000  | -0.806361000 |
| O  | -1.200883000 | 4.112873000  | -0.443859000 |
| H  | 0.472327000  | 4.901627000  | -0.058392000 |
| H  | -1.165389000 | 3.166613000  | -0.211847000 |
| C  | -3.580019000 | -0.085137000 | 0.810248000  |
| C  | -4.097252000 | -1.174573000 | 1.519979000  |
| C  | -4.460377000 | 0.785406000  | 0.158354000  |
| C  | -5.471562000 | -1.399507000 | 1.574077000  |
| C  | -5.836993000 | 0.569926000  | 0.206856000  |
| C  | -6.334387000 | -0.524309000 | 0.914230000  |
| H  | -3.432472000 | -1.860559000 | 2.036454000  |
| H  | -4.083935000 | 1.639213000  | -0.396774000 |

|    |              |              |              |
|----|--------------|--------------|--------------|
| H  | -5.868817000 | -2.246197000 | 2.124816000  |
| H  | -6.516847000 | 1.246878000  | -0.300571000 |
| C  | -0.964192000 | 0.128088000  | -3.002595000 |
| C  | -0.037822000 | 1.133479000  | -3.300434000 |
| C  | -2.084195000 | -0.035583000 | -3.825878000 |
| C  | -0.227180000 | 1.969831000  | -4.398155000 |
| C  | -2.278260000 | 0.790448000  | -4.932172000 |
| C  | -1.346731000 | 1.790399000  | -5.210463000 |
| H  | 0.837608000  | 1.280131000  | -2.675618000 |
| H  | -2.816955000 | -0.807829000 | -3.611414000 |
| H  | 0.488018000  | 2.755451000  | -4.618844000 |
| H  | -3.147033000 | 0.660398000  | -5.569583000 |
| Cl | -1.583456000 | 2.828593000  | -6.589440000 |
| Cl | -8.053527000 | -0.800859000 | 0.976409000  |

**TSox**

E = -5.77499 Ha

nimag = -152.61

|    |             |              |             |
|----|-------------|--------------|-------------|
| Te | 5.217124000 | 1.525450000  | 5.364568000 |
| Te | 7.886352000 | 1.805849000  | 4.378925000 |
| Cl | 3.656063000 | 7.849333000  | 4.004204000 |
| Cl | 9.193094000 | -4.700988000 | 3.747884000 |
| C  | 4.740155000 | 3.559598000  | 4.942640000 |
| C  | 4.805804000 | 4.532195000  | 5.943682000 |
| C  | 4.472451000 | 5.854294000  | 5.656067000 |
| C  | 4.074681000 | 6.198846000  | 4.364183000 |
| C  | 4.005065000 | 5.235251000  | 3.358042000 |
| C  | 4.338237000 | 3.914758000  | 3.651956000 |
| C  | 8.256375000 | -0.286339000 | 4.193864000 |
| C  | 7.806818000 | -0.998533000 | 3.074503000 |
| C  | 8.090123000 | -2.355456000 | 2.934615000 |
| C  | 8.833071000 | -3.006438000 | 3.920085000 |
| C  | 9.291338000 | -2.313437000 | 5.040435000 |
| C  | 9.000116000 | -0.956828000 | 5.173269000 |
| H  | 5.103715000 | 4.268433000  | 6.952417000 |
| H  | 4.521293000 | 6.611273000  | 6.432150000 |
| H  | 3.688051000 | 5.511094000  | 2.357651000 |
| H  | 4.275768000 | 3.170507000  | 2.863810000 |
| H  | 7.234581000 | -0.498840000 | 2.299001000 |
| H  | 7.739789000 | -2.902432000 | 2.065157000 |
| H  | 9.868787000 | -2.827687000 | 5.802002000 |
| H  | 9.360005000 | -0.425197000 | 6.048839000 |
| O  | 4.153432000 | 1.754984000  | 7.268507000 |
| O  | 2.567154000 | 1.606298000  | 8.391061000 |
| H  | 4.380133000 | 0.967376000  | 7.786643000 |
| H  | 2.608330000 | 2.541353000  | 8.643565000 |

**PCox**

E = -5.86762 Ha

|    |              |              |              |
|----|--------------|--------------|--------------|
| Te | -2.918551000 | -0.725265000 | 0.736434000  |
| Te | -1.433871000 | -2.964621000 | -0.213747000 |
| O  | -2.543271000 | -4.420882000 | -0.143766000 |
| C  | -1.685047000 | -2.411214000 | -2.287682000 |
| C  | -2.597633000 | -3.140656000 | -3.047335000 |
| C  | -0.913611000 | -1.407945000 | -2.877140000 |
| C  | -2.753474000 | -2.859495000 | -4.403787000 |
| C  | -1.062309000 | -1.123227000 | -4.233212000 |
| C  | -1.984846000 | -1.851423000 | -4.987061000 |
| H  | -3.182073000 | -3.929853000 | -2.581319000 |
| H  | -0.194582000 | -0.833846000 | -2.297579000 |
| H  | -3.463905000 | -3.419488000 | -5.003577000 |

|    |              |              |              |
|----|--------------|--------------|--------------|
| H  | -0.468695000 | -0.344596000 | -4.701167000 |
| C  | -2.332430000 | -0.953200000 | 2.776514000  |
| C  | -2.908938000 | -1.946423000 | 3.578066000  |
| C  | -1.397353000 | -0.073152000 | 3.335511000  |
| C  | -2.547630000 | -2.064284000 | 4.919264000  |
| C  | -1.042549000 | -0.177608000 | 4.679160000  |
| C  | -1.619717000 | -1.176653000 | 5.463257000  |
| H  | -3.632430000 | -2.644867000 | 3.171301000  |
| H  | -0.937955000 | 0.701502000  | 2.729069000  |
| H  | -2.988282000 | -2.842830000 | 5.533546000  |
| H  | -0.320663000 | 0.507859000  | 5.111446000  |
| O  | -4.058083000 | -5.264828000 | 2.296914000  |
| H  | -3.580923000 | -5.057889000 | 1.473712000  |
| H  | -4.715812000 | -5.916747000 | 2.029116000  |
| Cl | -2.174018000 | -1.498364000 | -6.681407000 |
| Cl | -1.173213000 | -1.316504000 | 7.141479000  |

### (NH<sub>2</sub>PhTe)<sub>2</sub>

**1**

E = -6.12641 Ha

|    |              |              |              |
|----|--------------|--------------|--------------|
| Te | -1.496030000 | 0.349194000  | 0.738202000  |
| Te | -0.636168000 | -1.186111000 | -1.377923000 |
| C  | -3.583868000 | -0.083742000 | 0.818937000  |
| C  | -4.065722000 | -1.184859000 | 1.538821000  |
| C  | -4.512811000 | 0.758308000  | 0.193838000  |
| C  | -5.428859000 | -1.440459000 | 1.629072000  |
| C  | -5.877909000 | 0.509589000  | 0.282314000  |
| C  | -6.362635000 | -0.596558000 | 1.002002000  |
| H  | -3.371724000 | -1.855400000 | 2.037356000  |
| H  | -4.171653000 | 1.621195000  | -0.370888000 |
| H  | -5.775863000 | -2.305848000 | 2.190467000  |
| H  | -6.577968000 | 1.177731000  | -0.215734000 |
| C  | -0.938967000 | 0.103249000  | -3.050011000 |
| C  | 0.067810000  | 0.981462000  | -3.471772000 |
| C  | -2.132691000 | 0.060594000  | -3.782228000 |
| C  | -0.110867000 | 1.793794000  | -4.585278000 |
| C  | -2.317816000 | 0.870936000  | -4.896577000 |
| C  | -1.309502000 | 1.754898000  | -5.319351000 |
| H  | 1.004641000  | 1.038531000  | -2.925038000 |
| H  | -2.932873000 | -0.609356000 | -3.481113000 |
| H  | 0.689250000  | 2.463816000  | -4.893992000 |
| H  | -3.253086000 | 0.815092000  | -5.450351000 |
| N  | -7.722804000 | -0.882438000 | 1.042031000  |
| H  | -8.340801000 | -0.100773000 | 0.880712000  |
| H  | -8.027472000 | -1.459893000 | 1.811905000  |
| N  | -1.467869000 | 2.522227000  | -6.467959000 |
| H  | -0.886267000 | 3.344938000  | -6.530017000 |
| H  | -2.420791000 | 2.703582000  | -6.747188000 |

**RCox**

E = -6.78331 Ha

|    |              |              |              |
|----|--------------|--------------|--------------|
| Te | -1.443568000 | 0.248047000  | 0.778396000  |
| Te | -0.630266000 | -1.250210000 | -1.393157000 |
| O  | -0.207025000 | 4.510607000  | -0.824538000 |
| O  | -1.533302000 | 4.034378000  | -0.439736000 |
| H  | 0.032324000  | 5.009150000  | -0.026527000 |
| H  | -1.345906000 | 3.091044000  | -0.270744000 |
| C  | -3.551026000 | -0.074893000 | 0.829755000  |
| C  | -4.088817000 | -1.147513000 | 1.553176000  |
| C  | -4.433015000 | 0.801165000  | 0.183465000  |

|   |              |              |              |
|---|--------------|--------------|--------------|
| C | -5.462599000 | -1.342226000 | 1.628168000  |
| C | -5.808044000 | 0.611791000  | 0.255923000  |
| C | -6.350255000 | -0.464774000 | 0.980015000  |
| H | -3.431654000 | -1.843429000 | 2.066699000  |
| H | -4.051336000 | 1.643391000  | -0.385769000 |
| H | -5.854087000 | -2.185870000 | 2.193206000  |
| H | -6.471213000 | 1.305055000  | -0.257743000 |
| C | -0.919229000 | 0.091981000  | -3.019302000 |
| C | 0.077528000  | 1.006496000  | -3.385202000 |
| C | -2.101601000 | 0.057938000  | -3.770740000 |
| C | -0.102513000 | 1.865683000  | -4.461010000 |
| C | -2.285707000 | 0.913782000  | -4.850053000 |
| C | -1.290771000 | 1.839046000  | -5.212542000 |
| H | 1.003773000  | 1.059350000  | -2.820770000 |
| H | -2.893288000 | -0.638734000 | -3.510905000 |
| H | 0.684430000  | 2.570644000  | -4.720623000 |
| H | -3.212191000 | 0.867026000  | -5.419005000 |
| N | -7.720771000 | -0.689962000 | 1.004468000  |
| H | -8.303848000 | 0.112885000  | 0.819782000  |
| H | -8.063342000 | -1.248103000 | 1.772428000  |
| N | -1.451608000 | 2.664085000  | -6.318594000 |
| H | -0.890779000 | 3.503549000  | -6.323221000 |
| H | -2.404998000 | 2.838628000  | -6.600735000 |

**TSox**

E = -6.76032 Ha

nimag = -158.26 cm<sup>-1</sup>

|    |              |              |              |
|----|--------------|--------------|--------------|
| O  | 6.713174000  | -2.540959000 | 1.918222000  |
| O  | 7.608370000  | -4.083178000 | 2.635364000  |
| H  | 7.402848000  | -2.062626000 | 2.402325000  |
| H  | 7.820196000  | -4.433215000 | 1.756984000  |
| Te | 5.764610000  | -0.920847000 | 0.652484000  |
| H  | 1.213447000  | -2.458433000 | -1.368762000 |
| H  | 4.459436000  | -3.298076000 | 2.289119000  |
| H  | 2.423479000  | -4.655508000 | 2.138400000  |
| C  | 3.993851000  | -2.091164000 | 0.558072000  |
| C  | 3.746846000  | -3.099624000 | 1.496581000  |
| C  | 2.594457000  | -3.869968000 | 1.405314000  |
| C  | 1.654929000  | -3.654623000 | 0.381194000  |
| C  | 1.916472000  | -2.639873000 | -0.558564000 |
| C  | 3.070460000  | -1.873167000 | -0.471495000 |
| H  | 3.241070000  | -1.098527000 | -1.213398000 |
| Te | 4.568335000  | 1.533407000  | 1.422847000  |
| C  | 5.762039000  | 2.808262000  | 0.215905000  |
| C  | 5.441263000  | 3.047438000  | -1.128312000 |
| C  | 6.201947000  | 3.914892000  | -1.900727000 |
| C  | 7.316538000  | 4.578532000  | -1.354508000 |
| C  | 7.635591000  | 4.338749000  | -0.005594000 |
| C  | 6.871728000  | 3.468985000  | 0.762456000  |
| H  | 4.587148000  | 2.553010000  | -1.581243000 |
| H  | 5.927619000  | 4.087262000  | -2.939445000 |
| H  | 8.488854000  | 4.841550000  | 0.444879000  |
| H  | 7.146691000  | 3.304471000  | 1.800081000  |
| N  | 8.041943000  | 5.488286000  | -2.107134000 |
| H  | 7.981087000  | 5.392158000  | -3.109583000 |
| H  | 8.976956000  | 5.691497000  | -1.787189000 |
| N  | 0.533625000  | -4.460938000 | 0.262264000  |
| H  | -0.240536000 | -4.080280000 | -0.260739000 |
| H  | 0.243358000  | -4.949320000 | 1.096041000  |

**PCox**

E = -6.85191 Ha

|    |              |              |              |
|----|--------------|--------------|--------------|
| Te | -2.895613000 | -0.686642000 | 0.747463000  |
| Te | -1.438016000 | -2.947483000 | -0.229123000 |
| O  | -2.555999000 | -4.399009000 | -0.116902000 |
| C  | -1.695480000 | -2.430161000 | -2.295550000 |
| C  | -2.623887000 | -3.148961000 | -3.050243000 |
| C  | -0.921947000 | -1.441019000 | -2.909552000 |
| C  | -2.785900000 | -2.875740000 | -4.402559000 |
| C  | -1.081284000 | -1.166579000 | -4.262199000 |
| C  | -2.019181000 | -1.878613000 | -5.033943000 |
| H  | -3.217541000 | -3.925394000 | -2.574656000 |
| H  | -0.191410000 | -0.867998000 | -2.342843000 |
| H  | -3.511394000 | -3.444235000 | -4.980982000 |
| H  | -0.471447000 | -0.396132000 | -4.729200000 |
| C  | -2.338826000 | -0.927581000 | 2.782718000  |
| C  | -2.985486000 | -1.869704000 | 3.596015000  |
| C  | -1.339673000 | -0.124286000 | 3.350159000  |
| C  | -2.638812000 | -2.006496000 | 4.933724000  |
| C  | -0.998483000 | -0.252820000 | 4.691197000  |
| C  | -1.641142000 | -1.199538000 | 5.509343000  |
| H  | -3.753662000 | -2.518010000 | 3.187714000  |
| H  | -0.819007000 | 0.610751000  | 2.743351000  |
| H  | -3.149347000 | -2.751894000 | 5.539684000  |
| H  | -0.224923000 | 0.387459000  | 5.110430000  |
| O  | -3.916520000 | -5.436837000 | 2.309933000  |
| H  | -3.461953000 | -5.116891000 | 1.508498000  |
| H  | -4.569314000 | -6.058941000 | 1.969049000  |
| N  | -2.139179000 | -1.646052000 | -6.395942000 |
| H  | -1.824937000 | -0.745682000 | -6.725508000 |
| H  | -3.004951000 | -1.938858000 | -6.823598000 |
| N  | -1.340566000 | -1.295688000 | 6.861018000  |
| H  | -0.433653000 | -0.952465000 | 7.140473000  |
| H  | -1.579625000 | -2.169626000 | 7.305746000  |

## (CNPhTe)<sub>2</sub>

1

E = -6.17634 Ha

|    |              |              |              |
|----|--------------|--------------|--------------|
| Te | -1.531490000 | 0.419279000  | 0.708585000  |
| Te | -0.616520000 | -1.173665000 | -1.308041000 |
| C  | -3.623822000 | -0.067476000 | 0.738920000  |
| C  | -4.070387000 | -1.364582000 | 1.017571000  |
| C  | -4.558661000 | 0.954382000  | 0.533833000  |
| C  | -5.430642000 | -1.642119000 | 1.079662000  |
| C  | -5.922656000 | 0.687907000  | 0.607924000  |
| C  | -6.369359000 | -0.615315000 | 0.877555000  |
| H  | -3.359019000 | -2.166533000 | 1.188176000  |
| H  | -4.229746000 | 1.964324000  | 0.307426000  |
| H  | -5.773799000 | -2.649890000 | 1.293713000  |
| H  | -6.644553000 | 1.483089000  | 0.448046000  |
| C  | -0.988257000 | 0.070668000  | -3.021166000 |
| C  | -0.031412000 | 1.004705000  | -3.435773000 |
| C  | -2.168659000 | -0.082447000 | -3.758102000 |
| C  | -0.251189000 | 1.782889000  | -4.567299000 |
| C  | -2.396369000 | 0.691385000  | -4.891646000 |
| C  | -1.437890000 | 1.631633000  | -5.303664000 |
| H  | 0.890610000  | 1.130745000  | -2.876713000 |
| H  | -2.918156000 | -0.805226000 | -3.450807000 |
| H  | 0.492051000  | 2.507283000  | -4.886507000 |
| H  | -3.313277000 | 0.572013000  | -5.460902000 |
| C  | -1.667076000 | 2.429527000  | -6.467212000 |
| N  | -1.852916000 | 3.080539000  | -7.413845000 |

|   |              |              |             |
|---|--------------|--------------|-------------|
| C | -7.768617000 | -0.896829000 | 0.945657000 |
| N | -8.908232000 | -1.127180000 | 1.000255000 |

## RCox

E = -6.83159 Ha

|    |              |              |              |
|----|--------------|--------------|--------------|
| Te | -1.467313000 | 0.298874000  | 0.800994000  |
| Te | -0.621343000 | -1.192963000 | -1.329078000 |
| O  | 0.440125000  | 4.266829000  | -0.738666000 |
| O  | -0.951330000 | 4.220165000  | -0.294617000 |
| H  | 0.823347000  | 4.816602000  | -0.036104000 |
| H  | -1.020203000 | 3.282861000  | -0.038954000 |
| C  | -3.583319000 | -0.074531000 | 0.769372000  |
| C  | -4.104576000 | -1.217847000 | 1.386538000  |
| C  | -4.451421000 | 0.845513000  | 0.169877000  |
| C  | -5.476083000 | -1.446340000 | 1.399306000  |
| C  | -5.825329000 | 0.625570000  | 0.181014000  |
| C  | -6.347207000 | -0.524431000 | 0.795082000  |
| H  | -3.443329000 | -1.937187000 | 1.859669000  |
| H  | -4.063428000 | 1.737137000  | -0.312714000 |
| H  | -5.878694000 | -2.334174000 | 1.877451000  |
| H  | -6.497064000 | 1.339745000  | -0.285504000 |
| C  | -1.025338000 | 0.107941000  | -2.987999000 |
| C  | -0.303754000 | 1.291499000  | -3.180578000 |
| C  | -1.993882000 | -0.273977000 | -3.924481000 |
| C  | -0.553226000 | 2.092399000  | -4.289002000 |
| C  | -2.237338000 | 0.514155000  | -5.044997000 |
| C  | -1.519893000 | 1.706391000  | -5.233029000 |
| H  | 0.453071000  | 1.601541000  | -2.467904000 |
| H  | -2.567433000 | -1.185163000 | -3.783659000 |
| H  | 0.000273000  | 3.015821000  | -4.428617000 |
| H  | -2.987296000 | 0.215599000  | -5.771201000 |
| C  | -1.772764000 | 2.522417000  | -6.378909000 |
| N  | -1.979003000 | 3.185317000  | -7.313009000 |
| C  | -7.757556000 | -0.756547000 | 0.806562000  |
| N  | -8.905550000 | -0.947255000 | 0.815721000  |

## TSox

E = -6.80529 Ha

nimag = -186.86 cm<sup>-1</sup>

|    |             |              |              |
|----|-------------|--------------|--------------|
| O  | 6.873976000 | -2.443882000 | 1.527852000  |
| O  | 8.022598000 | -4.057465000 | 1.468274000  |
| H  | 7.772816000 | -2.101713000 | 1.658281000  |
| H  | 7.495675000 | -4.515424000 | 2.141488000  |
| Te | 5.764110000 | -0.910121000 | 0.491404000  |
| H  | 1.222366000 | -3.067719000 | -0.910979000 |
| H  | 4.544972000 | -2.746868000 | 2.769557000  |
| H  | 2.523345000 | -4.134155000 | 3.055003000  |
| C  | 4.017602000 | -2.108648000 | 0.772218000  |
| C  | 3.818103000 | -2.805185000 | 1.967501000  |
| C  | 2.682567000 | -3.592202000 | 2.127883000  |
| C  | 1.738043000 | -3.688098000 | 1.093187000  |
| C  | 1.946844000 | -2.988749000 | -0.106494000 |
| C  | 3.083315000 | -2.203183000 | -0.263858000 |
| H  | 3.233483000 | -1.672690000 | -1.198908000 |
| Te | 4.321068000 | 1.483403000  | 1.126834000  |
| C  | 5.804170000 | 2.808036000  | 0.349672000  |
| C  | 5.920188000 | 3.026470000  | -1.030045000 |
| C  | 6.860509000 | 3.923257000  | -1.524405000 |
| C  | 7.698658000 | 4.623013000  | -0.640138000 |
| C  | 7.580993000 | 4.408813000  | 0.742828000  |
| C  | 6.641893000 | 3.506113000  | 1.230286000  |

|   |              |              |              |
|---|--------------|--------------|--------------|
| H | 5.272451000  | 2.501716000  | -1.725041000 |
| H | 6.947158000  | 4.089683000  | -2.593818000 |
| H | 8.227033000  | 4.948357000  | 1.428658000  |
| H | 6.564618000  | 3.348013000  | 2.301369000  |
| C | 0.569476000  | -4.494474000 | 1.259588000  |
| N | -0.383433000 | -5.148155000 | 1.396043000  |
| C | 8.663423000  | 5.548458000  | -1.144950000 |
| N | 9.449076000  | 6.302144000  | -1.556148000 |

**PCox**

E = -6.89846 Ha

|    |              |              |              |
|----|--------------|--------------|--------------|
| Te | -2.864940000 | -0.732329000 | 0.713923000  |
| Te | -1.408553000 | -3.000259000 | -0.211287000 |
| O  | -2.537629000 | -4.439005000 | -0.152385000 |
| C  | -1.672364000 | -2.417679000 | -2.283943000 |
| C  | -2.603355000 | -3.132263000 | -3.036128000 |
| C  | -0.895484000 | -1.414420000 | -2.867540000 |
| C  | -2.773286000 | -2.832705000 | -4.384289000 |
| C  | -1.059520000 | -1.113659000 | -4.215538000 |
| C  | -2.002750000 | -1.820776000 | -4.981081000 |
| H  | -3.187682000 | -3.919980000 | -2.567759000 |
| H  | -0.164188000 | -0.857179000 | -2.287585000 |
| H  | -3.498819000 | -3.378860000 | -4.979540000 |
| H  | -0.462884000 | -0.334897000 | -4.680471000 |
| C  | -2.317825000 | -0.956866000 | 2.768491000  |
| C  | -2.882334000 | -1.973434000 | 3.549957000  |
| C  | -1.428980000 | -0.041760000 | 3.348611000  |
| C  | -2.550831000 | -2.079559000 | 4.897068000  |
| C  | -1.108263000 | -0.135904000 | 4.698361000  |
| C  | -1.665855000 | -1.159484000 | 5.482445000  |
| H  | -3.573022000 | -2.692230000 | 3.122986000  |
| H  | -0.983379000 | 0.747710000  | 2.751531000  |
| H  | -2.981343000 | -2.874998000 | 5.497599000  |
| H  | -0.423110000 | 0.576146000  | 5.148249000  |
| O  | -4.077429000 | -5.169494000 | 2.322880000  |
| H  | -3.612582000 | -5.036405000 | 1.478746000  |
| H  | -4.722775000 | -5.860150000 | 2.133477000  |
| C  | -1.331649000 | -1.261944000 | 6.868412000  |
| N  | -1.056860000 | -1.342520000 | 7.996442000  |
| C  | -2.173927000 | -1.511088000 | -6.366291000 |
| N  | -2.312827000 | -1.257394000 | -7.493385000 |

**(NO<sub>2</sub>PhTe)<sub>2</sub>**

**1**

E = -6.36503 Ha

|    |              |              |              |
|----|--------------|--------------|--------------|
| Te | -3.839485000 | -1.505898000 | 1.149516000  |
| Te | -2.820084000 | -3.448132000 | -0.427810000 |
| C  | -1.873851000 | -2.368323000 | -2.026384000 |
| C  | -1.333120000 | -3.148050000 | -3.058118000 |
| C  | -1.774289000 | -0.976626000 | -2.084186000 |
| C  | -0.698990000 | -2.543020000 | -4.137493000 |
| C  | -1.142244000 | -0.364439000 | -3.161898000 |
| C  | -0.609866000 | -1.152992000 | -4.179529000 |
| H  | -1.399938000 | -4.233120000 | -3.036293000 |
| H  | -2.190503000 | -0.358887000 | -1.294686000 |
| H  | -0.277953000 | -3.134981000 | -4.941678000 |
| H  | -1.058760000 | 0.714737000  | -3.219011000 |
| C  | -2.253637000 | -1.097050000 | 2.539873000  |
| C  | -0.956465000 | -1.600511000 | 2.420524000  |
| C  | -2.578648000 | -0.258526000 | 3.615010000  |

|   |              |              |              |
|---|--------------|--------------|--------------|
| C | 0.010687000  | -1.273519000 | 3.365650000  |
| C | -1.616207000 | 0.075034000  | 4.561494000  |
| C | -0.327423000 | -0.437738000 | 4.427740000  |
| H | -0.690216000 | -2.254523000 | 1.596317000  |
| H | -3.583059000 | 0.141098000  | 3.731855000  |
| H | 1.020857000  | -1.658149000 | 3.285224000  |
| H | -1.855559000 | 0.720814000  | 5.398189000  |
| N | 0.063180000  | -0.502316000 | -5.329099000 |
| N | 0.702166000  | -0.088051000 | 5.435681000  |
| O | 1.830079000  | -0.555777000 | 5.282975000  |
| O | 0.364453000  | 0.648220000  | 6.362308000  |
| O | 0.519344000  | -1.232020000 | -6.209034000 |
| O | 0.123518000  | 0.726791000  | -5.332152000 |

**RCox**

E = -7.01873 Ha

|    |              |              |              |
|----|--------------|--------------|--------------|
| Te | -1.453419000 | 0.266950000  | 0.791853000  |
| Te | -0.649953000 | -1.201343000 | -1.366114000 |
| O  | 0.213133000  | 4.377761000  | -0.687945000 |
| O  | -1.129646000 | 4.265682000  | -0.122344000 |
| H  | 0.634854000  | 4.934062000  | -0.013089000 |
| H  | -1.138783000 | 3.320886000  | 0.112991000  |
| C  | -3.574181000 | -0.089942000 | 0.780758000  |
| C  | -4.096072000 | -1.220907000 | 1.420142000  |
| C  | -4.440630000 | 0.829556000  | 0.177598000  |
| C  | -5.470674000 | -1.438173000 | 1.453341000  |
| C  | -5.817551000 | 0.621128000  | 0.207278000  |
| C  | -6.314414000 | -0.512240000 | 0.844969000  |
| H  | -3.435205000 | -1.938980000 | 1.895459000  |
| H  | -4.051522000 | 1.711371000  | -0.321498000 |
| H  | -5.889814000 | -2.308632000 | 1.944336000  |
| H  | -6.500881000 | 1.323217000  | -0.256002000 |
| C  | -1.024744000 | 0.120962000  | -3.015087000 |
| C  | -0.442305000 | 1.390901000  | -3.095389000 |
| C  | -1.824778000 | -0.345138000 | -4.066271000 |
| C  | -0.663796000 | 2.194719000  | -4.209126000 |
| C  | -2.036338000 | 0.445717000  | -5.192895000 |
| C  | -1.454936000 | 1.709336000  | -5.248548000 |
| H  | 0.186005000  | 1.767085000  | -2.295589000 |
| H  | -2.294722000 | -1.322667000 | -4.012537000 |
| H  | -0.225081000 | 3.183174000  | -4.278147000 |
| H  | -2.652138000 | 0.098119000  | -6.014082000 |
| N  | -7.786592000 | -0.739652000 | 0.880034000  |
| O  | -8.190037000 | -1.748704000 | 1.454494000  |
| O  | -8.502205000 | 0.095872000  | 0.332352000  |
| N  | -1.684030000 | 2.560508000  | -6.447008000 |
| O  | -2.403669000 | 2.107466000  | -7.335769000 |
| O  | -1.138457000 | 3.661769000  | -6.473748000 |

**TSox**

E = -6.99263 Ha

nimag = -202.77 cm<sup>-1</sup>

|    |             |              |              |
|----|-------------|--------------|--------------|
| O  | 6.868316000 | -2.559188000 | 1.322037000  |
| O  | 7.971294000 | -4.193610000 | 1.063921000  |
| H  | 7.788557000 | -2.264382000 | 1.416450000  |
| H  | 7.489187000 | -4.687014000 | 1.745791000  |
| Te | 5.763866000 | -0.926511000 | 0.459884000  |
| H  | 1.059998000 | -2.799097000 | -0.852050000 |
| H  | 4.619138000 | -2.954729000 | 2.612444000  |
| H  | 2.553737000 | -4.309246000 | 2.874944000  |
| C  | 3.993003000 | -2.093474000 | 0.730004000  |



|    |              |              |              |
|----|--------------|--------------|--------------|
| C  | 3.843455000  | -2.906645000 | 1.857062000  |
| C  | 2.691083000  | -3.673686000 | 2.008013000  |
| C  | 1.704941000  | -3.616557000 | 1.027513000  |
| C  | 1.842042000  | -2.814880000 | -0.102265000 |
| C  | 2.995160000  | -2.049521000 | -0.249045000 |
| H  | 3.106801000  | -1.427354000 | -1.131348000 |
| Te | 4.436796000  | 1.460645000  | 1.325584000  |
| C  | 5.840833000  | 2.802544000  | 0.439789000  |
| C  | 5.901927000  | 2.971798000  | -0.950810000 |
| C  | 6.791936000  | 3.882871000  | -1.510945000 |
| C  | 7.613113000  | 4.630906000  | -0.670332000 |
| C  | 7.565721000  | 4.484893000  | 0.713416000  |
| C  | 6.679396000  | 3.564420000  | 1.265779000  |
| H  | 5.250463000  | 2.400019000  | -1.603672000 |
| H  | 6.848983000  | 4.023091000  | -2.584052000 |
| H  | 8.217872000  | 5.080804000  | 1.341151000  |
| H  | 6.646760000  | 3.442095000  | 2.343725000  |
| N  | 0.470006000  | -4.435646000 | 1.190246000  |
| O  | 0.378822000  | -5.125594000 | 2.202618000  |
| O  | -0.375982000 | -4.365006000 | 0.301926000  |
| N  | 8.562069000  | 5.611181000  | -1.265593000 |
| O  | 9.268300000  | 6.256315000  | -0.493540000 |
| O  | 8.577645000  | 5.711906000  | -2.490670000 |

#### PCox

E = -7.08556 Ha

|    |              |              |              |
|----|--------------|--------------|--------------|
| Te | -2.833717000 | -0.752991000 | 0.741526000  |
| Te | -1.420284000 | -3.020707000 | -0.249657000 |
| O  | -2.563292000 | -4.447994000 | -0.202426000 |

|   |              |              |              |
|---|--------------|--------------|--------------|
| C | -1.720006000 | -2.381772000 | -2.302505000 |
| C | -2.679181000 | -3.061495000 | -3.051729000 |
| C | -0.938375000 | -1.376008000 | -2.876001000 |
| C | -2.874169000 | -2.722969000 | -4.389143000 |
| C | -1.126384000 | -1.035684000 | -4.212939000 |
| C | -2.095297000 | -1.713820000 | -4.949632000 |
| H | -3.266698000 | -3.851902000 | -2.592361000 |
| H | -0.185354000 | -0.846512000 | -2.298081000 |
| H | -3.616530000 | -3.230380000 | -4.994189000 |
| H | -0.536548000 | -0.258436000 | -4.684269000 |
| C | -2.249002000 | -1.000337000 | 2.783573000  |
| C | -2.788986000 | -2.032284000 | 3.562603000  |
| C | -1.364070000 | -0.077557000 | 3.358445000  |
| C | -2.437542000 | -2.145529000 | 4.905776000  |
| C | -1.021769000 | -0.178978000 | 4.703670000  |
| C | -1.562644000 | -1.215324000 | 5.460533000  |
| H | -3.477568000 | -2.755445000 | 3.139754000  |
| H | -0.937690000 | 0.723013000  | 2.762296000  |
| H | -2.841621000 | -2.943452000 | 5.517691000  |
| H | -0.341953000 | 0.528138000  | 5.164225000  |
| O | -4.065479000 | -5.177745000 | 2.299179000  |
| H | -3.622504000 | -5.053492000 | 1.442346000  |
| H | -4.728879000 | -5.856381000 | 2.129850000  |
| N | -2.300617000 | -1.348775000 | -6.381078000 |
| N | -1.194535000 | -1.328704000 | 6.899308000  |
| O | -1.703886000 | -2.241665000 | 7.544873000  |
| O | -0.404103000 | -0.500580000 | 7.348796000  |
| O | -3.159421000 | -1.967069000 | -7.004721000 |
| O | -1.597565000 | -0.452635000 | -6.842406000 |

**Table S6** Geometries of the stationary points and transition states for the isomerization of the selenoxides and telluroxides. Level of theory ZORA-OLYP/TZ2P

### (HSe)<sub>2</sub>

#### 2

E = -0.66076 Ha

|    |             |              |             |
|----|-------------|--------------|-------------|
| O  | 6.458149000 | -1.435216000 | 1.610933000 |
| Se | 5.581201000 | -0.812504000 | 0.367952000 |
| Se | 4.435381000 | 1.269947000  | 1.011516000 |
| H  | 4.203535000 | -1.453271000 | 0.508610000 |
| H  | 5.590452000 | 2.060197000  | 0.548443000 |

#### TSiso

E = -0.58830 Ha

nimag = -351.64 cm<sup>-1</sup>

|    |              |              |              |
|----|--------------|--------------|--------------|
| Se | -1.524100000 | -0.727800000 | 1.051700000  |
| Se | -0.624300000 | -0.236100000 | -1.266000000 |
| H  | -1.316200000 | -1.510000000 | -1.717400000 |
| H  | -2.884800000 | -0.151500000 | 0.828800000  |
| O  | -0.500400000 | 0.718800000  | 0.598500000  |

#### 3

E = -0.64555 Ha

|    |              |              |              |
|----|--------------|--------------|--------------|
| Se | 0.016185000  | 1.596437000  | -0.179880000 |
| Se | -0.016185000 | -1.596437000 | -0.179880000 |
| O  | 0.000000000  | 0.000000000  | -1.105657000 |
| H  | -1.449973000 | 1.686156000  | 0.028662000  |
| H  | 1.449973000  | -1.686156000 | 0.028662000  |

### (CH<sub>3</sub>Se)<sub>2</sub>

#### 2

E = -1.84325 Ha

|    |              |              |              |
|----|--------------|--------------|--------------|
| Se | -2.130297000 | -0.491947000 | 1.087751000  |
| Se | -0.432242000 | -0.950405000 | -0.631562000 |
| H  | -1.276730000 | -1.570339000 | -2.910722000 |
| C  | -1.827855000 | -1.291844000 | -2.010892000 |
| H  | -2.448709000 | -2.119248000 | -1.668000000 |
| H  | -2.408809000 | -0.381912000 | -2.170539000 |
| C  | -0.849858000 | -0.078763000 | 2.524574000  |
| H  | -0.221537000 | -0.946832000 | 2.723662000  |
| H  | -0.250660000 | 0.795860000  | 2.269365000  |
| H  | -1.461128000 | 0.140799000  | 3.402569000  |
| O  | 0.248402000  | -2.429792000 | -0.372938000 |

#### TSiso

E = -1.77250 Ha

nimag = -299.52 cm<sup>-1</sup>

|    |              |              |              |
|----|--------------|--------------|--------------|
| Se | -1.572322000 | -0.706937000 | 1.053297000  |
| Se | -0.608197000 | -0.257550000 | -1.286293000 |
| O  | -0.530238000 | 0.703538000  | 0.552584000  |
| C  | -3.339673000 | 0.140505000  | 1.076758000  |
| H  | -3.545257000 | 0.580006000  | 0.101435000  |
| H  | -4.067411000 | -0.640178000 | 1.316863000  |

|   |              |              |              |
|---|--------------|--------------|--------------|
| H | -3.333013000 | 0.903090000  | 1.858849000  |
| C | -1.325174000 | -1.985910000 | -2.025519000 |
| H | -0.990588000 | -1.921416000 | -3.071269000 |
| H | -0.867891000 | -2.853913000 | -1.550267000 |
| H | -2.414033000 | -2.031614000 | -1.987431000 |

**3**

E = -1.82849 Ha

|    |              |              |              |
|----|--------------|--------------|--------------|
| Se | -1.982904000 | -0.518461000 | 1.145853000  |
| Se | -0.136643000 | -1.634137000 | -1.208105000 |
| H  | 1.454954000  | -0.041179000 | -2.247719000 |
| C  | 0.478143000  | 0.128728000  | -1.783239000 |
| H  | -0.212759000 | 0.546166000  | -2.516865000 |
| H  | 0.594585000  | 0.787856000  | -0.921386000 |
| C  | -2.040543000 | -2.209885000 | 2.121733000  |
| H  | -2.217017000 | -1.936779000 | 3.167203000  |
| H  | -2.863514000 | -2.825566000 | 1.756363000  |
| H  | -1.083821000 | -2.727859000 | 2.037067000  |
| O  | -1.808738000 | -1.173110000 | -0.572722000 |

**(PhSe)<sub>2</sub>**

**2**

E = -5.51356 Ha

|    |              |              |              |
|----|--------------|--------------|--------------|
| Se | -2.666148000 | -0.729703000 | 0.630441000  |
| Se | -1.634217000 | -2.871745000 | -0.110275000 |
| O  | -2.711436000 | -4.100714000 | 0.102148000  |
| C  | -1.813250000 | -2.391121000 | -2.022253000 |
| C  | -2.821055000 | -3.000456000 | -2.762931000 |
| C  | -0.890252000 | -1.530414000 | -2.616328000 |
| C  | -2.916038000 | -2.726668000 | -4.127873000 |
| C  | -0.992548000 | -1.266788000 | -3.982302000 |
| C  | -2.005509000 | -1.861890000 | -4.736294000 |
| H  | -3.510694000 | -3.681891000 | -2.272525000 |
| H  | -0.102169000 | -1.063064000 | -2.030896000 |
| H  | -3.702387000 | -3.193297000 | -4.716271000 |
| H  | -0.280034000 | -0.596119000 | -4.456124000 |
| H  | -2.081988000 | -1.653572000 | -5.800442000 |
| C  | -2.300512000 | -0.910490000 | 2.514361000  |
| C  | -3.130347000 | -1.700274000 | 3.320891000  |
| C  | -1.232891000 | -0.209063000 | 3.089838000  |
| C  | -2.886310000 | -1.788459000 | 4.690818000  |
| C  | -1.002771000 | -0.294866000 | 4.462543000  |
| C  | -1.826487000 | -1.085282000 | 5.264433000  |
| H  | -3.958605000 | -2.243474000 | 2.877313000  |
| H  | -0.588734000 | 0.403595000  | 2.466291000  |
| H  | -3.530677000 | -2.406902000 | 5.310886000  |
| H  | -0.175572000 | 0.255828000  | 4.903928000  |
| H  | -1.643361000 | -1.152583000 | 6.333863000  |

**TSiso**

E = -5.44626 Ha

nimag = -289.91 cm<sup>-1</sup>

|    |              |              |              |
|----|--------------|--------------|--------------|
| Se | -1.838265000 | -0.756328000 | 0.932025000  |
| Se | -0.554306000 | -0.353407000 | -1.324727000 |
| O  | -0.671929000 | 0.581099000  | 0.564234000  |
| C  | -3.526135000 | 0.163113000  | 0.950300000  |
| C  | -4.663783000 | -0.556949000 | 1.339387000  |
| C  | -3.619240000 | 1.515860000  | 0.613208000  |
| C  | -5.899181000 | 0.084337000  | 1.381279000  |

|   |              |              |              |
|---|--------------|--------------|--------------|
| C | -4.860230000 | 2.147679000  | 0.674117000  |
| C | -6.001274000 | 1.437787000  | 1.051543000  |
| H | -4.591762000 | -1.607634000 | 1.612475000  |
| H | -2.728175000 | 2.057502000  | 0.313027000  |
| H | -6.783071000 | -0.473929000 | 1.680019000  |
| H | -4.935009000 | 3.202150000  | 0.418936000  |
| H | -6.966245000 | 1.936220000  | 1.090843000  |
| C | -1.311808000 | -1.957234000 | -2.159492000 |
| C | -2.521413000 | -1.887007000 | -2.866552000 |
| C | -0.586820000 | -3.157777000 | -2.146308000 |
| C | -2.986505000 | -2.997956000 | -3.567684000 |
| C | -1.056130000 | -4.266853000 | -2.849219000 |
| C | -2.256200000 | -4.188710000 | -3.558129000 |
| H | -3.089128000 | -0.960761000 | -2.873042000 |
| H | 0.347448000  | -3.216591000 | -1.594449000 |
| H | -3.918659000 | -2.934855000 | -4.124530000 |
| H | -0.484758000 | -5.192276000 | -2.843963000 |
| H | -2.622926000 | -5.055212000 | -4.102986000 |

**3**

E = -5.49865 Ha

|    |              |              |              |
|----|--------------|--------------|--------------|
| Se | -1.185930000 | -0.902809000 | -1.218254000 |
| Se | 1.298742000  | 1.098538000  | -1.611080000 |
| C  | -0.147315000 | -2.496367000 | -0.937412000 |
| C  | -0.124180000 | -3.057447000 | 0.345574000  |
| C  | 0.551012000  | -4.258119000 | 0.567587000  |
| C  | 1.236692000  | -4.880486000 | -0.474702000 |
| C  | 1.231602000  | -4.306363000 | -1.748279000 |
| C  | 0.528752000  | -3.128383000 | -1.988671000 |
| C  | 0.339477000  | 2.705165000  | -1.170691000 |
| C  | 0.329756000  | 3.153582000  | 0.156464000  |
| C  | -0.311408000 | 4.349223000  | 0.483054000  |
| C  | -0.968640000 | 5.082979000  | -0.503606000 |
| C  | -0.973753000 | 4.627576000  | -1.824457000 |
| C  | -0.310509000 | 3.451147000  | -2.163756000 |
| H  | -0.623103000 | -2.555205000 | 1.170061000  |
| H  | 0.558561000  | -4.693118000 | 1.564153000  |
| H  | 1.776470000  | -5.806952000 | -0.296444000 |
| H  | 1.764778000  | -4.787980000 | -2.564626000 |
| H  | 0.507686000  | -2.698208000 | -2.985231000 |
| H  | 0.816875000  | 2.566590000  | 0.929576000  |
| H  | -0.310301000 | 4.696781000  | 1.513356000  |
| H  | -1.477582000 | 6.008370000  | -0.245684000 |
| H  | -1.483549000 | 5.199648000  | -2.595983000 |
| H  | -0.296146000 | 3.108963000  | -3.194166000 |
| O  | -0.072841000 | 0.061961000  | -2.330609000 |

**(CH<sub>3</sub>PhSe)<sub>2</sub>**

**2**

E = -6.68982 Ha

|    |              |              |              |
|----|--------------|--------------|--------------|
| Se | -2.677315000 | -0.739435000 | 0.634919000  |
| Se | -1.631707000 | -2.875618000 | -0.115242000 |
| O  | -2.700938000 | -4.113136000 | 0.093825000  |
| C  | -1.809401000 | -2.394281000 | -2.022202000 |
| C  | -2.805784000 | -3.006677000 | -2.773857000 |
| C  | -0.895004000 | -1.527184000 | -2.619522000 |
| C  | -2.895718000 | -2.730403000 | -4.137391000 |
| C  | -0.996748000 | -1.264423000 | -3.983625000 |
| C  | -1.999609000 | -1.855785000 | -4.765710000 |
| H  | -3.493389000 | -3.697631000 | -2.293901000 |

|   |              |              |              |
|---|--------------|--------------|--------------|
| H | -0.108339000 | -1.053492000 | -2.037050000 |
| H | -3.677305000 | -3.210317000 | -4.722433000 |
| H | -0.281174000 | -0.588261000 | -4.446438000 |
| C | -2.305627000 | -0.909403000 | 2.515606000  |
| C | -3.152839000 | -1.658702000 | 3.342061000  |
| C | -1.217031000 | -0.238850000 | 3.085427000  |
| C | -2.905987000 | -1.733892000 | 4.710029000  |
| C | -0.986348000 | -0.316623000 | 4.457497000  |
| C | -1.821476000 | -1.066039000 | 5.295585000  |
| H | -4.002903000 | -2.181213000 | 2.914772000  |
| H | -0.554334000 | 0.350188000  | 2.458285000  |
| H | -3.575915000 | -2.321935000 | 5.333829000  |
| H | -0.138950000 | 0.218271000  | 4.880986000  |
| C | -2.120068000 | -1.539584000 | -6.234302000 |
| H | -1.138258000 | -1.409287000 | -6.699369000 |
| H | -2.651623000 | -2.328297000 | -6.773337000 |
| H | -2.676921000 | -0.605954000 | -6.386216000 |
| C | -1.552107000 | -1.173484000 | 6.774274000  |
| H | -2.481853000 | -1.185161000 | 7.351320000  |
| H | -1.016746000 | -2.103332000 | 7.005951000  |
| H | -0.937539000 | -0.343678000 | 7.133569000  |

### TSiso

E = -6.62261 Ha

nimag = -289.40 cm<sup>-1</sup>

|    |              |              |              |
|----|--------------|--------------|--------------|
| Se | -1.877976000 | -0.769080000 | 0.919150000  |
| Se | -0.560294000 | -0.363846000 | -1.329879000 |
| O  | -0.693120000 | 0.556825000  | 0.573507000  |
| C  | -3.546539000 | 0.178572000  | 0.964206000  |
| C  | -4.693399000 | -0.509713000 | 1.381590000  |
| C  | -3.631556000 | 1.527070000  | 0.612566000  |
| C  | -5.913781000 | 0.154728000  | 1.437860000  |
| C  | -4.860352000 | 2.178486000  | 0.690252000  |
| C  | -6.023210000 | 1.511975000  | 1.098726000  |
| H  | -4.641247000 | -1.558904000 | 1.665233000  |
| H  | -2.741554000 | 2.054813000  | 0.285476000  |
| H  | -6.797220000 | -0.393024000 | 1.759154000  |
| H  | -4.913640000 | 3.230601000  | 0.418095000  |
| C  | -1.285124000 | -1.969422000 | -2.173997000 |
| C  | -2.502134000 | -1.932255000 | -2.871451000 |
| C  | -0.540304000 | -3.156967000 | -2.177379000 |
| C  | -2.944026000 | -3.048312000 | -3.573797000 |
| C  | -0.990703000 | -4.269650000 | -2.884334000 |
| C  | -2.198442000 | -4.237978000 | -3.594751000 |
| H  | -3.098027000 | -1.023681000 | -2.867444000 |
| H  | 0.397997000  | -3.205636000 | -1.631146000 |
| H  | -3.885371000 | -2.995828000 | -4.117510000 |
| C  | -7.343105000 | 2.231703000  | 1.200319000  |
| H  | -8.176792000 | 1.587295000  | 0.904347000  |
| H  | -7.534921000 | 2.554586000  | 2.232006000  |
| H  | -7.363111000 | 3.125231000  | 0.570384000  |
| H  | -0.393288000 | -5.179104000 | -2.881071000 |
| C  | -2.673500000 | -5.432965000 | -4.378645000 |
| H  | -2.414180000 | -5.327835000 | -5.440265000 |
| H  | -2.215443000 | -6.358756000 | -4.020530000 |
| H  | -3.760840000 | -5.543477000 | -4.323120000 |

### 3

E = -6.67492 Ha

|    |             |             |             |
|----|-------------|-------------|-------------|
| Se | 5.062710000 | 1.369142000 | 4.789228000 |
| Se | 8.222573000 | 1.879041000 | 5.162284000 |

|   |              |              |             |
|---|--------------|--------------|-------------|
| C | 4.595813000  | 3.194356000  | 4.417241000 |
| C | 4.570592000  | 3.644454000  | 3.093073000 |
| C | 4.171597000  | 4.949631000  | 2.803076000 |
| C | 3.819849000  | 5.844001000  | 3.819309000 |
| C | 3.866978000  | 5.383120000  | 5.145401000 |
| C | 4.233638000  | 4.076744000  | 5.445182000 |
| C | 8.748654000  | 0.080693000  | 4.741129000 |
| C | 9.102538000  | -0.244287000 | 3.427501000 |
| C | 9.542906000  | -1.531398000 | 3.117617000 |
| C | 9.609247000  | -2.530812000 | 4.093941000 |
| C | 9.235279000  | -2.193664000 | 5.405160000 |
| C | 8.825601000  | -0.906957000 | 5.733302000 |
| H | 4.866093000  | 2.977582000  | 2.288206000 |
| H | 4.151264000  | 5.278347000  | 1.766348000 |
| H | 3.596468000  | 6.055675000  | 5.957066000 |
| H | 4.242267000  | 3.738198000  | 6.477037000 |
| H | 9.030481000  | 0.505626000  | 2.644906000 |
| H | 9.821624000  | -1.762067000 | 2.091745000 |
| H | 9.281158000  | -2.949093000 | 6.187152000 |
| H | 8.561870000  | -0.666020000 | 6.758847000 |
| O | 6.540107000  | 1.593386000  | 5.893897000 |
| C | 3.402300000  | 7.258872000  | 3.512235000 |
| H | 3.424068000  | 7.461822000  | 2.438721000 |
| H | 2.385662000  | 7.457263000  | 3.871653000 |
| H | 4.062231000  | 7.981950000  | 4.005621000 |
| C | 10.053836000 | -3.930557000 | 3.757108000 |
| H | 10.847758000 | -4.268747000 | 4.432260000 |
| H | 9.224269000  | -4.641200000 | 3.857639000 |
| H | 10.428804000 | -3.999223000 | 2.732926000 |

### (CH<sub>3</sub>OPhSe)<sub>2</sub>

### 2

E = -7.12734 Ha

|    |              |              |              |
|----|--------------|--------------|--------------|
| Se | -2.710061000 | -0.839657000 | 0.647433000  |
| Se | -1.558569000 | -2.914896000 | -0.146237000 |
| O  | -2.571492000 | -4.204656000 | 0.037501000  |
| C  | -1.735522000 | -2.427381000 | -2.043127000 |
| C  | -2.676856000 | -3.091135000 | -2.818957000 |
| C  | -0.870304000 | -1.494020000 | -2.622718000 |
| C  | -2.776101000 | -2.820118000 | -4.184152000 |
| C  | -0.961338000 | -1.221566000 | -3.979217000 |
| C  | -1.917442000 | -1.880968000 | -4.771325000 |
| H  | -3.328503000 | -3.826946000 | -2.355502000 |
| H  | -0.127388000 | -0.972227000 | -2.024350000 |
| H  | -3.518910000 | -3.347450000 | -4.771082000 |
| H  | -0.300350000 | -0.499076000 | -4.448991000 |
| C  | -2.288409000 | -0.983679000 | 2.514009000  |
| C  | -3.099562000 | -1.734553000 | 3.370623000  |
| C  | -1.188603000 | -0.297491000 | 3.055061000  |
| C  | -2.829267000 | -1.806592000 | 4.736916000  |
| C  | -0.914466000 | -0.358968000 | 4.412698000  |
| C  | -1.732408000 | -1.115351000 | 5.267888000  |
| H  | -3.952471000 | -2.274003000 | 2.970683000  |
| H  | -0.547466000 | 0.292806000  | 2.407239000  |
| H  | -3.479448000 | -2.400903000 | 5.368072000  |
| H  | -0.067049000 | 0.173931000  | 4.834455000  |
| O  | -1.372608000 | -1.106203000 | 6.582569000  |
| C  | -2.151400000 | -1.851295000 | 7.513568000  |
| H  | -3.186540000 | -1.489932000 | 7.554807000  |
| H  | -2.146584000 | -2.922830000 | 7.278206000  |
| H  | -1.677176000 | -1.694232000 | 8.483907000  |

|   |              |              |              |
|---|--------------|--------------|--------------|
| O | -1.918354000 | -1.536168000 | -6.089548000 |
| C | -2.857364000 | -2.157201000 | -6.962326000 |
| H | -2.708305000 | -3.243125000 | -7.009001000 |
| H | -3.890554000 | -1.941452000 | -6.663178000 |
| H | -2.670638000 | -1.726063000 | -7.947318000 |

**TSiso**

E = -7.06081 Ha  
 nimag = -289.16 cm<sup>-1</sup>

|    |              |              |              |
|----|--------------|--------------|--------------|
| Se | -1.981131000 | -0.783259000 | 0.870920000  |
| Se | -0.597141000 | -0.391834000 | -1.372347000 |
| O  | -0.758125000 | 0.511624000  | 0.557968000  |
| C  | -3.604108000 | 0.228814000  | 0.970130000  |
| C  | -4.771585000 | -0.405156000 | 1.426376000  |
| C  | -3.644357000 | 1.577985000  | 0.618878000  |
| C  | -5.957336000 | 0.303869000  | 1.520673000  |
| C  | -4.832598000 | 2.299904000  | 0.728838000  |
| C  | -5.999472000 | 1.666253000  | 1.175295000  |
| H  | -4.757785000 | -1.453827000 | 1.715842000  |
| H  | -2.741045000 | 2.065505000  | 0.266567000  |
| H  | -6.866274000 | -0.175829000 | 1.872132000  |
| H  | -4.832137000 | 3.349210000  | 0.457461000  |
| C  | -1.236590000 | -2.021812000 | -2.207000000 |
| C  | -2.475752000 | -2.071651000 | -2.874134000 |
| C  | -0.422237000 | -3.162312000 | -2.228454000 |
| C  | -2.865842000 | -3.206115000 | -3.563133000 |
| C  | -0.800494000 | -4.311651000 | -2.920407000 |
| C  | -2.030164000 | -4.339026000 | -3.593694000 |
| H  | -3.129724000 | -1.204229000 | -2.856609000 |
| H  | 0.530060000  | -3.148699000 | -1.704937000 |
| H  | -3.813063000 | -3.243239000 | -4.094159000 |
| H  | -0.136582000 | -5.168381000 | -2.926259000 |
| O  | -7.217130000 | 2.266507000  | 1.313520000  |
| C  | -7.339414000 | 3.648912000  | 0.996572000  |
| H  | -6.694775000 | 4.268192000  | 1.632916000  |
| H  | -7.107828000 | 3.844156000  | -0.058108000 |
| H  | -8.383616000 | 3.902494000  | 1.187829000  |
| O  | -2.511828000 | -5.397288000 | -4.299372000 |
| C  | -1.733306000 | -6.588814000 | -4.378315000 |
| H  | -0.766649000 | -6.406497000 | -4.863400000 |
| H  | -1.569882000 | -7.029195000 | -3.387207000 |
| H  | -2.317868000 | -7.279748000 | -4.987914000 |

**3**

E = -7.11296 Ha

|    |             |              |              |
|----|-------------|--------------|--------------|
| Se | 2.785031000 | 1.340311000  | 14.012210000 |
| Se | 5.528868000 | 1.919822000  | 15.622480000 |
| C  | 3.282254000 | -0.353491000 | 13.269005000 |
| C  | 3.638956000 | -0.467704000 | 11.920666000 |
| C  | 3.980022000 | -1.700217000 | 11.368075000 |
| C  | 3.952256000 | -2.851834000 | 12.168379000 |
| C  | 3.588611000 | -2.747057000 | 13.520643000 |
| C  | 3.266065000 | -1.512391000 | 14.063079000 |
| C  | 4.791692000 | 3.187916000  | 16.854986000 |
| C  | 5.019441000 | 4.559461000  | 16.695723000 |
| C  | 4.493497000 | 5.485714000  | 17.593721000 |
| C  | 3.735217000 | 5.040603000  | 18.686589000 |
| C  | 3.510116000 | 3.665375000  | 18.859121000 |
| C  | 4.025383000 | 2.754151000  | 17.949737000 |
| H  | 3.652559000 | 0.417554000  | 11.291610000 |
| H  | 4.253881000 | -1.749833000 | 10.320711000 |

|   |             |              |              |
|---|-------------|--------------|--------------|
| O | 4.254113000 | -4.108908000 | 11.739050000 |
| H | 3.573512000 | -3.646459000 | 14.129581000 |
| H | 2.997996000 | -1.442139000 | 15.112884000 |
| H | 5.613139000 | 4.911949000  | 15.857373000 |
| H | 4.687066000 | 6.540297000  | 17.436060000 |
| O | 3.178004000 | 5.848019000  | 19.631813000 |
| H | 3.832488000 | 1.694378000  | 18.085902000 |
| O | 4.438371000 | 2.186646000  | 14.137166000 |
| C | 3.348384000 | 7.257941000  | 19.522185000 |
| C | 4.639047000 | -4.299799000 | 10.380987000 |
| H | 2.914360000 | 7.646032000  | 18.592407000 |
| H | 4.406262000 | 7.542839000  | 19.579954000 |
| H | 2.814745000 | 7.684125000  | 20.373463000 |
| H | 4.832574000 | -5.369022000 | 10.279314000 |
| H | 5.552147000 | -3.742473000 | 10.137866000 |
| H | 3.837860000 | -4.010497000 | 9.689606000  |
| H | 2.919583000 | 3.334467000  | 19.708677000 |

**(ClPhSe)<sub>2</sub>**

**2**

E = -5.39405 Ha

|    |              |              |              |
|----|--------------|--------------|--------------|
| Se | -2.635894000 | -0.699619000 | 0.632703000  |
| Se | -1.613946000 | -2.850681000 | -0.112858000 |
| O  | -2.696191000 | -4.071570000 | 0.114951000  |
| C  | -1.809597000 | -2.383819000 | -2.023342000 |
| C  | -2.817932000 | -3.004595000 | -2.753688000 |
| C  | -0.900743000 | -1.524131000 | -2.639710000 |
| C  | -2.933826000 | -2.752410000 | -4.119217000 |
| C  | -1.010165000 | -1.270422000 | -4.005285000 |
| C  | -2.029384000 | -1.885883000 | -4.735189000 |
| H  | -3.501986000 | -3.686478000 | -2.255887000 |
| H  | -0.107663000 | -1.042575000 | -2.072984000 |
| H  | -3.717250000 | -3.226402000 | -4.701834000 |
| H  | -0.312177000 | -0.602540000 | -4.499415000 |
| C  | -2.292419000 | -0.901145000 | 2.515004000  |
| C  | -3.128820000 | -1.698614000 | 3.306952000  |
| C  | -1.232073000 | -0.210905000 | 3.116191000  |
| C  | -2.907121000 | -1.810448000 | 4.677231000  |
| C  | -1.010640000 | -0.308803000 | 4.487821000  |
| C  | -1.849853000 | -1.111608000 | 5.261154000  |
| H  | -3.954414000 | -2.238159000 | 2.854152000  |
| H  | -0.576284000 | 0.410583000  | 2.514049000  |
| H  | -3.553161000 | -2.432756000 | 5.287965000  |
| H  | -0.191669000 | 0.230856000  | 4.952274000  |
| Cl | -2.168289000 | -1.571403000 | -6.442053000 |
| Cl | -1.574717000 | -1.241292000 | 6.976124000  |

**TSiso**

E = -5.32751 Ha  
 nimag = -288.36 Ha

|    |              |              |              |
|----|--------------|--------------|--------------|
| Se | -1.859131000 | -0.770023000 | 0.922752000  |
| Se | -0.562831000 | -0.350904000 | -1.334951000 |
| O  | -0.694642000 | 0.569162000  | 0.566010000  |
| C  | -3.539016000 | 0.157555000  | 0.953487000  |
| C  | -4.684465000 | -0.547414000 | 1.346548000  |
| C  | -3.627094000 | 1.511393000  | 0.619178000  |
| C  | -5.916084000 | 0.096889000  | 1.396631000  |
| C  | -4.856376000 | 2.161677000  | 0.683234000  |
| C  | -5.995853000 | 1.451903000  | 1.065713000  |
| H  | -4.628110000 | -1.598729000 | 1.620269000  |

|    |              |              |              |
|----|--------------|--------------|--------------|
| H  | -2.735688000 | 2.050979000  | 0.316073000  |
| H  | -6.806982000 | -0.444553000 | 1.697794000  |
| H  | -4.931195000 | 3.214812000  | 0.431424000  |
| C  | -1.301639000 | -1.953203000 | -2.176466000 |
| C  | -2.510528000 | -1.897646000 | -2.886501000 |
| C  | -0.577801000 | -3.154579000 | -2.158227000 |
| C  | -2.978857000 | -3.008137000 | -3.582002000 |
| C  | -1.035590000 | -4.273134000 | -2.849477000 |
| C  | -2.237432000 | -4.192508000 | -3.556268000 |
| H  | -3.086069000 | -0.976431000 | -2.903954000 |
| H  | 0.356976000  | -3.214035000 | -1.607458000 |
| H  | -3.907518000 | -2.959921000 | -4.141925000 |
| H  | -0.468600000 | -5.198701000 | -2.843050000 |
| Cl | -7.535563000 | 2.263257000  | 1.133523000  |
| Cl | -2.821836000 | -5.587630000 | -4.416517000 |

**3**

E = -5.37980 Ha

|    |              |              |              |
|----|--------------|--------------|--------------|
| Se | -1.176921000 | -0.898749000 | -1.196941000 |
| Se | 1.314815000  | 1.105108000  | -1.571662000 |
| C  | -0.150949000 | -2.500526000 | -0.934494000 |
| C  | 0.001417000  | -3.005293000 | 0.362491000  |
| C  | 0.672166000  | -4.207713000 | 0.580088000  |
| C  | 1.225503000  | -4.886745000 | -0.504417000 |
| C  | 1.101323000  | -4.384025000 | -1.802244000 |
| C  | 0.398801000  | -3.202664000 | -2.015055000 |
| C  | 0.350007000  | 2.712231000  | -1.156180000 |
| C  | 0.265663000  | 3.147235000  | 0.172467000  |
| C  | -0.387956000 | 4.337001000  | 0.488714000  |
| C  | -0.984226000 | 5.079109000  | -0.530273000 |
| C  | -0.921994000 | 4.652693000  | -1.859481000 |
| C  | -0.243670000 | 3.478560000  | -2.168704000 |
| H  | -0.398285000 | -2.458866000 | 1.212070000  |
| H  | 0.782875000  | -4.601588000 | 1.585217000  |
| H  | 1.534889000  | -4.923597000 | -2.638193000 |
| H  | 0.282211000  | -2.825415000 | -3.026438000 |
| H  | 0.708180000  | 2.554451000  | 0.967477000  |
| H  | -0.447952000 | 4.676112000  | 1.517845000  |
| H  | -1.387100000 | 5.243072000  | -2.642355000 |
| H  | -0.177790000 | 3.156176000  | -3.203420000 |
| O  | -0.050221000 | 0.067175000  | -2.300350000 |
| Cl | -1.818737000 | 6.557813000  | -0.143337000 |
| Cl | 2.085671000  | -6.378377000 | -0.238878000 |

**(NH<sub>2</sub>PhSe)<sub>2</sub>**

**2**

E = -6.37798 Ha

|    |              |              |              |
|----|--------------|--------------|--------------|
| Se | -2.802661000 | -0.846111000 | 0.680397000  |
| Se | -1.547876000 | -2.843232000 | -0.178198000 |
| O  | -2.484784000 | -4.191968000 | -0.005434000 |
| C  | -1.756722000 | -2.351121000 | -2.065754000 |
| C  | -2.649417000 | -3.072076000 | -2.855979000 |
| C  | -0.961678000 | -1.355192000 | -2.636410000 |
| C  | -2.757657000 | -2.791016000 | -4.211860000 |
| C  | -1.067370000 | -1.074491000 | -3.992637000 |
| C  | -1.970255000 | -1.786631000 | -4.805304000 |
| H  | -3.250796000 | -3.855294000 | -2.402540000 |
| H  | -0.259809000 | -0.786060000 | -2.031389000 |

|   |              |              |              |
|---|--------------|--------------|--------------|
| H | -3.454834000 | -3.360053000 | -4.823482000 |
| H | -0.442636000 | -0.299174000 | -4.430867000 |
| C | -2.314428000 | -0.996454000 | 2.526748000  |
| C | -3.039386000 | -1.826027000 | 3.395138000  |
| C | -1.245748000 | -0.253997000 | 3.049885000  |
| C | -2.706132000 | -1.912337000 | 4.740020000  |
| C | -0.912927000 | -0.333140000 | 4.395900000  |
| C | -1.636092000 | -1.166997000 | 5.268100000  |
| H | -3.867484000 | -2.414158000 | 3.011938000  |
| H | -0.669435000 | 0.394959000  | 2.396955000  |
| H | -3.284011000 | -2.562789000 | 5.393283000  |
| H | -0.084435000 | 0.259176000  | 4.778923000  |
| N | -2.034226000 | -1.547739000 | -6.171097000 |
| H | -1.714083000 | -0.641963000 | -6.479909000 |
| H | -2.883212000 | -1.838280000 | -6.632872000 |
| N | -1.341575000 | -1.206364000 | 6.624416000  |
| H | -0.406703000 | -0.927875000 | 6.883229000  |
| H | -1.652791000 | -2.027953000 | 7.121164000  |

**TSiso**

E = -6.31239 Ha

nimag = -295.73 cm<sup>-1</sup>

|    |              |              |              |
|----|--------------|--------------|--------------|
| Se | -1.854532000 | -0.741352000 | 0.959511000  |
| Se | -0.561361000 | -0.374718000 | -1.348135000 |
| O  | -0.692387000 | 0.586654000  | 0.574288000  |
| C  | -3.544828000 | 0.172629000  | 0.981848000  |
| C  | -4.678196000 | -0.547531000 | 1.386066000  |
| C  | -3.626993000 | 1.515843000  | 0.627563000  |
| C  | -5.902887000 | 0.114396000  | 1.419470000  |
| C  | -4.863369000 | 2.179703000  | 0.675575000  |
| C  | -6.005027000 | 1.459455000  | 1.072093000  |
| H  | -4.610430000 | -1.593014000 | 1.674980000  |
| H  | -2.726810000 | 2.037875000  | 0.315948000  |
| H  | -6.795494000 | -0.424254000 | 1.729536000  |
| H  | -6.972552000 | 1.955129000  | 1.103915000  |
| C  | -1.289254000 | -1.950067000 | -2.188215000 |
| C  | -2.502364000 | -1.899531000 | -2.900762000 |
| C  | -0.586528000 | -3.169182000 | -2.163431000 |
| C  | -2.973129000 | -3.002357000 | -3.593108000 |
| C  | -1.049112000 | -4.278557000 | -2.852465000 |
| C  | -2.254269000 | -4.216539000 | -3.582449000 |
| H  | -3.074752000 | -0.976149000 | -2.914787000 |
| H  | 0.342160000  | -3.237844000 | -1.603150000 |
| H  | -3.902183000 | -2.933241000 | -4.155607000 |
| H  | -0.477300000 | -5.204337000 | -2.836522000 |
| N  | -2.695032000 | -5.301573000 | -4.309489000 |
| H  | -3.663792000 | -5.315335000 | -4.587713000 |
| H  | -2.319474000 | -6.206629000 | -4.073037000 |
| N  | -4.965457000 | 3.509546000  | 0.271414000  |
| H  | -4.106698000 | 4.039202000  | 0.315689000  |
| H  | -5.745055000 | 4.020723000  | 0.659456000  |

**3**

E = -6.36416 Ha

|    |             |             |             |
|----|-------------|-------------|-------------|
| Se | 5.049011000 | 1.380386000 | 4.781993000 |
| Se | 8.230350000 | 1.866230000 | 5.154553000 |
| C  | 4.575713000 | 3.195497000 | 4.415442000 |
| C  | 4.852477000 | 3.766673000 | 3.163966000 |
| C  | 4.479056000 | 5.072740000 | 2.876268000 |
| C  | 3.824685000 | 5.860728000 | 3.840854000 |
| C  | 3.554034000 | 5.289342000 | 5.099752000 |

|   |              |              |             |
|---|--------------|--------------|-------------|
| C | 3.918665000  | 3.980315000  | 5.376422000 |
| C | 8.764755000  | 0.079902000  | 4.733354000 |
| C | 8.791559000  | -0.360438000 | 3.401452000 |
| C | 9.204490000  | -1.647340000 | 3.082444000 |
| C | 9.590817000  | -2.547466000 | 4.092111000 |
| C | 9.557981000  | -2.106642000 | 5.429707000 |
| C | 9.158381000  | -0.815617000 | 5.740394000 |
| H | 5.364341000  | 3.179271000  | 2.407558000 |
| H | 4.704651000  | 5.494570000  | 1.898900000 |
| H | 3.050534000  | 5.880714000  | 5.861946000 |
| H | 3.692120000  | 3.556888000  | 6.350668000 |
| H | 8.483299000  | 0.313067000  | 2.607353000 |
| H | 9.224152000  | -1.964154000 | 2.041611000 |
| H | 9.860141000  | -2.783327000 | 6.226531000 |
| H | 9.146049000  | -0.495145000 | 6.778121000 |
| O | 6.537820000  | 1.589301000  | 5.884277000 |
| N | 3.505128000  | 7.183785000  | 3.579838000 |
| H | 2.788400000  | 7.595577000  | 4.158220000 |
| H | 3.426583000  | 7.444239000  | 2.608356000 |
| N | 10.050190000 | -3.816819000 | 3.775784000 |
| H | 9.769995000  | -4.182940000 | 2.878238000 |
| H | 10.004914000 | -4.505313000 | 4.512004000 |

### (CNPhSe)<sub>2</sub>

**2**

E = -6.42503 Ha

|    |              |              |              |
|----|--------------|--------------|--------------|
| Se | -2.728418000 | -0.842160000 | 0.646169000  |
| Se | -1.483160000 | -2.846036000 | -0.158373000 |
| O  | -2.424266000 | -4.182976000 | 0.024437000  |
| C  | -1.734679000 | -2.338305000 | -2.057638000 |
| C  | -2.664099000 | -3.052837000 | -2.807346000 |
| C  | -0.925779000 | -1.361233000 | -2.638654000 |
| C  | -2.803966000 | -2.774269000 | -4.162909000 |
| C  | -1.060384000 | -1.083270000 | -3.994253000 |
| C  | -2.003393000 | -1.787576000 | -4.763333000 |
| H  | -3.263273000 | -3.823305000 | -2.330125000 |
| H  | -0.195591000 | -0.811977000 | -2.050046000 |
| H  | -3.527462000 | -3.318481000 | -4.762175000 |
| H  | -0.440492000 | -0.325382000 | -4.462993000 |
| C  | -2.272339000 | -1.016435000 | 2.509292000  |
| C  | -2.860671000 | -2.014866000 | 3.297928000  |
| C  | -1.385077000 | -0.101761000 | 3.092923000  |
| C  | -2.557728000 | -2.104377000 | 4.651299000  |
| C  | -1.092277000 | -0.177116000 | 4.449459000  |
| C  | -1.674242000 | -1.183048000 | 5.238991000  |
| H  | -3.553986000 | -2.721784000 | 2.854307000  |
| H  | -0.924218000 | 0.671644000  | 2.486489000  |
| H  | -3.008858000 | -2.881532000 | 5.260490000  |
| H  | -0.409245000 | 0.535328000  | 4.901714000  |
| C  | -1.369641000 | -1.266897000 | 6.632582000  |
| N  | -1.119921000 | -1.333924000 | 7.767356000  |
| C  | -2.142022000 | -1.502246000 | -6.157280000 |
| N  | -2.253845000 | -1.268434000 | -7.291674000 |

**TSiso**

E = -6.35919 Ha

nimag = -288.40 cm<sup>-1</sup>

|    |              |              |              |
|----|--------------|--------------|--------------|
| Se | -1.771527000 | -0.728612000 | 0.949654000  |
| Se | -0.518696000 | -0.340848000 | -1.312881000 |
| O  | -0.657848000 | 0.638964000  | 0.549888000  |

|   |              |              |              |
|---|--------------|--------------|--------------|
| C | -3.489597000 | 0.122918000  | 0.921200000  |
| C | -4.613960000 | -0.640610000 | 1.267772000  |
| C | -3.619937000 | 1.477548000  | 0.598961000  |
| C | -5.869190000 | -0.050426000 | 1.283517000  |
| C | -4.875190000 | 2.070126000  | 0.628409000  |
| C | -6.011679000 | 1.313083000  | 0.965364000  |
| H | -4.517747000 | -1.691976000 | 1.528666000  |
| H | -2.740984000 | 2.055203000  | 0.332513000  |
| H | -6.744423000 | -0.636153000 | 1.546856000  |
| H | -4.984883000 | 3.122786000  | 0.385781000  |
| C | -1.340695000 | -1.921471000 | -2.139671000 |
| C | -2.446431000 | -1.762352000 | -2.987854000 |
| C | -0.774114000 | -3.194192000 | -1.974360000 |
| C | -2.967213000 | -2.850817000 | -3.678653000 |
| C | -1.291729000 | -4.289189000 | -2.654098000 |
| C | -2.394589000 | -4.123647000 | -3.512234000 |
| H | -2.894799000 | -0.781239000 | -3.114653000 |
| H | 0.083592000  | -3.324679000 | -1.320565000 |
| H | -3.815683000 | -2.725533000 | -4.344669000 |
| H | -0.846952000 | -5.272630000 | -2.534750000 |
| C | -7.302432000 | 1.922146000  | 0.984899000  |
| N | -8.356159000 | 2.417170000  | 0.999350000  |
| C | -2.931335000 | -5.247835000 | -4.211743000 |
| N | -3.369235000 | -6.164568000 | -4.779735000 |

**3**

E = -6.36898 Ha

|    |              |              |              |
|----|--------------|--------------|--------------|
| Te | -2.620606000 | -0.237818000 | 0.977994000  |
| Te | -1.546836000 | -3.294569000 | -0.446176000 |
| O  | -2.971484000 | -2.101132000 | 0.315762000  |
| C  | -1.774408000 | -2.731249000 | -2.480345000 |
| C  | -3.002874000 | -2.281495000 | -2.981734000 |
| C  | -0.676861000 | -2.851670000 | -3.344490000 |
| C  | -3.129373000 | -1.944781000 | -4.323409000 |
| C  | -0.806578000 | -2.542998000 | -4.693111000 |
| C  | -2.034341000 | -2.079201000 | -5.195036000 |
| H  | -3.865038000 | -2.192811000 | -2.328366000 |
| H  | 0.292154000  | -3.173971000 | -2.971961000 |
| H  | -4.080957000 | -1.589830000 | -4.707814000 |
| H  | 0.045409000  | -2.640143000 | -5.359143000 |
| C  | -2.240231000 | -0.731798000 | 3.007318000  |
| C  | -2.811472000 | -1.862761000 | 3.605059000  |
| C  | -1.430821000 | 0.120378000  | 3.771892000  |
| C  | -2.568062000 | -2.144371000 | 4.943324000  |
| C  | -1.207733000 | -0.142253000 | 5.117993000  |
| C  | -1.769795000 | -1.282783000 | 5.716157000  |
| H  | -3.448855000 | -2.526888000 | 3.029950000  |
| H  | -0.956517000 | 0.989157000  | 3.322500000  |
| H  | -3.007069000 | -3.025192000 | 5.402354000  |
| H  | -0.582601000 | 0.522087000  | 5.706887000  |
| C  | -1.529826000 | -1.565576000 | 7.094886000  |
| N  | -1.334234000 | -1.796016000 | 8.219227000  |
| C  | -2.167369000 | -1.743404000 | -6.576364000 |
| N  | -2.275664000 | -1.468865000 | -7.702589000 |

### (NO<sub>2</sub>PhSe)<sub>2</sub>

**2**

E = -6.61220 Ha

|    |              |              |              |
|----|--------------|--------------|--------------|
| Se | -2.679920000 | -0.837024000 | 0.668988000  |
| Se | -1.492684000 | -2.852606000 | -0.189863000 |

|   |              |              |              |
|---|--------------|--------------|--------------|
| O | -2.453867000 | -4.174537000 | -0.008100000 |
| C | -1.779428000 | -2.303198000 | -2.073720000 |
| C | -2.749217000 | -2.975856000 | -2.811186000 |
| C | -0.954534000 | -1.340681000 | -2.657180000 |
| C | -2.914821000 | -2.667933000 | -4.159251000 |
| C | -1.114094000 | -1.032834000 | -4.005074000 |
| C | -2.095192000 | -1.700430000 | -4.735933000 |
| H | -3.360081000 | -3.736712000 | -2.333743000 |
| H | -0.192835000 | -0.825395000 | -2.078034000 |
| H | -3.663921000 | -3.168445000 | -4.761522000 |
| H | -0.492355000 | -0.289723000 | -4.490036000 |
| C | -2.199984000 | -1.047029000 | 2.522681000  |
| C | -2.749173000 | -2.082041000 | 3.292798000  |
| C | -1.337558000 | -0.115862000 | 3.118311000  |
| C | -2.430000000 | -2.192516000 | 4.642252000  |
| C | -1.029517000 | -0.211209000 | 4.471498000  |
| C | -1.577033000 | -1.252669000 | 5.216863000  |
| H | -3.425682000 | -2.799716000 | 2.840962000  |
| H | -0.906486000 | 0.684626000  | 2.525441000  |
| H | -2.841744000 | -2.989366000 | 5.250314000  |
| H | -0.368236000 | 0.502975000  | 4.947766000  |
| N | -2.267177000 | -1.371938000 | -6.180313000 |
| N | -1.243148000 | -1.362433000 | 6.663003000  |
| O | -1.746435000 | -2.290671000 | 7.292298000  |
| O | -0.484772000 | -0.517552000 | 7.135289000  |
| O | -3.134857000 | -1.982202000 | -6.799592000 |
| O | -1.529675000 | -0.511786000 | -6.656157000 |

**TSiso**

E = -6.54659 Ha  
nimag = -288.12 cm<sup>-1</sup>

|    |              |              |              |
|----|--------------|--------------|--------------|
| Se | -1.678251000 | -0.654576000 | 1.002205000  |
| Se | -0.492747000 | -0.360502000 | -1.294305000 |
| O  | -0.623801000 | 0.726322000  | 0.499193000  |
| C  | -3.431188000 | 0.117704000  | 0.927177000  |
| C  | -4.518635000 | -0.676492000 | 1.320827000  |
| C  | -3.620906000 | 1.445345000  | 0.529852000  |
| C  | -5.800091000 | -0.142725000 | 1.309488000  |
| C  | -4.902485000 | 1.982249000  | 0.530454000  |
| C  | -5.979370000 | 1.183993000  | 0.915671000  |
| H  | -4.374859000 | -1.706225000 | 1.639273000  |
| H  | -2.769995000 | 2.046622000  | 0.227814000  |
| H  | -6.656770000 | -0.736284000 | 1.605680000  |
| H  | -5.076525000 | 3.009458000  | 0.232046000  |
| C  | -1.397833000 | -1.909819000 | -2.091852000 |
| C  | -2.184351000 | -1.673421000 | -3.228635000 |
| C  | -1.183019000 | -3.227078000 | -1.659825000 |
| C  | -2.719884000 | -2.738720000 | -3.950115000 |
| C  | -1.730621000 | -4.294189000 | -2.358856000 |
| C  | -2.491402000 | -4.036019000 | -3.501701000 |
| H  | -2.377341000 | -0.655480000 | -3.554919000 |
| H  | -0.569596000 | -3.421605000 | -0.784790000 |
| H  | -3.321324000 | -2.572103000 | -4.836219000 |
| H  | -1.563314000 | -5.318393000 | -2.046407000 |
| N  | -7.346800000 | 1.757051000  | 0.908087000  |
| O  | -8.271047000 | 1.026846000  | 1.265195000  |
| O  | -7.471204000 | 2.926177000  | 0.545041000  |
| N  | -3.074124000 | -5.178012000 | -4.256444000 |
| O  | -2.864177000 | -6.309529000 | -3.822656000 |
| O  | -3.727818000 | -4.917642000 | -5.264592000 |

**3**

E = -6.60140 Ha

|    |              |              |              |
|----|--------------|--------------|--------------|
| Se | -1.104600000 | -0.962753000 | -0.983878000 |
| Se | 1.261414000  | 1.151983000  | -1.234479000 |
| C  | -0.093324000 | -2.585908000 | -0.897301000 |
| C  | -0.391459000 | -3.470580000 | 0.150074000  |
| C  | 0.254094000  | -4.698008000 | 0.229866000  |
| C  | 1.217210000  | -5.023112000 | -0.724255000 |
| C  | 1.533862000  | -4.145842000 | -1.760977000 |
| C  | 0.868609000  | -2.929762000 | -1.855207000 |
| C  | 0.274098000  | 2.780609000  | -1.041114000 |
| C  | 0.757337000  | 3.714021000  | -0.111650000 |
| C  | 0.130536000  | 4.945624000  | 0.028570000  |
| C  | -0.996060000 | 5.227261000  | -0.743051000 |
| C  | -1.495410000 | 4.301873000  | -1.658909000 |
| C  | -0.851960000 | 3.080697000  | -1.817643000 |
| H  | -1.118041000 | -3.203623000 | 0.913153000  |
| H  | 0.034668000  | -5.392969000 | 1.031752000  |
| H  | 2.283892000  | -4.427436000 | -2.490818000 |
| H  | 1.095249000  | -2.254848000 | -2.673327000 |
| H  | 1.615715000  | 3.482519000  | 0.513764000  |
| H  | 0.491947000  | 5.678029000  | 0.740688000  |
| H  | -2.370619000 | 4.549958000  | -2.247974000 |
| H  | -1.223393000 | 2.367975000  | -2.545783000 |
| O  | -0.002145000 | 0.075172000  | -2.038404000 |
| N  | -1.676407000 | 6.532914000  | -0.584146000 |
| O  | -1.202064000 | 7.326923000  | 0.228343000  |
| O  | -2.673159000 | 6.743636000  | -1.275081000 |
| N  | 1.919412000  | -6.323876000 | -0.632318000 |
| O  | 2.766551000  | -6.575652000 | -1.489173000 |
| O  | 1.611576000  | -7.072795000 | 0.294970000  |

**(HTe)<sub>2</sub>**

**2**

E = -0.60962 Ha

|    |             |              |              |
|----|-------------|--------------|--------------|
| O  | 5.591413000 | -2.289255000 | 1.313054000  |
| Te | 5.526979000 | -0.962475000 | 0.066656000  |
| Te | 4.574212000 | 1.433482000  | 1.270455000  |
| H  | 3.931075000 | -1.107873000 | -0.547559000 |
| H  | 6.156411000 | 1.903695000  | 1.509420000  |

**TSiso**

E = -0.56259 Ha  
nimag = -230.50 cm<sup>-1</sup>

|    |              |              |              |
|----|--------------|--------------|--------------|
| Te | -1.579452000 | -0.761374000 | 1.189860000  |
| Te | -0.570200000 | -0.209035000 | -1.406907000 |
| H  | -1.328097000 | -1.643493000 | -1.973984000 |
| H  | -3.110740000 | -0.074152000 | 0.987319000  |
| O  | -0.475241000 | 0.775207000  | 0.626989000  |

**3**

E = -0.60156 Ha

|    |              |              |              |
|----|--------------|--------------|--------------|
| Te | 0.018343000  | 1.771070000  | -0.178856000 |
| Te | -0.018345000 | -1.771070000 | -0.178859000 |
| O  | 0.000011000  | 0.000003000  | -1.124280000 |
| H  | -1.642047000 | 1.856432000  | 0.044650000  |
| H  | 1.642042000  | -1.856445000 | 0.044670000  |

## (CH<sub>3</sub>Te)<sub>2</sub>

2

E = -1.79496 Ha

|    |             |              |              |
|----|-------------|--------------|--------------|
| O  | 7.107630000 | -1.056654000 | 1.540805000  |
| Te | 5.644572000 | -0.973779000 | 0.451751000  |
| Te | 4.299133000 | 1.478853000  | 0.958029000  |
| C  | 4.173177000 | -2.090349000 | 1.609512000  |
| H  | 3.181019000 | -1.968968000 | 1.171932000  |
| H  | 4.490657000 | -3.133917000 | 1.570014000  |
| H  | 4.212278000 | -1.719880000 | 2.633904000  |
| C  | 5.681488000 | 2.643825000  | -0.248769000 |
| H  | 6.682532000 | 2.569351000  | 0.173464000  |
| H  | 5.656500000 | 2.303171000  | -1.283164000 |
| H  | 5.328441000 | 3.674700000  | -0.190196000 |

TSiso

E = -1.74916 Ha

nimag = -182.89 cm<sup>-1</sup>

|    |              |              |              |
|----|--------------|--------------|--------------|
| Te | -1.614482000 | -0.736312000 | 1.201140000  |
| Te | -0.541140000 | -0.230693000 | -1.419506000 |
| O  | -0.514304000 | 0.778432000  | 0.568803000  |
| C  | -3.550949000 | 0.222440000  | 1.153192000  |
| H  | -3.727587000 | 0.610274000  | 0.151265000  |
| H  | -4.302555000 | -0.524294000 | 1.422128000  |
| H  | -3.538560000 | 1.026986000  | 1.890788000  |
| C  | -1.345235000 | -2.126938000 | -2.244970000 |
| H  | -1.021336000 | -2.097405000 | -3.293400000 |
| H  | -0.902120000 | -2.989648000 | -1.748263000 |
| H  | -2.433600000 | -2.150401000 | -2.194643000 |

3

E = -1.78696 Ha

|    |              |              |              |
|----|--------------|--------------|--------------|
| Te | -2.146224000 | -0.493533000 | 1.255678000  |
| Te | -0.059650000 | -1.742760000 | -1.312681000 |
| H  | 2.558739000  | -1.452686000 | -0.836860000 |
| C  | 1.714980000  | -0.866708000 | -0.460721000 |
| H  | 1.804765000  | 0.167509000  | -0.793251000 |
| H  | 1.676070000  | -0.935865000 | 0.626821000  |
| C  | -3.746300000 | -1.857566000 | 0.785341000  |
| H  | -4.344661000 | -1.955813000 | 1.695877000  |
| H  | -4.356222000 | -1.438875000 | -0.015241000 |
| H  | -3.335277000 | -2.829177000 | 0.509585000  |
| O  | -1.363635000 | -0.393577000 | -0.592706000 |

## (PhTe)<sub>2</sub>

2

E = -5.46234 Ha

|    |              |              |              |
|----|--------------|--------------|--------------|
| Te | -0.420733000 | -0.654016000 | -1.124021000 |
| Te | -1.963970000 | -0.927554000 | 1.268355000  |
| H  | -4.129523000 | -5.564839000 | 0.242940000  |
| H  | -2.183345000 | -6.948851000 | 0.929723000  |
| H  | -0.105703000 | -5.854908000 | 1.741881000  |
| O  | -3.696715000 | -0.540292000 | 0.844251000  |
| H  | 0.037205000  | -3.391760000 | 1.860336000  |
| C  | -1.975517000 | -3.091393000 | 1.110271000  |
| C  | -3.149049000 | -3.695231000 | 0.662122000  |

|   |              |              |              |
|---|--------------|--------------|--------------|
| C | -3.218068000 | -5.087759000 | 0.595572000  |
| C | -2.125112000 | -5.864493000 | 0.981231000  |
| C | -0.957318000 | -5.251234000 | 1.437352000  |
| C | -0.878191000 | -3.859532000 | 1.505088000  |
| H | -3.996971000 | -3.078633000 | 0.374229000  |
| C | -0.179004000 | 1.461111000  | -0.928943000 |
| C | -1.211730000 | 2.324146000  | -1.316914000 |
| C | -1.039072000 | 3.705119000  | -1.218228000 |
| C | 0.161705000  | 4.232719000  | -0.743887000 |
| C | 1.192715000  | 3.374512000  | -0.362209000 |
| C | 1.025415000  | 1.991918000  | -0.450054000 |
| H | -2.148680000 | 1.923294000  | -1.690496000 |
| H | -1.847890000 | 4.367886000  | -1.516464000 |
| H | 0.293700000  | 5.309372000  | -0.672129000 |
| H | 2.131725000  | 3.778638000  | 0.008688000  |
| H | 1.831773000  | 1.331285000  | -0.146090000 |

TSiso

E = -5.41871 Ha

nimag = -173.13 cm<sup>-1</sup>

|    |              |              |              |
|----|--------------|--------------|--------------|
| Te | -0.682459000 | -0.322656000 | 1.559539000  |
| Te | -0.550147000 | -0.491580000 | -1.358968000 |
| O  | 0.443866000  | 0.656355000  | 0.269974000  |
| H  | -2.878725000 | 4.413951000  | 1.235236000  |
| H  | -4.568685000 | 4.021093000  | 3.016184000  |
| H  | -4.651123000 | 1.823761000  | 4.179009000  |
| H  | -3.058810000 | 0.041673000  | 3.583086000  |
| C  | -2.075694000 | 1.216959000  | 2.044240000  |
| C  | -2.025524000 | 2.447256000  | 1.385123000  |
| C  | -2.921372000 | 3.454033000  | 1.744694000  |
| C  | -3.869782000 | 3.234281000  | 2.744466000  |
| C  | -3.916983000 | 2.001366000  | 3.396761000  |
| C  | -3.017346000 | 0.992311000  | 3.055143000  |
| H  | -1.292012000 | 2.615714000  | 0.602585000  |
| C  | -2.039354000 | -2.083508000 | -1.436748000 |
| C  | -3.408870000 | -1.787716000 | -1.476941000 |
| C  | -4.346224000 | -2.809922000 | -1.626573000 |
| C  | -3.925572000 | -4.137085000 | -1.732590000 |
| C  | -2.564343000 | -4.439751000 | -1.691123000 |
| C  | -1.624779000 | -3.418496000 | -1.538988000 |
| H  | -3.745421000 | -0.757563000 | -1.396031000 |
| H  | -5.406592000 | -2.569562000 | -1.663860000 |
| H  | -4.657522000 | -4.932967000 | -1.847178000 |
| H  | -2.231653000 | -5.472087000 | -1.775418000 |
| H  | -0.566295000 | -3.663197000 | -1.504293000 |

3

E = -5.45457 Ha

|    |              |              |              |
|----|--------------|--------------|--------------|
| Te | 0.363951000  | -3.319198000 | 0.681635000  |
| Te | 1.090083000  | -0.022505000 | -0.432474000 |
| H  | 3.522269000  | 0.565641000  | 1.465990000  |
| O  | -0.199870000 | -1.492141000 | 0.045041000  |
| C  | 1.371057000  | 0.776803000  | 1.520873000  |
| C  | 0.274613000  | 1.198657000  | 2.285681000  |
| C  | 0.474474000  | 1.731836000  | 3.557719000  |
| C  | 1.767241000  | 1.877995000  | 4.064903000  |
| C  | 2.861327000  | 1.472574000  | 3.301791000  |
| C  | 2.666027000  | 0.909419000  | 2.039534000  |
| H  | -0.733158000 | 1.109849000  | 1.890733000  |
| H  | -0.382087000 | 2.048176000  | 4.148533000  |
| H  | 1.919788000  | 2.305601000  | 5.052744000  |
| H  | 3.870305000  | 1.577231000  | 3.693864000  |



|   |              |              |              |
|---|--------------|--------------|--------------|
| C | 0.591911000  | -4.248628000 | -1.220091000 |
| C | -0.492234000 | -4.341594000 | -2.104165000 |
| C | -0.334346000 | -4.967055000 | -3.339592000 |
| C | 0.894311000  | -5.529444000 | -3.691521000 |
| C | 1.971756000  | -5.450678000 | -2.810230000 |
| C | 1.827690000  | -4.800758000 | -1.583295000 |
| H | -1.457347000 | -3.926335000 | -1.829276000 |
| H | -1.177907000 | -5.028031000 | -4.023303000 |
| H | 1.010303000  | -6.027243000 | -4.651080000 |
| H | 2.932587000  | -5.881899000 | -3.081386000 |
| H | 2.679747000  | -4.718112000 | -0.914591000 |

**(CH<sub>3</sub>PhTe)<sub>2</sub>**

**2**

E = -6.63993 Ha

|    |              |              |              |
|----|--------------|--------------|--------------|
| Te | -2.874167000 | -0.680766000 | 0.718441000  |
| Te | -1.387851000 | -2.944076000 | -0.211288000 |
| O  | -2.464613000 | -4.410672000 | -0.055637000 |
| C  | -1.702861000 | -2.421097000 | -2.287554000 |
| C  | -2.623943000 | -3.172992000 | -3.012992000 |
| C  | -0.961752000 | -1.419099000 | -2.916480000 |
| C  | -2.810979000 | -2.907883000 | -4.369231000 |
| C  | -1.158071000 | -1.166702000 | -4.272926000 |
| C  | -2.087155000 | -1.902054000 | -5.022512000 |
| H  | -3.183505000 | -3.963840000 | -2.519425000 |
| H  | -0.232608000 | -0.828759000 | -2.365981000 |
| H  | -3.532521000 | -3.500188000 | -4.928211000 |
| H  | -0.575262000 | -0.384679000 | -4.755214000 |
| C  | -2.353714000 | -0.945955000 | 2.771704000  |
| C  | -3.035007000 | -1.879848000 | 3.562029000  |
| C  | -1.352535000 | -0.163527000 | 3.358122000  |
| C  | -2.712116000 | -2.025289000 | 4.909520000  |
| C  | -1.044901000 | -0.313810000 | 4.709898000  |
| C  | -1.716385000 | -1.244752000 | 5.511673000  |
| H  | -3.813282000 | -2.500229000 | 3.128472000  |
| H  | -0.807657000 | 0.564176000  | 2.764031000  |
| H  | -3.249576000 | -2.763235000 | 5.501556000  |
| H  | -0.262434000 | 0.305337000  | 5.143811000  |
| C  | -2.314942000 | -1.601232000 | -6.481621000 |
| H  | -1.391893000 | -1.283990000 | -6.975885000 |
| H  | -2.706807000 | -2.471496000 | -7.015079000 |
| H  | -3.043146000 | -0.788729000 | -6.601829000 |
| C  | -1.400393000 | -1.385931000 | 6.978390000  |
| H  | -2.101074000 | -0.798677000 | 7.585944000  |
| H  | -1.481399000 | -2.426205000 | 7.307775000  |
| H  | -0.391987000 | -1.031806000 | 7.209196000  |

**TSiso**

E = -6.59477 Ha

nimag = -172.54 cm<sup>-1</sup>

|    |              |              |              |
|----|--------------|--------------|--------------|
| Te | -1.859646000 | -0.819042000 | 1.104886000  |
| Te | -0.479723000 | -0.293301000 | -1.431762000 |
| O  | -0.643055000 | 0.643523000  | 0.583282000  |
| C  | -3.709423000 | 0.235000000  | 1.075904000  |
| C  | -4.864673000 | -0.389538000 | 1.557727000  |
| C  | -3.776288000 | 1.549087000  | 0.609705000  |
| C  | -6.075894000 | 0.298626000  | 1.561946000  |
| C  | -4.992654000 | 2.228135000  | 0.634230000  |
| C  | -6.164246000 | 1.620691000  | 1.105711000  |
| H  | -4.836783000 | -1.410764000 | 1.932904000  |

|   |              |              |              |
|---|--------------|--------------|--------------|
| H | -2.884096000 | 2.039203000  | 0.232004000  |
| H | -6.966480000 | -0.204113000 | 1.933294000  |
| H | -5.028583000 | 3.253061000  | 0.270319000  |
| C | -1.275914000 | -2.089599000 | -2.365053000 |
| C | -2.507680000 | -2.073075000 | -3.033288000 |
| C | -0.521472000 | -3.269874000 | -2.383069000 |
| C | -2.961092000 | -3.202322000 | -3.711514000 |
| C | -0.981063000 | -4.396042000 | -3.064864000 |
| C | -2.207582000 | -4.384738000 | -3.741850000 |
| H | -3.118047000 | -1.173781000 | -3.027065000 |
| H | 0.433062000  | -3.313388000 | -1.864704000 |
| H | -3.918940000 | -3.162843000 | -4.227230000 |
| C | -7.468842000 | 2.373803000  | 1.149770000  |
| H | -8.325746000 | 1.701649000  | 1.047480000  |
| H | -7.582389000 | 2.903151000  | 2.104882000  |
| H | -7.526553000 | 3.123552000  | 0.355381000  |
| H | -0.374286000 | -5.299695000 | -3.067155000 |
| C | -2.689969000 | -5.593410000 | -4.501391000 |
| H | -2.391394000 | -5.534059000 | -5.556270000 |
| H | -2.269667000 | -6.518208000 | -4.096313000 |
| H | -3.780879000 | -5.673910000 | -4.479009000 |

**3**

E = -6.63096 Ha

|    |             |              |              |
|----|-------------|--------------|--------------|
| Te | 3.541736000 | 1.724838000  | 12.324902000 |
| Te | 5.557498000 | 3.484749000  | 14.672175000 |
| C  | 3.011242000 | 0.157393000  | 13.660265000 |
| C  | 1.924440000 | 0.303814000  | 14.530306000 |
| C  | 1.561068000 | -0.735806000 | 15.387303000 |
| C  | 2.277933000 | -1.936855000 | 15.417282000 |
| C  | 3.370722000 | -2.069773000 | 14.546806000 |
| C  | 3.728801000 | -1.047747000 | 13.673689000 |
| C  | 5.699054000 | 5.288348000  | 13.555471000 |
| C  | 6.771246000 | 5.508658000  | 12.678446000 |
| C  | 6.863173000 | 6.699810000  | 11.966298000 |
| C  | 5.909791000 | 7.718271000  | 12.120355000 |
| C  | 4.851065000 | 7.493296000  | 13.006489000 |
| C  | 4.735833000 | 6.292285000  | 13.707797000 |
| H  | 1.359639000 | 1.231516000  | 14.546003000 |
| H  | 0.709357000 | -0.601087000 | 16.050700000 |
| C  | 1.904555000 | -3.051767000 | 16.359774000 |
| H  | 3.945277000 | -2.994100000 | 14.542902000 |
| H  | 4.569493000 | -1.188286000 | 13.000519000 |
| H  | 7.536342000 | 4.748248000  | 12.551526000 |
| H  | 7.700908000 | 6.846374000  | 11.287110000 |
| C  | 6.026338000 | 9.004777000  | 11.344532000 |
| H  | 4.093895000 | 8.261949000  | 13.146142000 |
| H  | 3.888994000 | 6.139948000  | 14.370912000 |
| H  | 1.831486000 | -4.009796000 | 15.833607000 |
| H  | 0.947483000 | -2.861038000 | 16.851650000 |
| H  | 2.663503000 | -3.173592000 | 17.142510000 |
| H  | 5.278162000 | 9.735899000  | 11.660663000 |
| H  | 5.890001000 | 8.829524000  | 10.270379000 |
| H  | 7.016545000 | 9.456433000  | 11.471325000 |
| O  | 5.325173000 | 2.202233000  | 13.135802000 |

**(CH<sub>3</sub>OPhTe)<sub>2</sub>**

**2**

E = -7.07734 Ha

|    |             |             |              |
|----|-------------|-------------|--------------|
| Te | 2.668867000 | 0.776774000 | 14.623685000 |
|----|-------------|-------------|--------------|

|    |             |              |              |
|----|-------------|--------------|--------------|
| Te | 5.327609000 | 1.685600000  | 15.213893000 |
| C  | 3.384284000 | -0.944686000 | 13.539900000 |
| C  | 3.338430000 | -0.900452000 | 12.150096000 |
| C  | 3.740028000 | -2.002416000 | 11.393523000 |
| C  | 4.187759000 | -3.162873000 | 12.038740000 |
| C  | 4.224575000 | -3.206237000 | 13.442926000 |
| C  | 3.824218000 | -2.105491000 | 14.186858000 |
| C  | 4.715461000 | 3.367370000  | 16.365849000 |
| C  | 4.375576000 | 4.567987000  | 15.735762000 |
| C  | 4.005519000 | 5.691217000  | 16.476767000 |
| C  | 3.976469000 | 5.624970000  | 17.875238000 |
| C  | 4.318817000 | 4.422647000  | 18.514238000 |
| C  | 4.681194000 | 3.310165000  | 17.768307000 |
| H  | 2.982398000 | -0.001469000 | 11.652582000 |
| H  | 3.696268000 | -1.940718000 | 10.312346000 |
| O  | 4.603270000 | -4.298172000 | 11.409565000 |
| H  | 4.570129000 | -4.113615000 | 13.929916000 |
| H  | 3.863038000 | -2.163795000 | 15.272329000 |
| H  | 4.390509000 | 4.638974000  | 14.652636000 |
| H  | 3.745025000 | 6.601612000  | 15.949765000 |
| O  | 3.636149000 | 6.653888000  | 18.702504000 |
| H  | 4.940872000 | 2.390678000  | 18.284309000 |
| O  | 2.041798000 | 1.813856000  | 13.256267000 |
| C  | 3.274091000 | 7.905568000  | 18.127456000 |
| C  | 4.600252000 | -4.335632000 | 9.985504000  |
| H  | 4.099589000 | 8.337938000  | 17.548231000 |
| H  | 3.045372000 | 8.560031000  | 18.970349000 |
| H  | 2.386657000 | 7.815489000  | 17.488704000 |
| H  | 4.969368000 | -5.327248000 | 9.718196000  |
| H  | 5.266703000 | -3.575050000 | 9.560141000  |
| H  | 3.589265000 | -4.204980000 | 9.579980000  |
| H  | 4.293476000 | 4.380195000  | 19.599479000 |

### TSiso

E = -7.03232 Ha  
 nimag = -170.02 cm<sup>-1</sup>

|    |              |              |              |
|----|--------------|--------------|--------------|
| Te | -1.919920000 | -0.834247000 | 1.082318000  |
| Te | -0.492551000 | -0.317775000 | -1.446045000 |
| O  | -0.654744000 | 0.594898000  | 0.585672000  |
| C  | -3.720399000 | 0.294370000  | 1.089859000  |
| C  | -4.874938000 | -0.243060000 | 1.678314000  |
| C  | -3.765296000 | 1.576476000  | 0.544424000  |
| C  | -6.053073000 | 0.487949000  | 1.707729000  |
| C  | -4.942567000 | 2.324539000  | 0.584648000  |
| C  | -6.097565000 | 1.781618000  | 1.162316000  |
| H  | -4.866107000 | -1.235279000 | 2.124824000  |
| H  | -2.876799000 | 2.004928000  | 0.090833000  |
| H  | -6.951563000 | 0.078193000  | 2.160219000  |
| H  | -4.942268000 | 3.321171000  | 0.158576000  |
| C  | -1.236732000 | -2.123602000 | -2.379762000 |
| C  | -2.502302000 | -2.174838000 | -2.989781000 |
| C  | -0.423607000 | -3.260259000 | -2.450615000 |
| C  | -2.928111000 | -3.311926000 | -3.658557000 |
| C  | -0.834897000 | -4.412005000 | -3.124341000 |
| C  | -2.096351000 | -4.443091000 | -3.732458000 |
| H  | -3.161439000 | -1.311926000 | -2.945371000 |
| H  | 0.555451000  | -3.255544000 | -1.978185000 |
| H  | -3.902260000 | -3.348141000 | -4.138897000 |
| H  | -0.169295000 | -5.266758000 | -3.163566000 |
| O  | -2.612865000 | -5.505489000 | -4.412810000 |
| C  | -1.833194000 | -6.691281000 | -4.530349000 |
| H  | -0.893616000 | -6.505603000 | -5.065561000 |

|   |              |              |              |
|---|--------------|--------------|--------------|
| H | -1.614374000 | -7.129936000 | -3.548783000 |
| H | -2.444010000 | -7.387823000 | -5.107298000 |
| O | -7.303439000 | 2.413500000  | 1.250843000  |
| C | -7.425873000 | 3.733169000  | 0.730566000  |
| H | -8.460185000 | 4.027179000  | 0.917506000  |
| H | -6.753299000 | 4.433473000  | 1.241595000  |
| H | -7.231968000 | 3.761955000  | -0.349058000 |

### 3

E = -7.06914 Ha

|    |             |              |              |
|----|-------------|--------------|--------------|
| Te | 2.388626000 | 0.694008000  | 14.323520000 |
| Te | 5.585562000 | 2.069862000  | 15.101292000 |
| C  | 3.146312000 | -1.086848000 | 13.458145000 |
| C  | 3.149185000 | -1.263766000 | 12.069628000 |
| C  | 3.645180000 | -2.430219000 | 11.488487000 |
| C  | 4.141294000 | -3.455901000 | 12.305058000 |
| C  | 4.136691000 | -3.292197000 | 13.699481000 |
| C  | 3.650365000 | -2.122325000 | 14.264239000 |
| C  | 4.885819000 | 3.536049000  | 16.463780000 |
| C  | 4.835517000 | 4.886452000  | 16.098682000 |
| C  | 4.385010000 | 5.861609000  | 16.987846000 |
| C  | 3.983597000 | 5.491641000  | 18.278908000 |
| C  | 4.035503000 | 4.140743000  | 18.658019000 |
| C  | 4.476143000 | 3.179380000  | 17.760388000 |
| H  | 2.761755000 | -0.481642000 | 11.423175000 |
| H  | 3.632877000 | -2.526297000 | 10.409012000 |
| O  | 4.643777000 | -4.639940000 | 11.855608000 |
| H  | 4.525300000 | -4.093424000 | 14.321796000 |
| H  | 3.664811000 | -2.011045000 | 15.344336000 |
| H  | 5.150153000 | 5.190857000  | 15.104679000 |
| H  | 4.358797000 | 6.895916000  | 16.665051000 |
| O  | 3.533615000 | 6.351795000  | 19.235010000 |
| H  | 4.500575000 | 2.138872000  | 18.070154000 |
| O  | 3.947135000 | 1.915383000  | 13.933395000 |
| C  | 3.446932000 | 7.739831000  | 18.927367000 |
| C  | 4.689839000 | -4.880352000 | 10.452458000 |
| H  | 4.430185000 | 8.162202000  | 18.685527000 |
| H  | 3.063688000 | 8.216536000  | 19.831227000 |
| H  | 2.753556000 | 7.927351000  | 18.098151000 |
| H  | 5.128019000 | -5.873526000 | 10.339900000 |
| H  | 5.321653000 | -4.146127000 | 9.937400000  |
| H  | 3.686544000 | -4.875881000 | 10.008594000 |
| H  | 3.720311000 | 3.866078000  | 19.660754000 |

### (ClPhTe)<sub>2</sub>

### 2

E = -5.34336 Ha

|    |              |              |              |
|----|--------------|--------------|--------------|
| Te | -2.856655000 | -0.660059000 | 0.717296000  |
| Te | -1.359244000 | -2.919382000 | -0.209596000 |
| O  | -2.434877000 | -4.384369000 | -0.047749000 |
| C  | -1.688793000 | -2.407524000 | -2.288664000 |
| C  | -2.609560000 | -3.174642000 | -2.999923000 |
| C  | -0.960375000 | -1.402971000 | -2.928444000 |
| C  | -2.816141000 | -2.931897000 | -4.357054000 |
| C  | -1.159959000 | -1.155301000 | -4.285515000 |
| C  | -2.089479000 | -1.922672000 | -4.990258000 |
| H  | -3.160679000 | -3.964238000 | -2.494748000 |
| H  | -0.235005000 | -0.799444000 | -2.387774000 |
| H  | -3.532926000 | -3.522241000 | -4.919110000 |
| H  | -0.600123000 | -0.375758000 | -4.792134000 |

|    |              |              |              |
|----|--------------|--------------|--------------|
| C  | -2.340788000 | -0.944677000 | 2.769176000  |
| C  | -3.002795000 | -1.908710000 | 3.539839000  |
| C  | -1.364905000 | -0.141581000 | 3.372190000  |
| C  | -2.690769000 | -2.075139000 | 4.887986000  |
| C  | -1.053025000 | -0.295090000 | 4.722058000  |
| C  | -1.717593000 | -1.264781000 | 5.472862000  |
| H  | -3.764745000 | -2.540586000 | 3.094437000  |
| H  | -0.839303000 | 0.612166000  | 2.793834000  |
| H  | -3.202824000 | -2.827387000 | 5.479428000  |
| H  | -0.297785000 | 0.331585000  | 5.185576000  |
| Cl | -2.339816000 | -1.618226000 | -6.684523000 |
| Cl | -1.328753000 | -1.464682000 | 7.156865000  |

### TSiso

E = -5.30010 Ha

nimag = -171.00 cm<sup>-1</sup>

|    |              |              |              |
|----|--------------|--------------|--------------|
| Te | -1.861964000 | -0.822813000 | 1.099884000  |
| Te | -0.483359000 | -0.288581000 | -1.435352000 |
| O  | -0.648339000 | 0.641131000  | 0.579929000  |
| C  | -3.709466000 | 0.235371000  | 1.054023000  |
| C  | -4.876971000 | -0.393533000 | 1.500727000  |
| C  | -3.755726000 | 1.561171000  | 0.617691000  |
| C  | -6.088323000 | 0.294029000  | 1.502248000  |
| C  | -4.961983000 | 2.258143000  | 0.630027000  |
| C  | -6.123189000 | 1.619947000  | 1.067709000  |
| H  | -4.863515000 | -1.421979000 | 1.855558000  |
| H  | -2.852060000 | 2.054323000  | 0.272586000  |
| H  | -6.995927000 | -0.192756000 | 1.844359000  |
| H  | -5.000740000 | 3.290530000  | 0.297016000  |
| C  | -1.283763000 | -2.086739000 | -2.367162000 |
| C  | -2.516285000 | -2.066723000 | -3.034109000 |
| C  | -0.531377000 | -3.269017000 | -2.379557000 |
| C  | -2.986234000 | -3.193074000 | -3.706774000 |
| C  | -0.987383000 | -4.403893000 | -3.048965000 |
| C  | -2.216581000 | -4.357854000 | -3.707546000 |
| H  | -3.121063000 | -1.163900000 | -3.037414000 |
| H  | 0.426194000  | -3.312154000 | -1.867273000 |
| H  | -3.938107000 | -3.169063000 | -4.228269000 |
| H  | -0.396382000 | -5.314480000 | -3.060367000 |
| Cl | -7.633946000 | 2.487768000  | 1.074946000  |
| Cl | -2.799600000 | -5.772863000 | -4.541303000 |

### 3

E = -5.33605 Ha

|    |              |              |             |
|----|--------------|--------------|-------------|
| Te | 4.908284000  | 1.337765000  | 4.621921000 |
| Te | 8.396660000  | 1.919391000  | 5.029483000 |
| Cl | 3.173370000  | 7.724330000  | 3.850975000 |
| Cl | 10.242299000 | -4.413071000 | 4.090055000 |
| C  | 4.380660000  | 3.384727000  | 4.385201000 |
| C  | 4.350935000  | 3.962901000  | 3.109316000 |
| C  | 3.969195000  | 5.292929000  | 2.937116000 |
| C  | 3.638119000  | 6.057643000  | 4.054897000 |
| C  | 3.674201000  | 5.504716000  | 5.336557000 |
| C  | 4.032241000  | 4.168543000  | 5.494036000 |
| C  | 8.964713000  | -0.108635000 | 4.732918000 |
| C  | 9.261105000  | -0.578057000 | 3.446545000 |
| C  | 9.666258000  | -1.896765000 | 3.243805000 |
| C  | 9.751952000  | -2.759397000 | 4.335768000 |
| C  | 9.449239000  | -2.315147000 | 5.624450000 |
| C  | 9.070025000  | -0.989633000 | 5.818276000 |
| H  | 4.632203000  | 3.379883000  | 2.237181000 |

|   |             |              |             |
|---|-------------|--------------|-------------|
| H | 3.943147000 | 5.734820000  | 1.946158000 |
| H | 3.411082000 | 6.109721000  | 6.198414000 |
| H | 4.038678000 | 3.739424000  | 6.491599000 |
| H | 9.171592000 | 0.082053000  | 2.588715000 |
| H | 9.898965000 | -2.254466000 | 2.245894000 |
| H | 9.523198000 | -2.995735000 | 6.466693000 |
| H | 8.854659000 | -0.645603000 | 6.825542000 |
| O | 6.548690000 | 1.592917000  | 5.763571000 |

### (NH<sub>2</sub>PhTe)<sub>2</sub>

### 2

E = -6.32795 Ha

|    |              |              |              |
|----|--------------|--------------|--------------|
| Te | -2.838194000 | -0.640526000 | 0.728291000  |
| Te | -1.406582000 | -2.942136000 | -0.233045000 |
| O  | -2.517576000 | -4.384574000 | -0.070870000 |
| C  | -1.705194000 | -2.423997000 | -2.299889000 |
| C  | -2.647929000 | -3.149933000 | -3.029497000 |
| C  | -0.949150000 | -1.436795000 | -2.937984000 |
| C  | -2.841805000 | -2.885946000 | -4.379662000 |
| C  | -1.140120000 | -1.170975000 | -4.288729000 |
| C  | -2.093070000 | -1.890372000 | -5.034225000 |
| H  | -3.228060000 | -3.925187000 | -2.534843000 |
| H  | -0.207285000 | -0.858285000 | -2.391760000 |
| H  | -3.578481000 | -3.460153000 | -4.938144000 |
| H  | -0.543656000 | -0.401557000 | -4.774566000 |
| C  | -2.344329000 | -0.917090000 | 2.776573000  |
| C  | -3.094615000 | -1.786292000 | 3.581421000  |
| C  | -1.286228000 | -0.211282000 | 3.366013000  |
| C  | -2.795196000 | -1.948313000 | 4.928376000  |
| C  | -0.986423000 | -0.366693000 | 4.714338000  |
| C  | -1.735170000 | -1.240533000 | 5.522595000  |
| H  | -3.918271000 | -2.349911000 | 3.154079000  |
| H  | -0.685872000 | 0.469241000  | 2.769347000  |
| H  | -3.393551000 | -2.629540000 | 5.529926000  |
| H  | -0.163607000 | 0.198136000  | 5.148042000  |
| N  | -2.245085000 | -1.666431000 | -6.395792000 |
| H  | -1.946115000 | -0.763944000 | -6.734133000 |
| H  | -3.122698000 | -1.960867000 | -6.797800000 |
| N  | -1.475175000 | -1.354925000 | 6.882178000  |
| H  | -0.544342000 | -1.100127000 | 7.177542000  |
| H  | -1.803288000 | -2.200651000 | 7.324702000  |

### TSiso

E = -6.28321 Ha

nimag = -178.05 cm<sup>-1</sup>

|    |              |              |              |
|----|--------------|--------------|--------------|
| Te | -1.854498000 | -0.806617000 | 1.144373000  |
| Te | -0.475671000 | -0.305712000 | -1.417801000 |
| O  | -0.638568000 | 0.648185000  | 0.612400000  |
| C  | -3.712448000 | 0.237117000  | 1.089090000  |
| C  | -4.865992000 | -0.406844000 | 1.552390000  |
| C  | -3.753669000 | 1.548005000  | 0.626507000  |
| C  | -6.070886000 | 0.294981000  | 1.531626000  |
| C  | -4.968075000 | 2.255436000  | 0.617747000  |
| C  | -6.130468000 | 1.607595000  | 1.073750000  |
| H  | -4.838757000 | -1.426632000 | 1.927476000  |
| H  | -2.843014000 | 2.022914000  | 0.271227000  |
| H  | -6.979451000 | -0.187464000 | 1.885081000  |
| H  | -7.081544000 | 2.135210000  | 1.064381000  |
| C  | -1.281299000 | -2.060591000 | -2.373982000 |

|   |              |              |              |
|---|--------------|--------------|--------------|
| C | -2.503011000 | -2.017036000 | -3.066051000 |
| C | -0.568830000 | -3.271101000 | -2.376537000 |
| C | -2.982033000 | -3.123366000 | -3.753899000 |
| C | -1.038110000 | -4.383946000 | -3.061701000 |
| C | -2.256722000 | -4.330724000 | -3.765040000 |
| H | -3.088807000 | -1.101581000 | -3.071178000 |
| H | 0.373316000  | -3.344484000 | -1.839227000 |
| H | -3.923734000 | -3.056623000 | -4.295779000 |
| H | -0.456745000 | -5.304227000 | -3.060935000 |
| N | -2.703158000 | -5.419397000 | -4.495344000 |
| H | -3.686943000 | -5.442829000 | -4.717262000 |
| H | -2.331192000 | -6.320900000 | -4.237358000 |
| N | -5.027224000 | 3.548470000  | 0.104198000  |
| H | -4.151582000 | 4.051376000  | 0.096932000  |
| H | -5.789352000 | 4.117061000  | 0.443710000  |

**3**

E = -6.32025 Ha

|    |              |              |             |
|----|--------------|--------------|-------------|
| Te | 4.882029000  | 1.350855000  | 4.663253000 |
| Te | 8.386012000  | 1.896412000  | 5.071608000 |
| C  | 4.370828000  | 3.387478000  | 4.404927000 |
| C  | 4.643398000  | 4.053694000  | 3.199630000 |
| C  | 4.295510000  | 5.386633000  | 3.020928000 |
| C  | 3.666683000  | 6.108922000  | 4.051369000 |
| C  | 3.396367000  | 5.443936000  | 5.262445000 |
| C  | 3.738116000  | 4.109266000  | 5.430033000 |
| C  | 8.972595000  | -0.110680000 | 4.751266000 |
| C  | 8.970341000  | -0.667404000 | 3.462538000 |
| C  | 9.365826000  | -1.981514000 | 3.247044000 |
| C  | 9.772349000  | -2.794103000 | 4.320923000 |
| C  | 9.773376000  | -2.238431000 | 5.614376000 |
| C  | 9.385427000  | -0.921946000 | 5.820635000 |
| H  | 5.135089000  | 3.524661000  | 2.388500000 |
| H  | 4.521062000  | 5.879617000  | 2.077327000 |
| H  | 2.913111000  | 5.981716000  | 6.075831000 |
| H  | 3.509955000  | 3.621371000  | 6.373263000 |
| H  | 8.651513000  | -0.067759000 | 2.614985000 |
| H  | 9.359423000  | -2.386569000 | 2.237000000 |
| H  | 10.090277000 | -2.844809000 | 6.460650000 |
| H  | 9.400131000  | -0.520065000 | 6.829618000 |
| O  | 6.531772000  | 1.576222000  | 5.805827000 |
| N  | 3.372944000  | 7.455207000  | 3.899700000 |
| H  | 2.669096000  | 7.832880000  | 4.515994000 |
| H  | 3.289320000  | 7.792334000  | 2.952488000 |
| N  | 10.218281000 | -4.089161000 | 4.104603000 |
| H  | 9.912278000  | -4.530298000 | 3.250284000 |
| H  | 10.188925000 | -4.710328000 | 4.899214000 |

**(CNPhTe)<sub>2</sub>**

**2**

E = -6.37537 Ha

|    |              |              |              |
|----|--------------|--------------|--------------|
| Te | -2.713756000 | -0.573831000 | 0.678076000  |
| Te | -1.299025000 | -2.904654000 | -0.199770000 |
| O  | -2.419010000 | -4.321487000 | 0.047305000  |
| C  | -1.698874000 | -2.435364000 | -2.284466000 |
| C  | -2.697673000 | -3.171316000 | -2.920475000 |
| C  | -0.945884000 | -1.492060000 | -2.987253000 |
| C  | -2.959472000 | -2.954377000 | -4.269593000 |
| C  | -1.202097000 | -1.272620000 | -4.336943000 |
| C  | -2.213380000 | -2.002501000 | -4.985018000 |

|   |              |              |              |
|---|--------------|--------------|--------------|
| H | -3.262292000 | -3.913101000 | -2.361007000 |
| H | -0.159836000 | -0.920369000 | -2.500005000 |
| H | -3.737614000 | -3.518629000 | -4.774814000 |
| H | -0.624509000 | -0.541129000 | -4.893746000 |
| C | -2.327605000 | -0.943309000 | 2.747051000  |
| C | -3.004676000 | -1.969718000 | 3.419355000  |
| C | -1.427087000 | -0.131830000 | 3.449831000  |
| C | -2.777939000 | -2.189275000 | 4.773732000  |
| C | -1.205973000 | -0.338982000 | 4.807146000  |
| C | -1.878563000 | -1.372856000 | 5.479197000  |
| H | -3.708547000 | -2.603302000 | 2.889734000  |
| H | -0.893291000 | 0.664691000  | 2.940990000  |
| H | -3.299341000 | -2.989277000 | 5.290398000  |
| H | -0.509873000 | 0.293193000  | 5.349959000  |
| C | -1.648817000 | -1.591817000 | 6.872620000  |
| N | -1.460608000 | -1.769523000 | 8.007290000  |
| C | -2.477818000 | -1.778082000 | -6.372045000 |
| N | -2.692096000 | -1.593693000 | -7.500845000 |

**TSiso**

E = -6.33235 Ha

nimag = -170.04 cm<sup>-1</sup>

|    |              |              |              |
|----|--------------|--------------|--------------|
| Te | -1.790155000 | -0.808260000 | 1.120512000  |
| Te | -0.471017000 | -0.260933000 | -1.422544000 |
| O  | -0.616027000 | 0.680360000  | 0.590380000  |
| C  | -3.667311000 | 0.196344000  | 1.053658000  |
| C  | -4.827841000 | -0.486168000 | 1.439812000  |
| C  | -3.733273000 | 1.537871000  | 0.666855000  |
| C  | -6.053890000 | 0.166983000  | 1.429237000  |
| C  | -4.956607000 | 2.196995000  | 0.666997000  |
| C  | -6.128029000 | 1.516927000  | 1.043577000  |
| H  | -4.791972000 | -1.527263000 | 1.752699000  |
| H  | -2.831705000 | 2.064611000  | 0.369644000  |
| H  | -6.956516000 | -0.359965000 | 1.723004000  |
| H  | -5.012919000 | 3.240477000  | 0.371827000  |
| C  | -1.309932000 | -2.056936000 | -2.347748000 |
| C  | -2.541838000 | -2.008090000 | -3.015150000 |
| C  | -0.580215000 | -3.253927000 | -2.349862000 |
| C  | -3.035667000 | -3.126756000 | -3.678023000 |
| C  | -1.062780000 | -4.379829000 | -3.009445000 |
| C  | -2.297996000 | -4.323403000 | -3.677231000 |
| H  | -3.121417000 | -1.089228000 | -3.024737000 |
| H  | 0.376495000  | -3.310640000 | -1.837862000 |
| H  | -3.987182000 | -3.082387000 | -4.199823000 |
| H  | -0.491022000 | -5.303242000 | -3.013443000 |
| C  | -7.386265000 | 2.192508000  | 1.036045000  |
| N  | -8.412285000 | 2.742354000  | 1.029117000  |
| C  | -2.802398000 | -5.478000000 | -4.351434000 |
| N  | -3.214141000 | -6.419292000 | -4.898490000 |

**3**

E = -6.36898 Ha

|    |              |              |              |
|----|--------------|--------------|--------------|
| Te | -2.620606000 | -0.237818000 | 0.977994000  |
| Te | -1.546836000 | -3.294569000 | -0.446176000 |
| O  | -2.971484000 | -2.101132000 | 0.315762000  |
| C  | -1.774408000 | -2.731249000 | -2.480345000 |
| C  | -3.002874000 | -2.281495000 | -2.981734000 |
| C  | -0.676861000 | -2.851670000 | -3.344490000 |
| C  | -3.129373000 | -1.944781000 | -4.323409000 |
| C  | -0.806578000 | -2.542998000 | -4.693111000 |
| C  | -2.034341000 | -2.079201000 | -5.195036000 |

|   |              |              |              |
|---|--------------|--------------|--------------|
| H | -3.865038000 | -2.192811000 | -2.328366000 |
| H | 0.292154000  | -3.173971000 | -2.971961000 |
| H | -4.080957000 | -1.589830000 | -4.707814000 |
| H | 0.045409000  | -2.640143000 | -5.359143000 |
| C | -2.240231000 | -0.731798000 | 3.007318000  |
| C | -2.811472000 | -1.862761000 | 3.605059000  |
| C | -1.430821000 | 0.120378000  | 3.771892000  |
| C | -2.568062000 | -2.144371000 | 4.943324000  |
| C | -1.207733000 | -0.142253000 | 5.117993000  |
| C | -1.769795000 | -1.282783000 | 5.716157000  |
| H | -3.448855000 | -2.526888000 | 3.029950000  |
| H | -0.956517000 | 0.989157000  | 3.322500000  |
| H | -3.007069000 | -3.025192000 | 5.402354000  |
| H | -0.582601000 | 0.522087000  | 5.706887000  |
| C | -1.529826000 | -1.565576000 | 7.094886000  |
| N | -1.334234000 | -1.796016000 | 8.219227000  |
| C | -2.167369000 | -1.743404000 | -6.576364000 |
| N | -2.275664000 | -1.468865000 | -7.702589000 |

**(NO<sub>2</sub>PhTe)<sub>2</sub>**

**2**

E = -6.56265 Ha

|    |              |              |              |
|----|--------------|--------------|--------------|
| Te | -2.636648000 | -0.552650000 | 0.704819000  |
| Te | -1.250833000 | -2.874960000 | -0.237406000 |
| O  | -2.364084000 | -4.292125000 | 0.033755000  |
| C  | -1.720257000 | -2.377882000 | -2.302409000 |
| C  | -2.745135000 | -3.099817000 | -2.912604000 |
| C  | -0.984389000 | -1.430065000 | -3.017757000 |
| C  | -3.052673000 | -2.863026000 | -4.250539000 |
| C  | -1.285443000 | -1.189873000 | -4.356175000 |
| C  | -2.318607000 | -1.909800000 | -4.952331000 |
| H  | -3.295741000 | -3.845512000 | -2.344762000 |
| H  | -0.177745000 | -0.870466000 | -2.550763000 |
| H  | -3.847270000 | -3.406003000 | -4.749022000 |
| H  | -0.733067000 | -0.459503000 | -4.935546000 |
| C  | -2.234439000 | -0.964286000 | 2.762605000  |
| C  | -2.840150000 | -2.056625000 | 3.398972000  |
| C  | -1.399953000 | -0.108680000 | 3.494718000  |
| C  | -2.607570000 | -2.297427000 | 4.750181000  |
| C  | -1.174430000 | -0.336207000 | 4.849311000  |
| C  | -1.779891000 | -1.431327000 | 5.460327000  |
| H  | -3.493767000 | -2.723742000 | 2.846768000  |
| H  | -0.920079000 | 0.737214000  | 3.012723000  |
| H  | -3.065554000 | -3.140730000 | 5.253695000  |
| H  | -0.533707000 | 0.318300000  | 5.428481000  |
| N  | -2.644032000 | -1.653616000 | -6.384954000 |
| N  | -1.536584000 | -1.680810000 | 6.907281000  |
| O  | -2.099553000 | -2.646311000 | 7.418866000  |
| O  | -0.787321000 | -0.905010000 | 7.497960000  |
| O  | -3.559946000 | -2.304043000 | -6.882009000 |
| O  | -1.975216000 | -0.807825000 | -6.974770000 |

**TSiso**

E = -6.51977 Ha

nimag = -170.17 cm<sup>-1</sup>

|    |              |              |              |
|----|--------------|--------------|--------------|
| Te | -1.783970000 | -0.792270000 | 1.129348000  |
| Te | -0.458895000 | -0.262830000 | -1.406563000 |
| O  | -0.608213000 | 0.694073000  | 0.601205000  |
| C  | -3.661700000 | 0.208053000  | 1.048733000  |
| C  | -4.824874000 | -0.484346000 | 1.410620000  |

|   |              |              |              |
|---|--------------|--------------|--------------|
| C | -3.725007000 | 1.555590000  | 0.681395000  |
| C | -6.053412000 | 0.166250000  | 1.396173000  |
| C | -4.950945000 | 2.212743000  | 0.676690000  |
| C | -6.102296000 | 1.510716000  | 1.030156000  |
| H | -4.790031000 | -1.530125000 | 1.707294000  |
| H | -2.821564000 | 2.088916000  | 0.402554000  |
| H | -6.965719000 | -0.351473000 | 1.667990000  |
| H | -5.023223000 | 3.257998000  | 0.399350000  |
| C | -1.302895000 | -2.062894000 | -2.326211000 |
| C | -2.526188000 | -2.009190000 | -3.009037000 |
| C | -0.580875000 | -3.264573000 | -2.310279000 |
| C | -3.020615000 | -3.130074000 | -3.671419000 |
| C | -1.063609000 | -4.393674000 | -2.967660000 |
| C | -2.281383000 | -4.310859000 | -3.639190000 |
| H | -3.099082000 | -1.086574000 | -3.033065000 |
| H | 0.369512000  | -3.324434000 | -1.787309000 |
| H | -3.961218000 | -3.098323000 | -4.209151000 |
| H | -0.511343000 | -5.326344000 | -2.966888000 |
| N | -7.411803000 | 2.210330000  | 1.019074000  |
| O | -8.405666000 | 1.560977000  | 1.342492000  |
| O | -7.420170000 | 3.394716000  | 0.687029000  |
| N | -2.805823000 | -5.515080000 | -4.341288000 |
| O | -2.134913000 | -6.543730000 | -4.281829000 |
| O | -3.876988000 | -5.404704000 | -4.934497000 |

**3**

E = -6.55762 Ha

|    |              |              |              |
|----|--------------|--------------|--------------|
| Te | -1.213897000 | -1.054134000 | -0.765884000 |
| Te | 1.438984000  | 1.271082000  | -0.947213000 |
| C  | -0.120800000 | -2.866292000 | -0.883605000 |
| C  | -0.440689000 | -3.900031000 | 0.009422000  |
| C  | 0.217715000  | -5.121477000 | -0.065856000 |
| C  | 1.214002000  | -5.298483000 | -1.025108000 |
| C  | 1.551216000  | -4.278277000 | -1.913424000 |
| C  | 0.874829000  | -3.065280000 | -1.848731000 |
| C  | 0.309335000  | 3.064369000  | -0.991295000 |
| C  | 0.693449000  | 4.121022000  | -0.152094000 |
| C  | 0.007750000  | 5.329358000  | -0.186238000 |
| C  | -1.079468000 | 5.469556000  | -1.047739000 |
| C  | -1.481033000 | 4.426100000  | -1.880591000 |
| C  | -0.777981000 | 3.226878000  | -1.859579000 |
| H  | -1.195913000 | -3.761339000 | 0.779242000  |
| H  | -0.020204000 | -5.928021000 | 0.617683000  |
| H  | 2.326375000  | -4.445246000 | -2.652342000 |
| H  | 1.123542000  | -2.279914000 | -2.554873000 |
| H  | 1.520675000  | 4.010133000  | 0.544699000  |
| H  | 0.294337000  | 6.153360000  | 0.456593000  |
| H  | -2.326624000 | 4.564803000  | -2.544276000 |
| H  | -1.077931000 | 2.423545000  | -2.524407000 |
| O  | 0.066872000  | 0.086499000  | -1.806939000 |
| N  | -1.822285000 | 6.750285000  | -1.076657000 |
| O  | -1.432908000 | 7.651690000  | -0.333755000 |
| O  | -2.782950000 | 6.834703000  | -1.842036000 |
| N  | 1.928018000  | -6.593475000 | -1.099615000 |
| O  | 2.803759000  | -6.713030000 | -1.956719000 |
| O  | 1.601539000  | -7.470952000 | -0.299852000 |
